# Supplementary material
Source: publisher figshare collection journal article supplement (https://gsapubs.figshare.com/articles/dataset/_/13123292)

A. SGP1, Postseismic-reduced GPS field

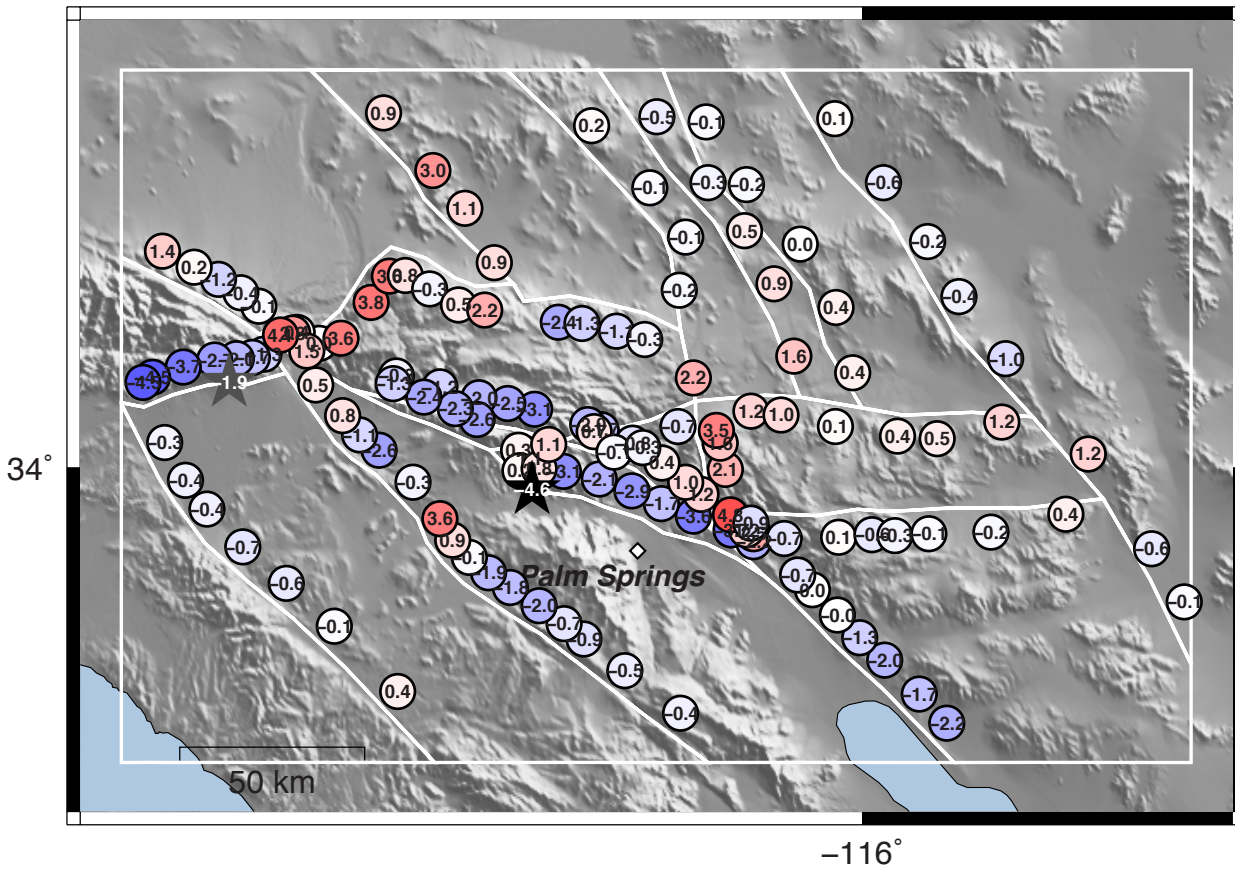

B. SGP2, Postseismic-reduced GPS field

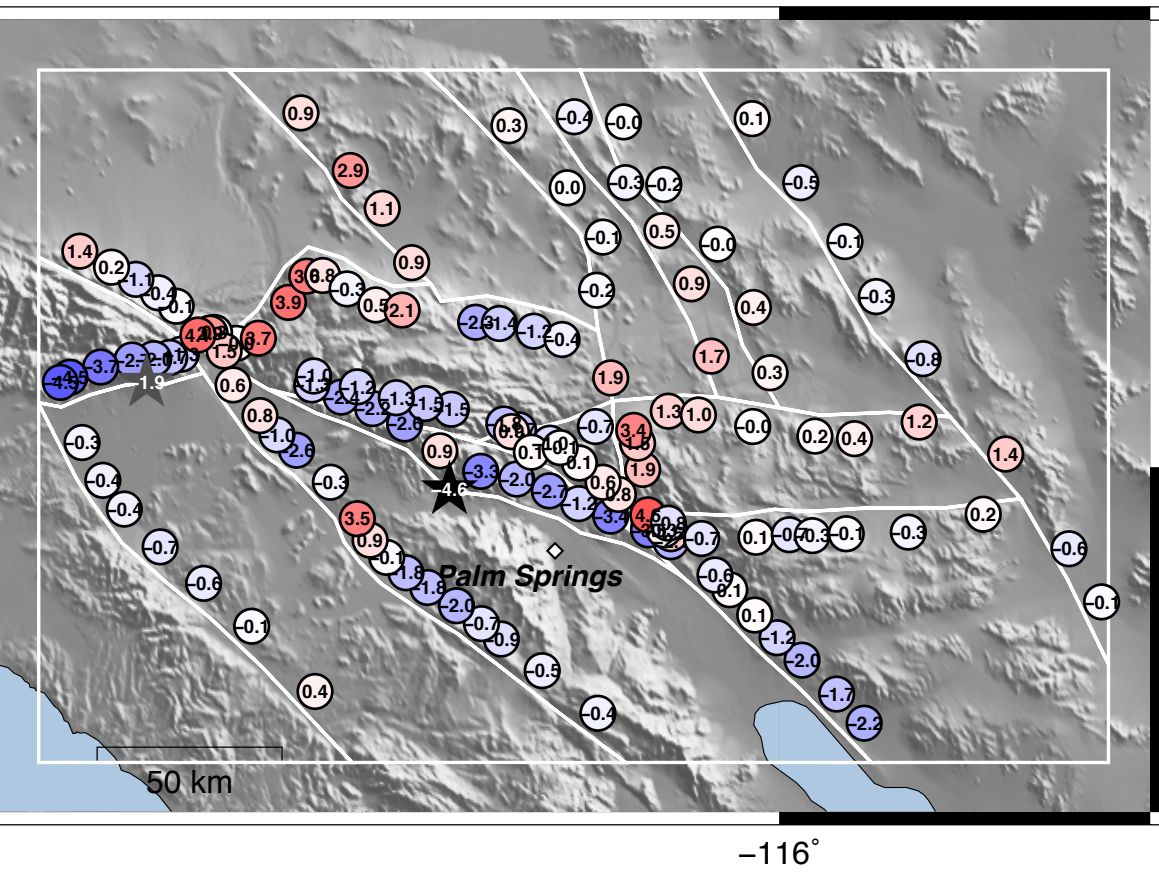

C. SGP3, Postseismic-reduced GPS field

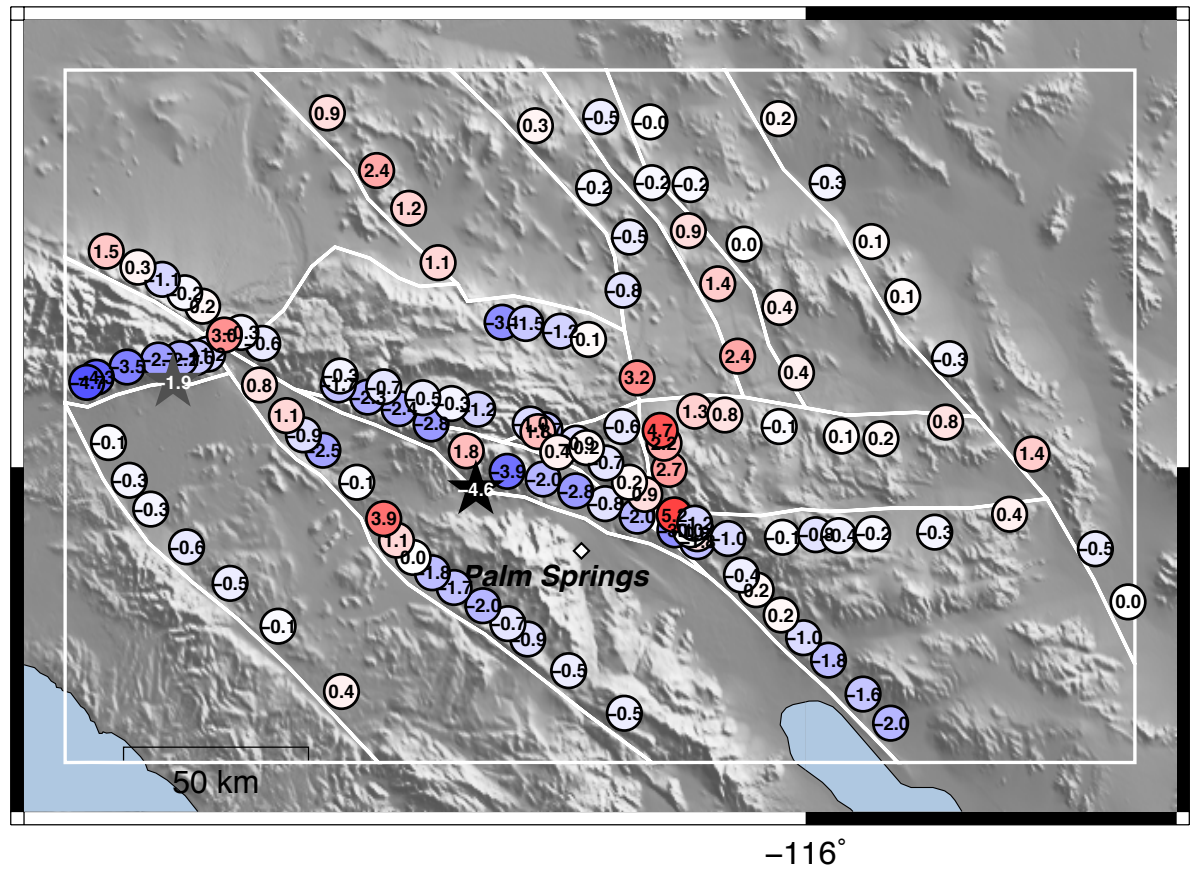

D. SGP4, Postseismic-reduced GPS field

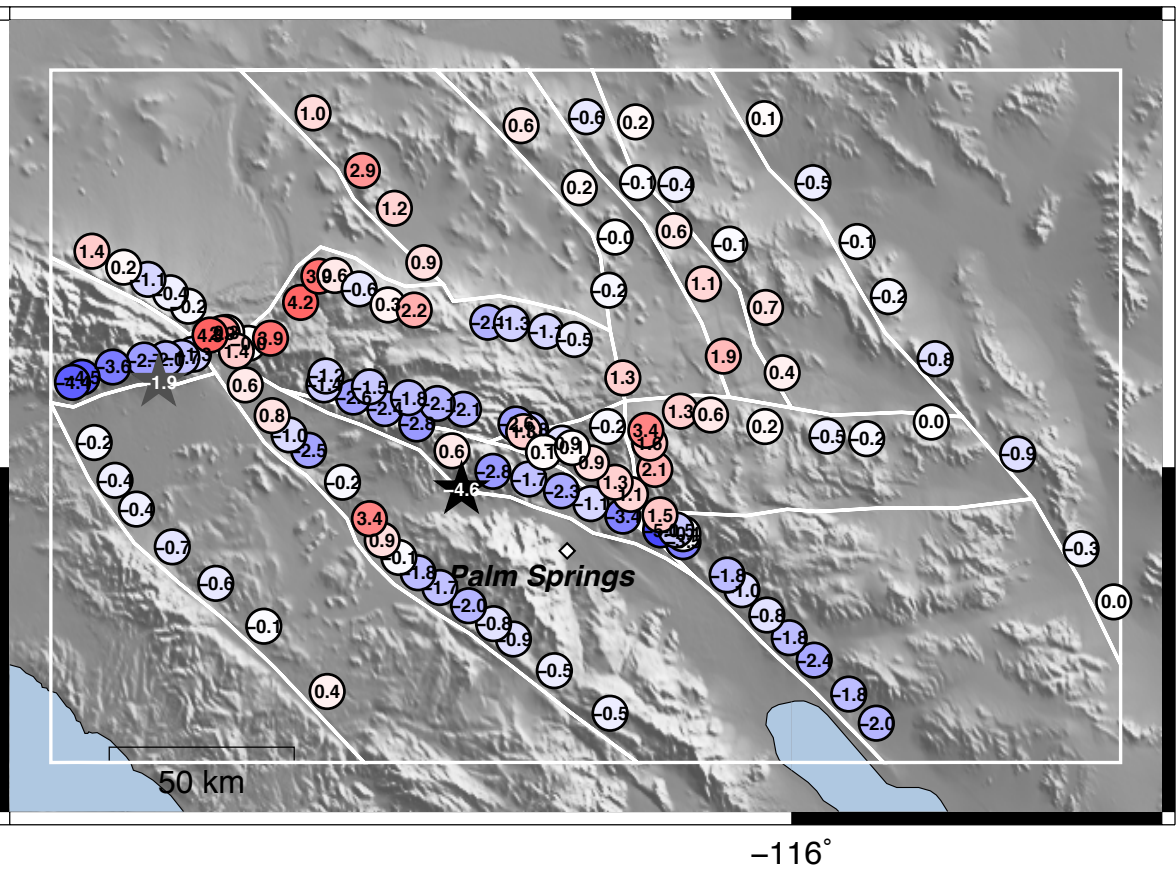

E. SGP5, Postseismic-reduced GPS field

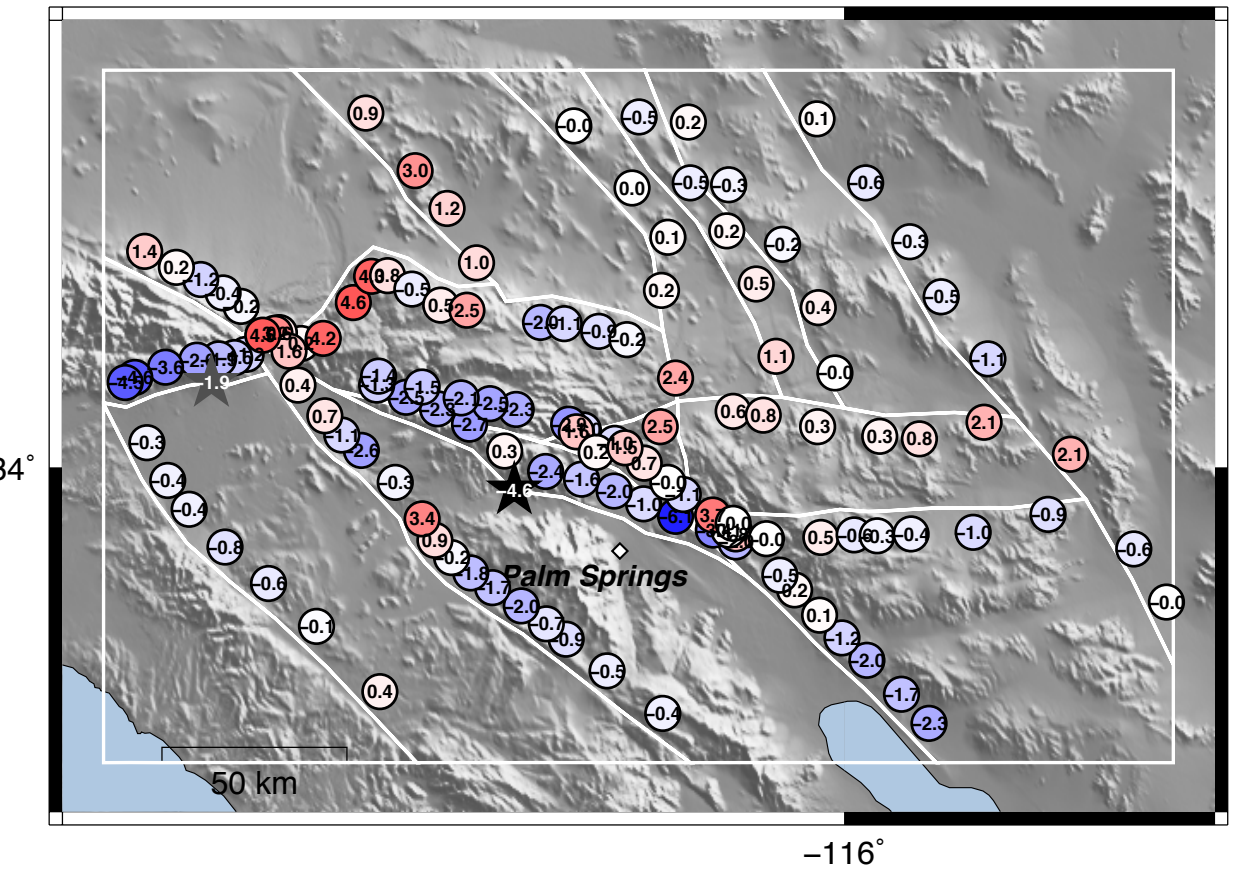

F. SGP6, Postseismic-reduced GPS field

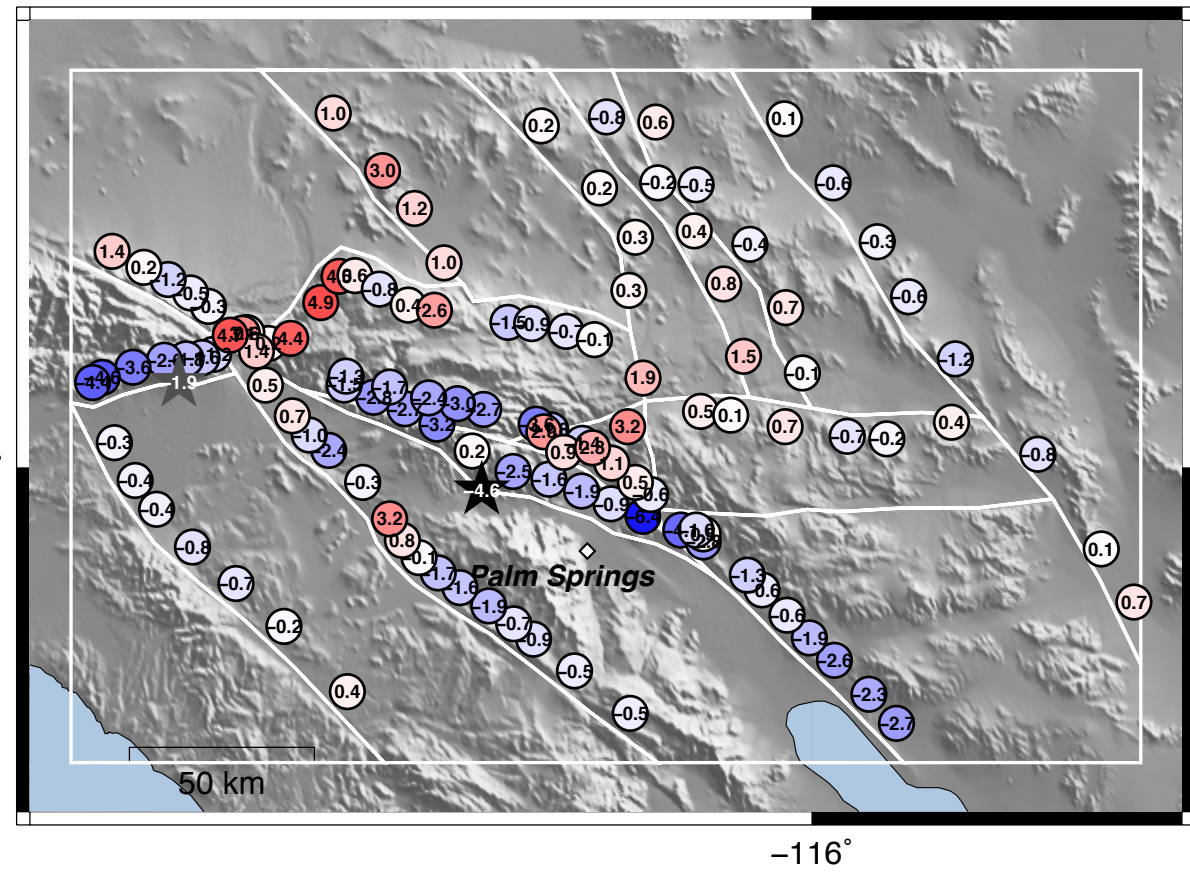

G. SGP7, Postseismic-reduced GPS field

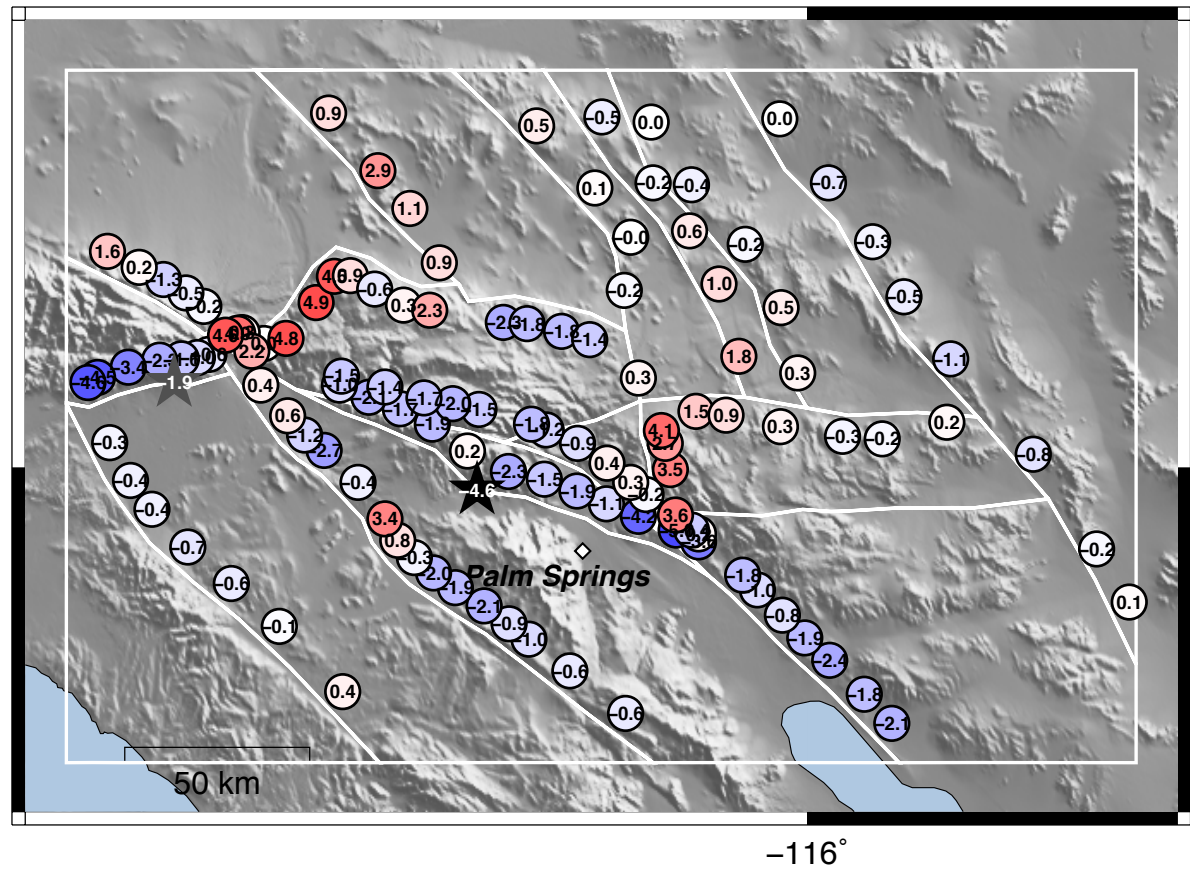

H. SGP8, Postseismic-reduced GPS field

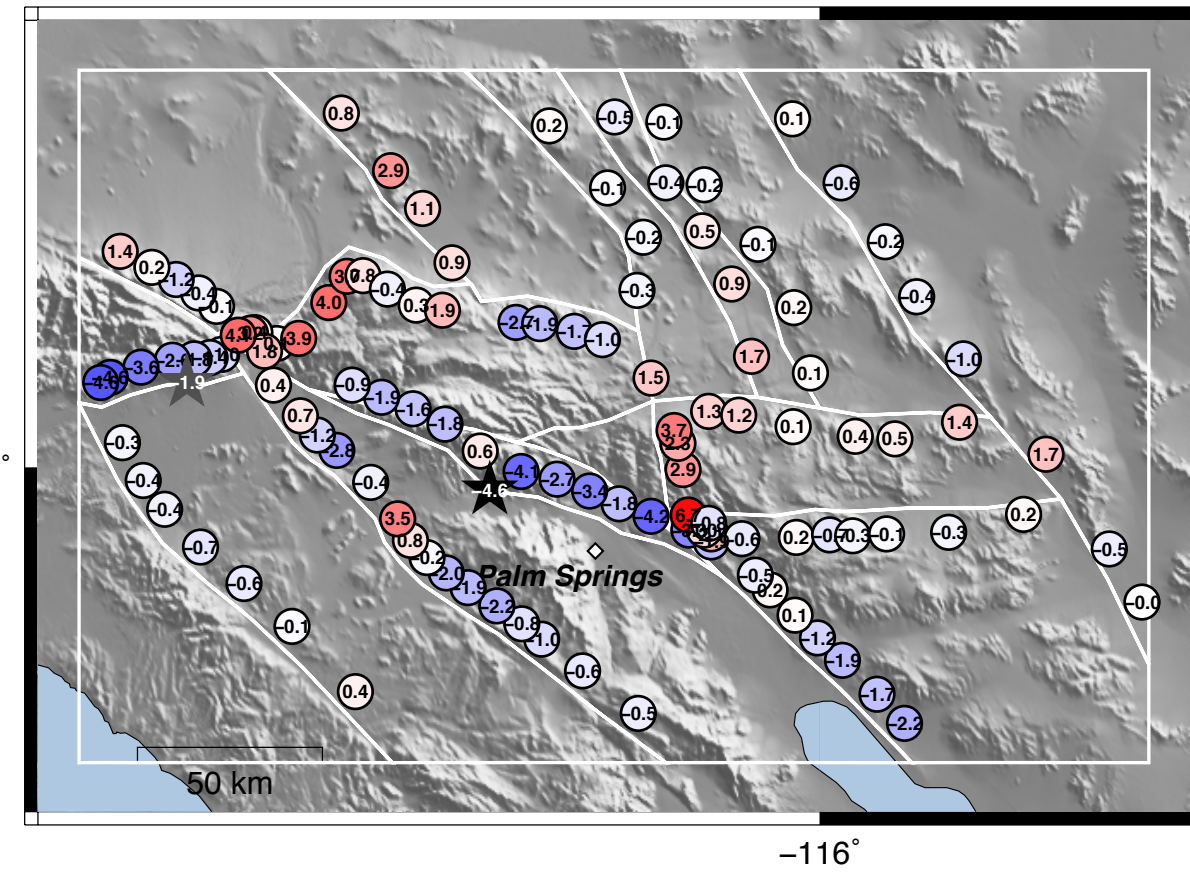

I. SGP9, Postseismic-reduced GPS field

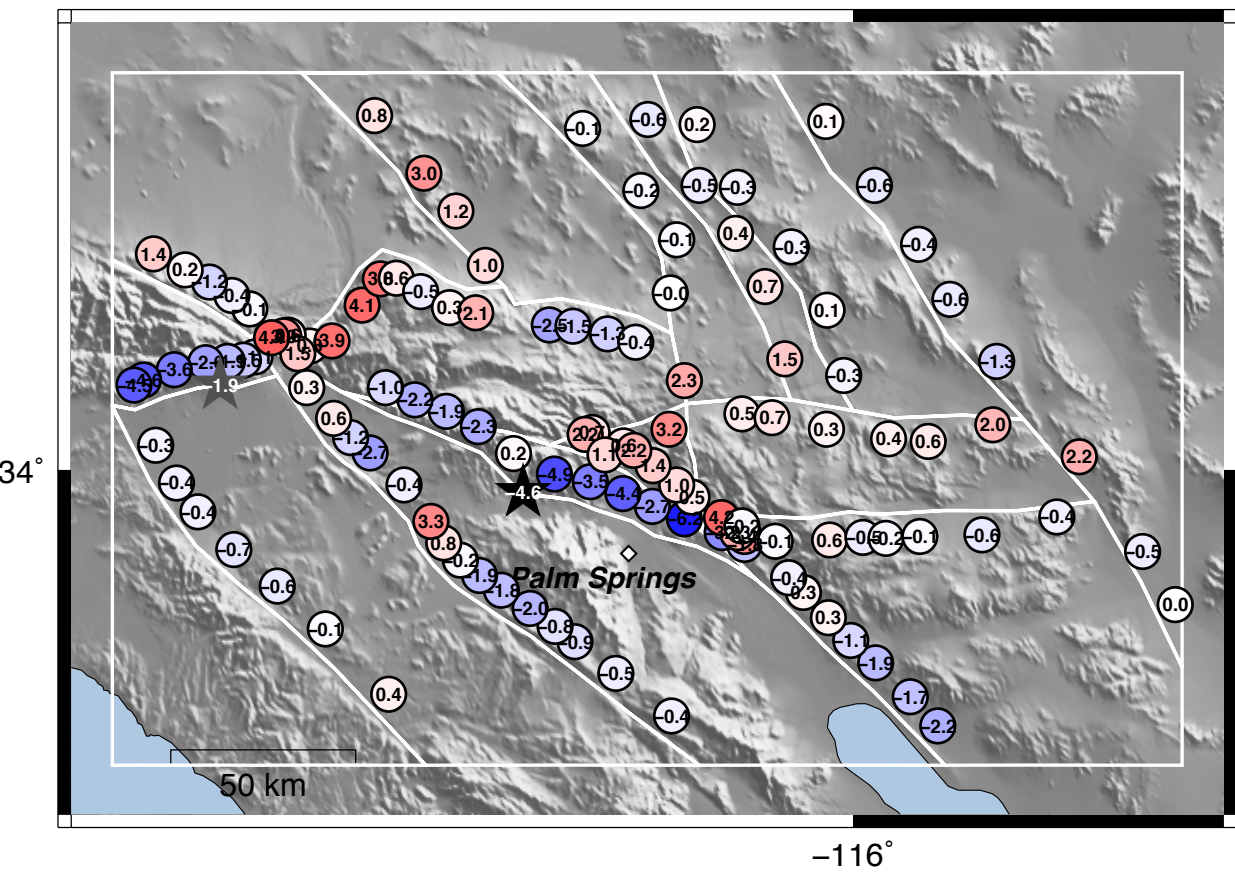

J. SGP10, Postseismic-reduced GPS field

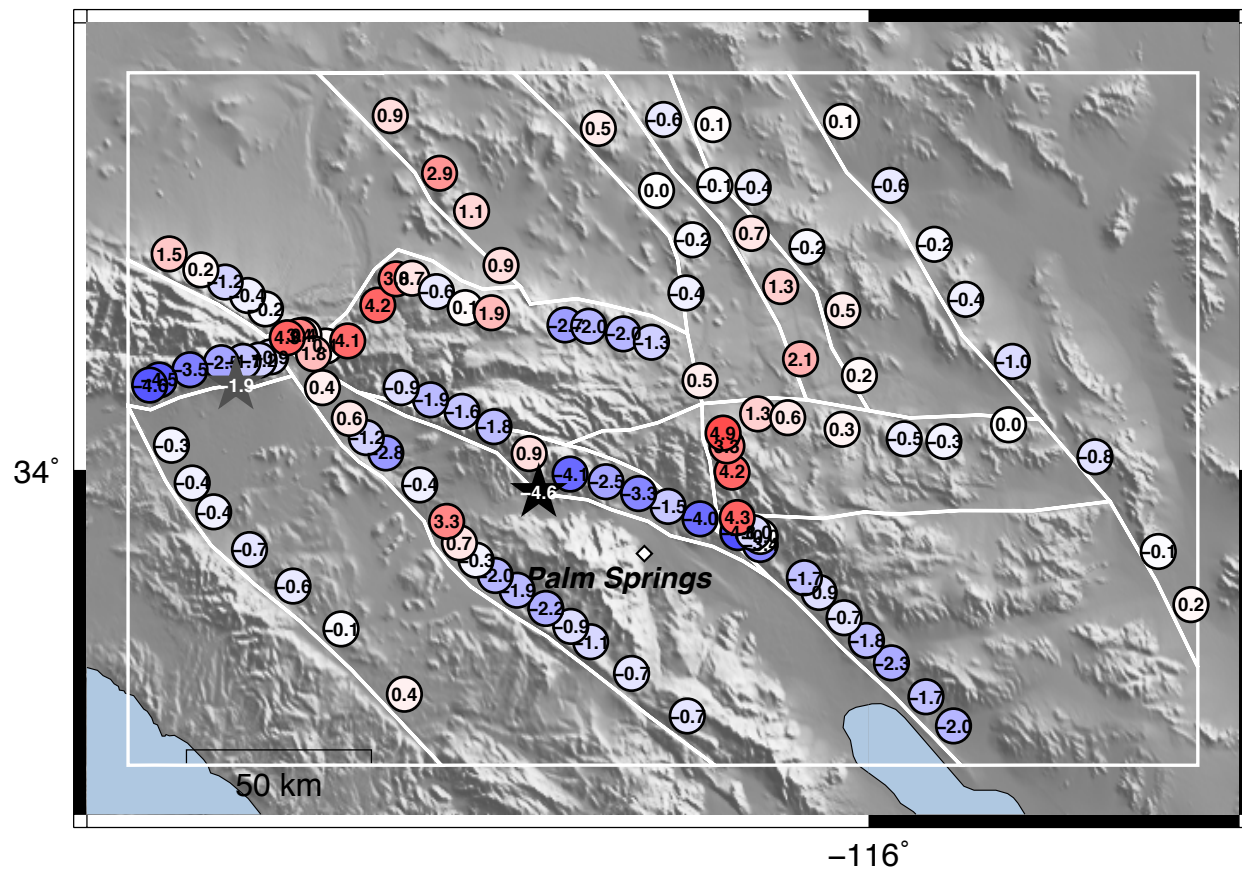

K. SGP11, Postseismic-reduced GPS field

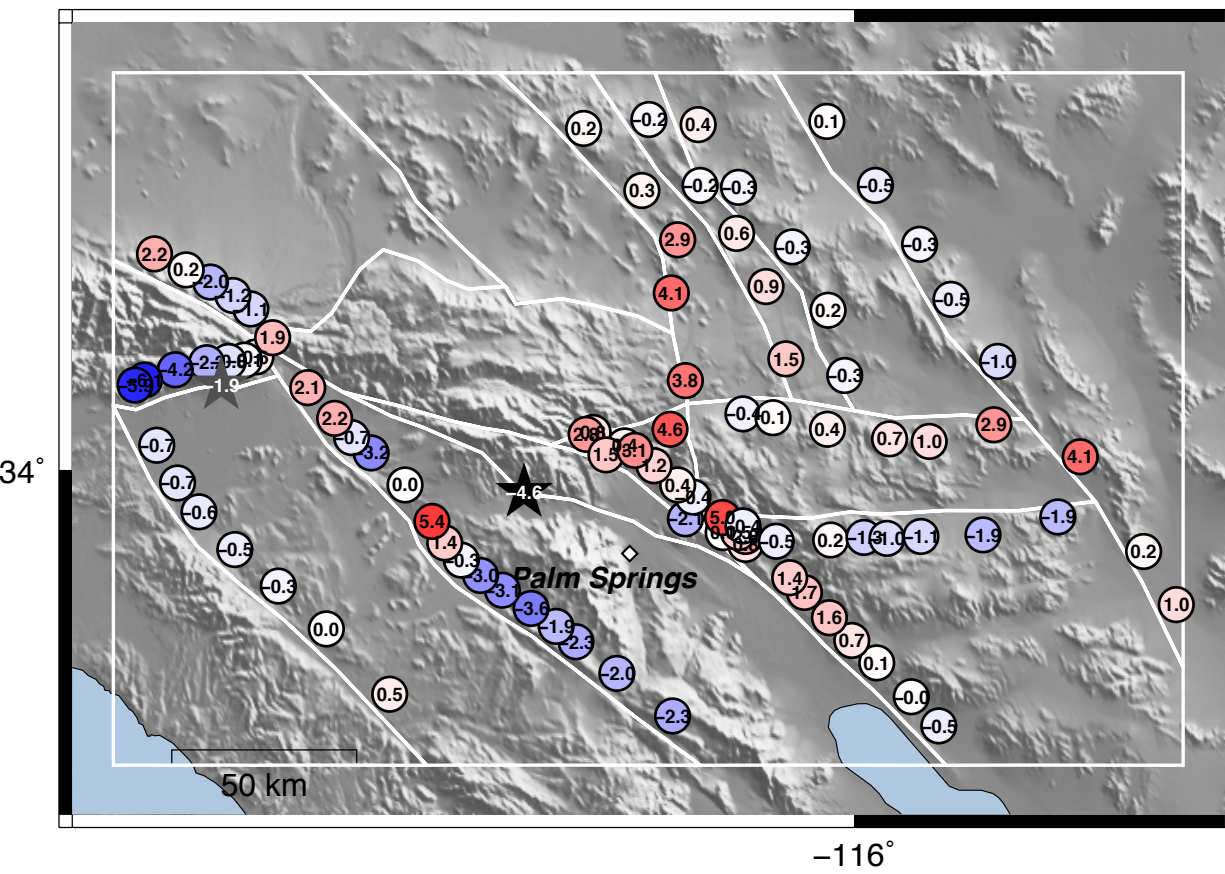

L. SGP12, Postseismic-reduced GPS field

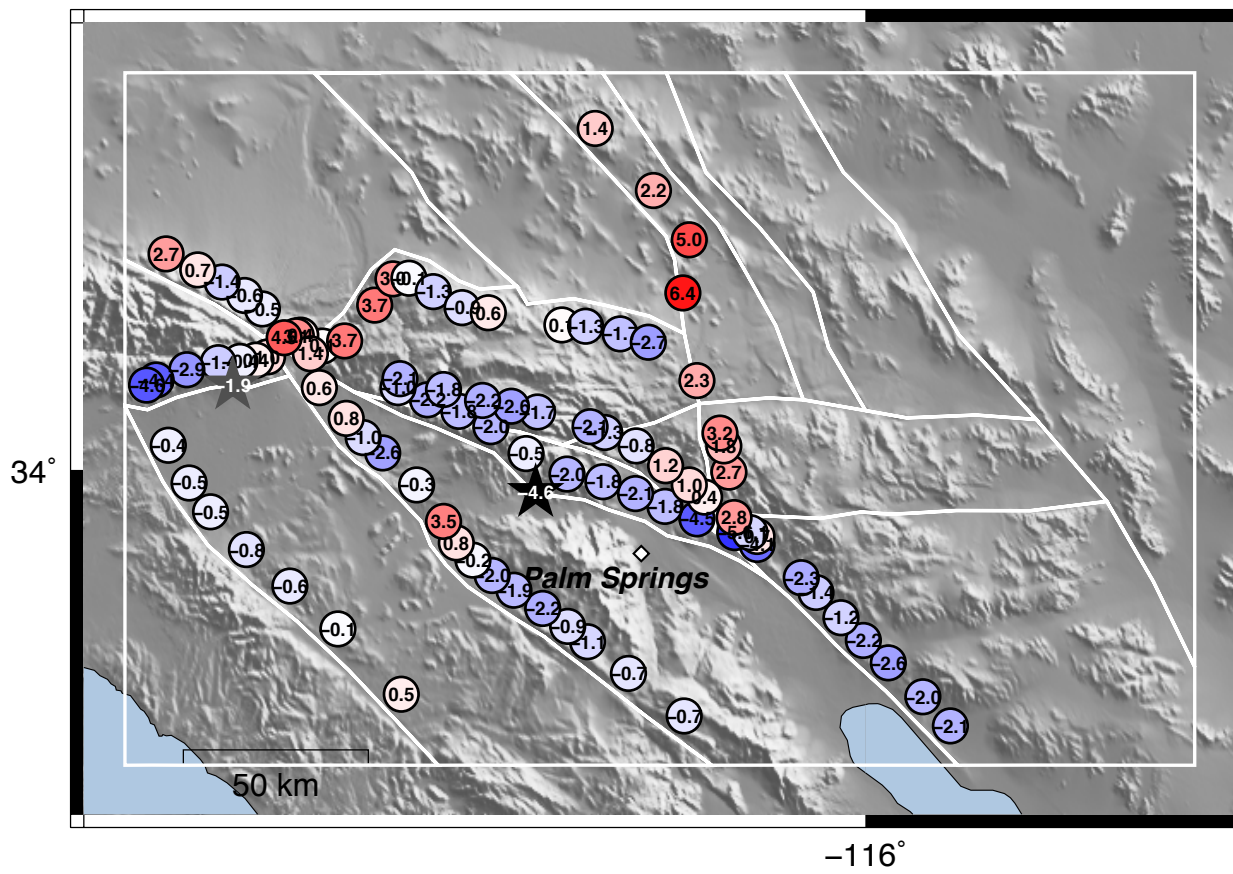

M. SGP13, Postseismic-reduced GPS field

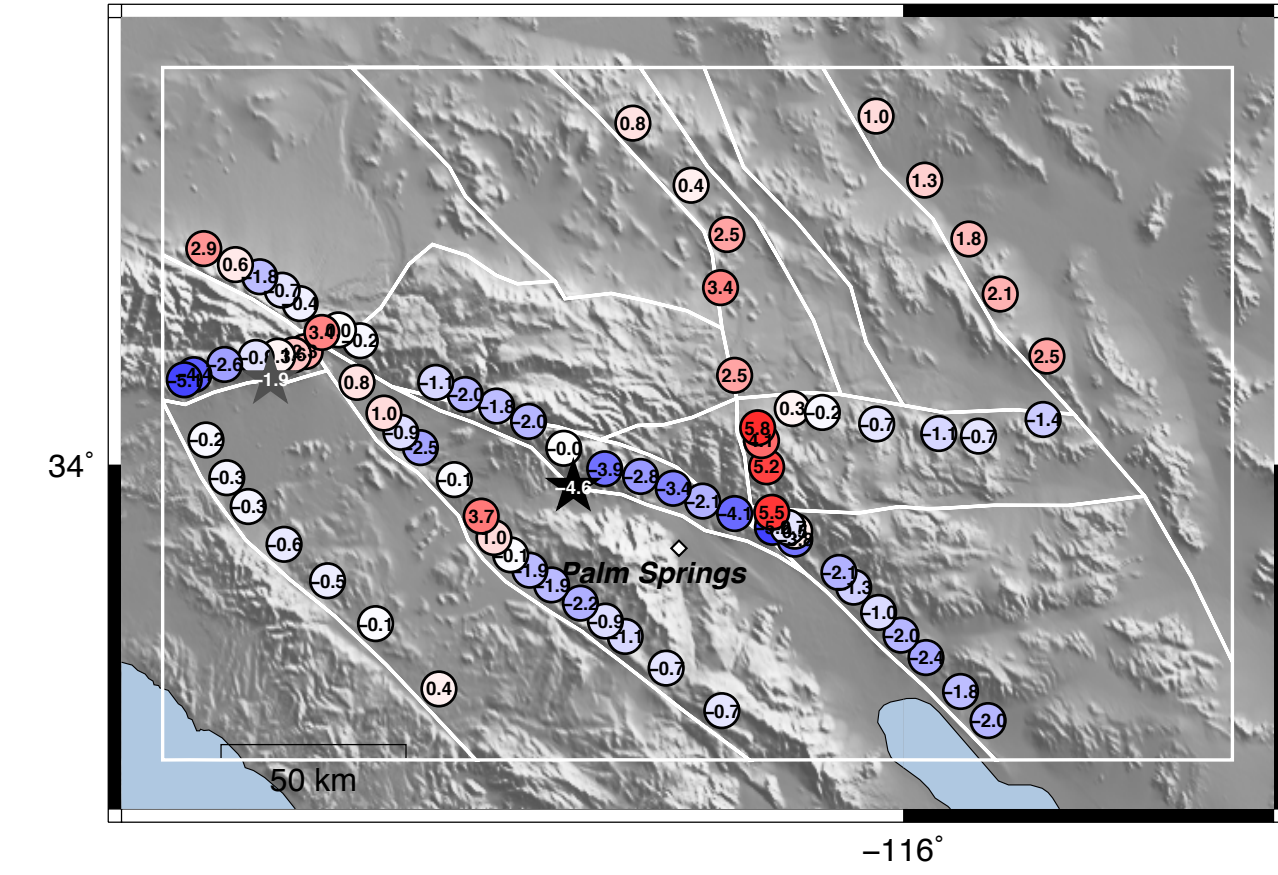

N. SGP14, Postseismic-reduced GPS field

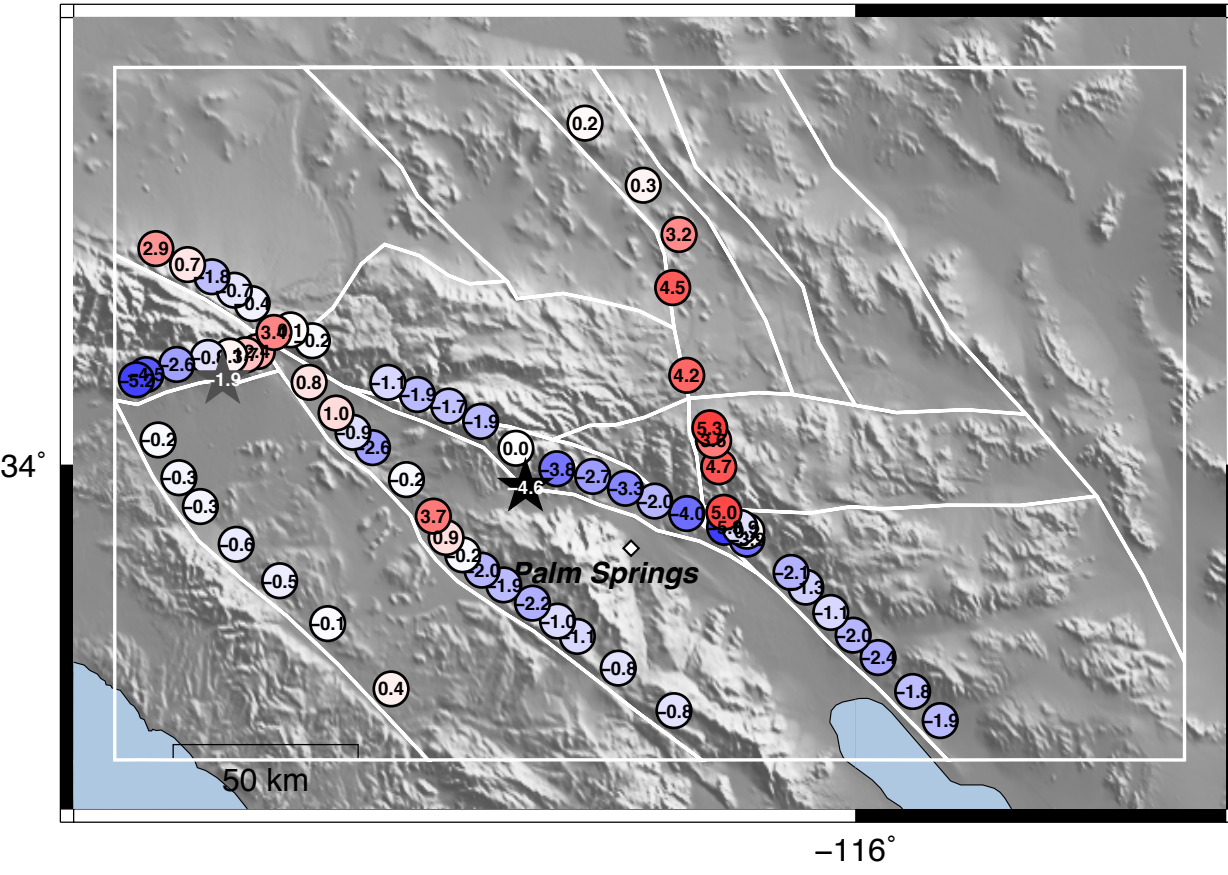

O. SGP15, Postseismic-reduced GPS field

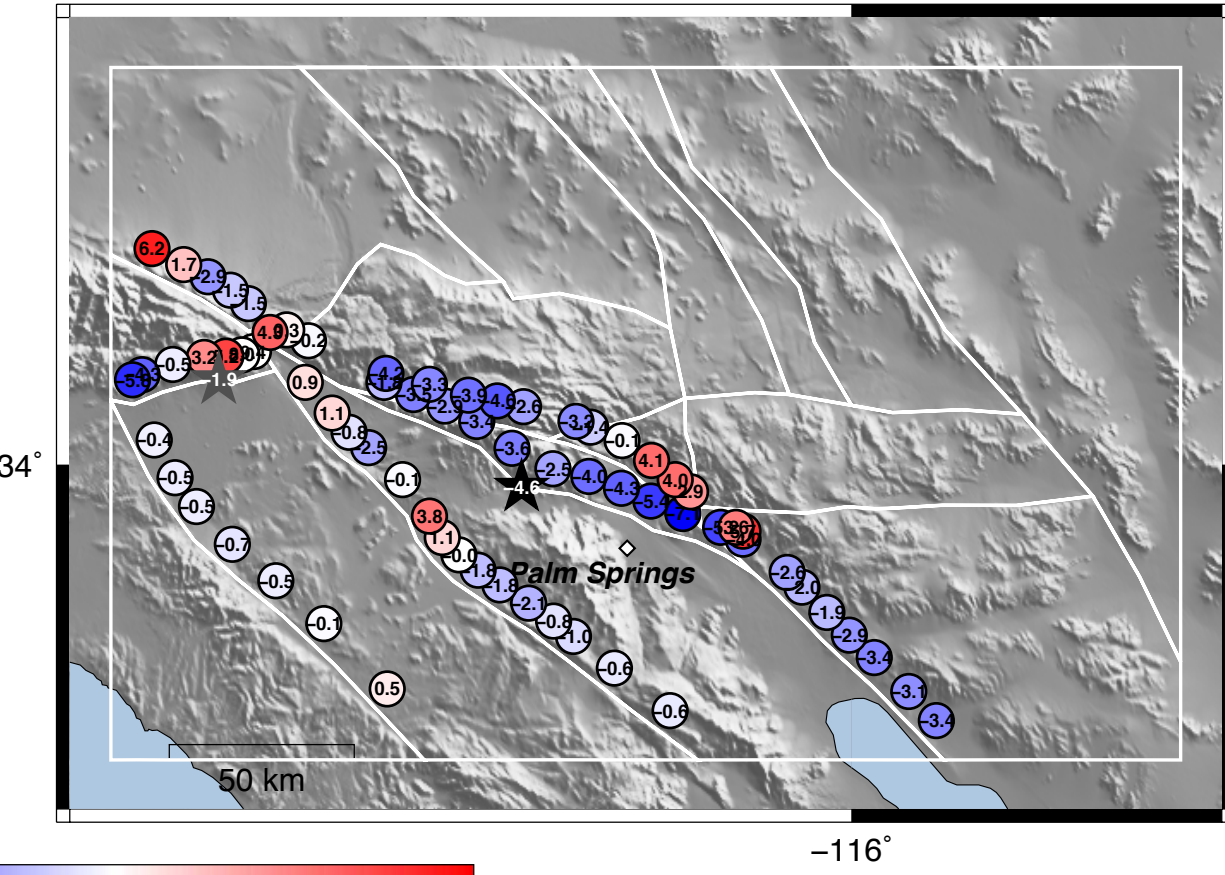

P. SGP16, Postseismic-reduced GPS field

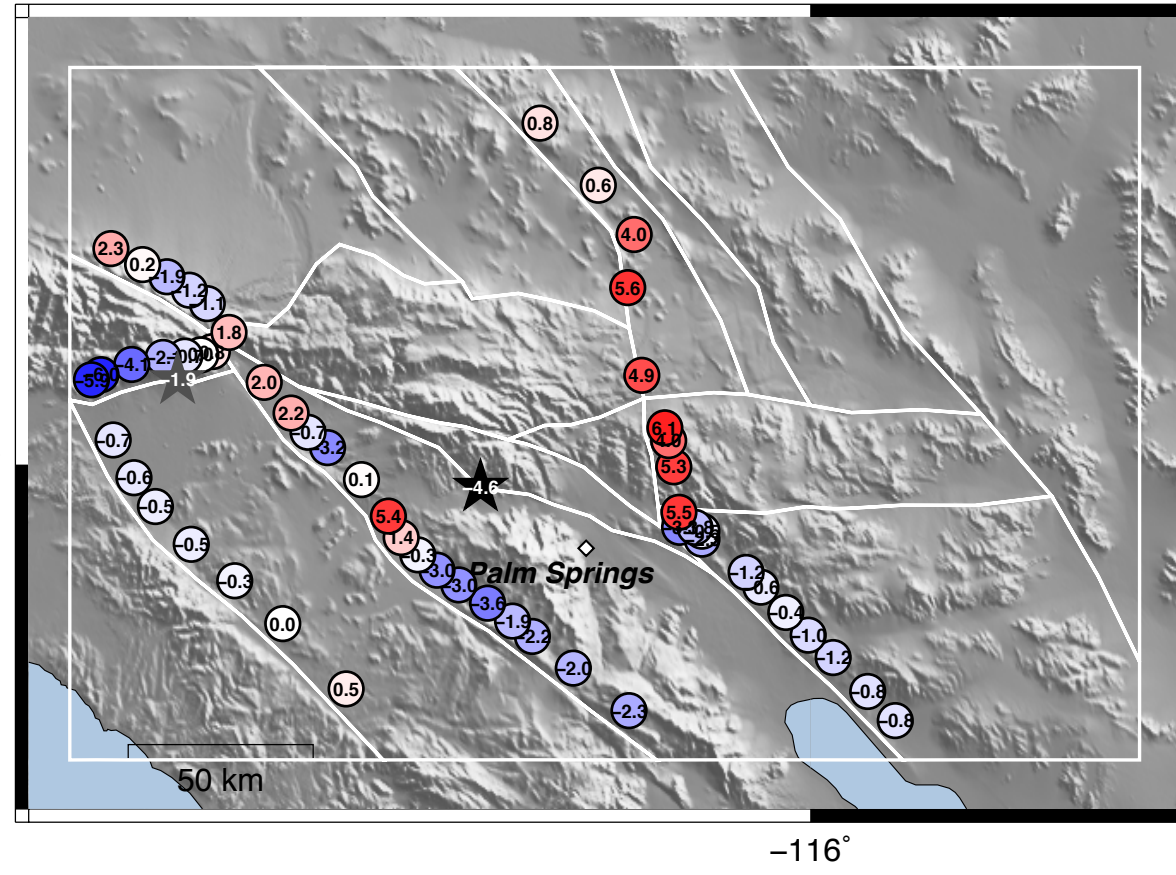

★ Holocene Preferred or Median Geologic Slip Rates  
★ Pleistocene Preferred or Median Geologic Slip Rates

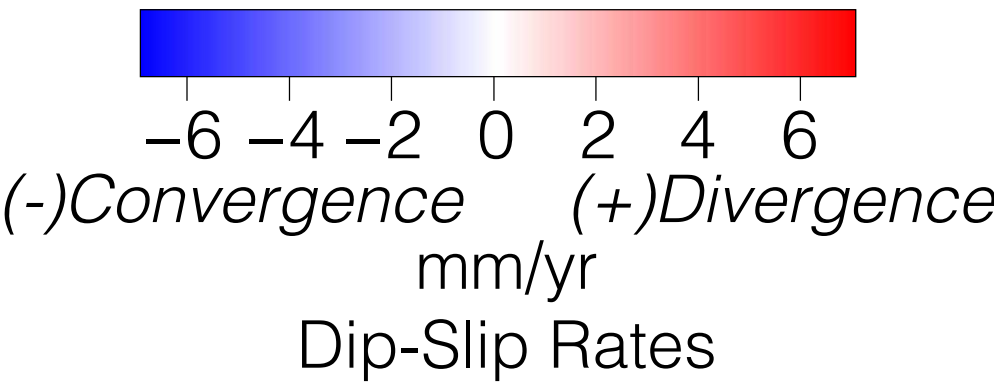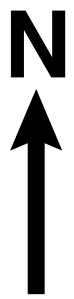

Supplement: Supplementary file 1 [file 2]
