# Supplementary material
Source: publisher figshare collection journal article supplement (https://gsapubs.figshare.com/articles/dataset/_/13123292)

A. SGP1, Observed (unreduced) GPS field

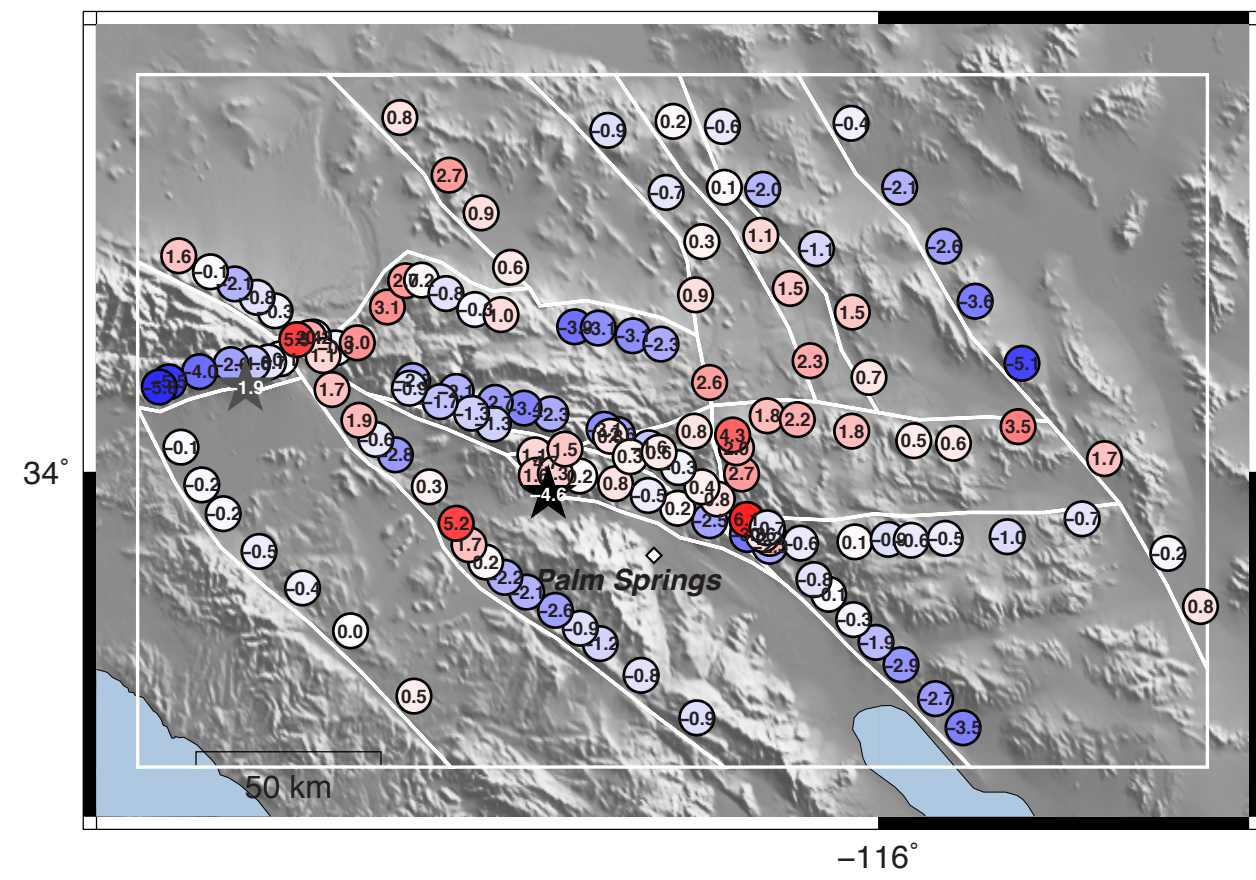

B. SGP2, Observed (unreduced) GPS field

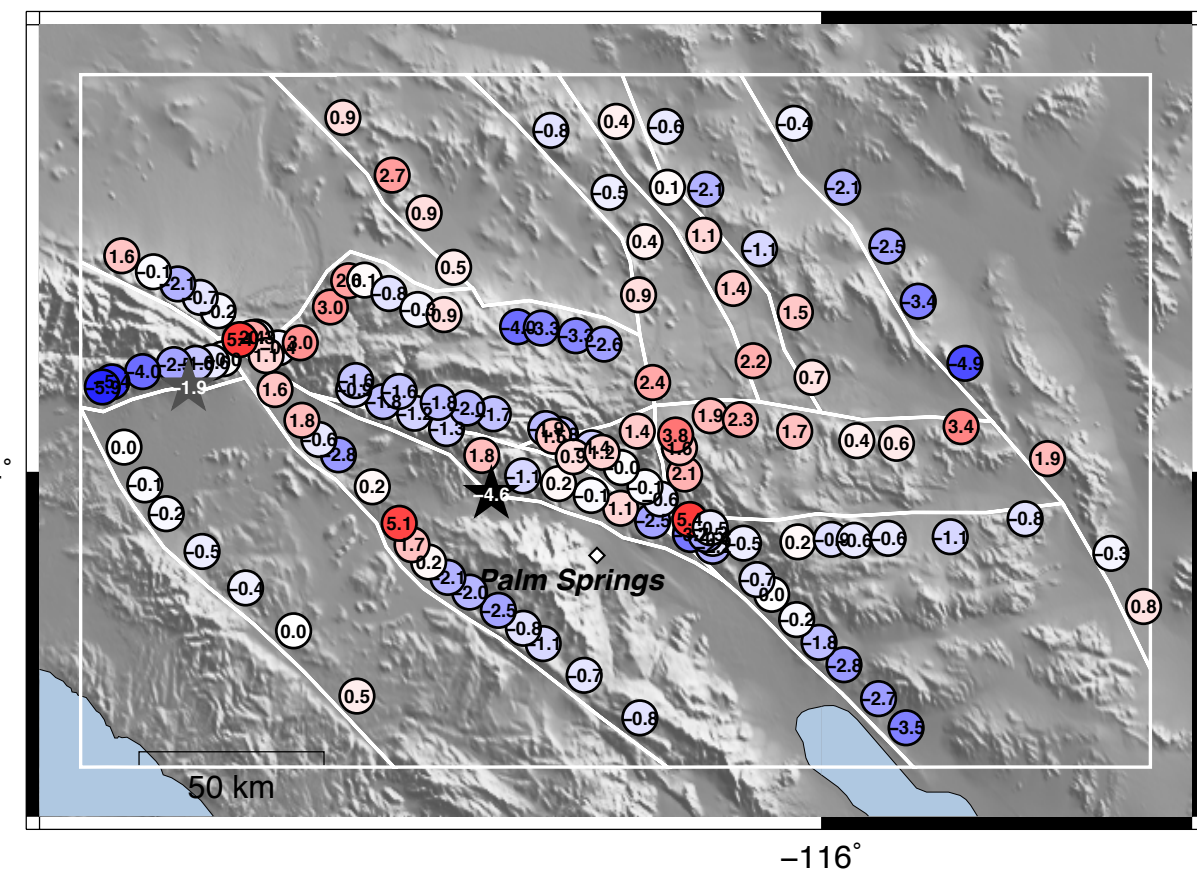

C. SGP3, Observed (unreduced) GPS field

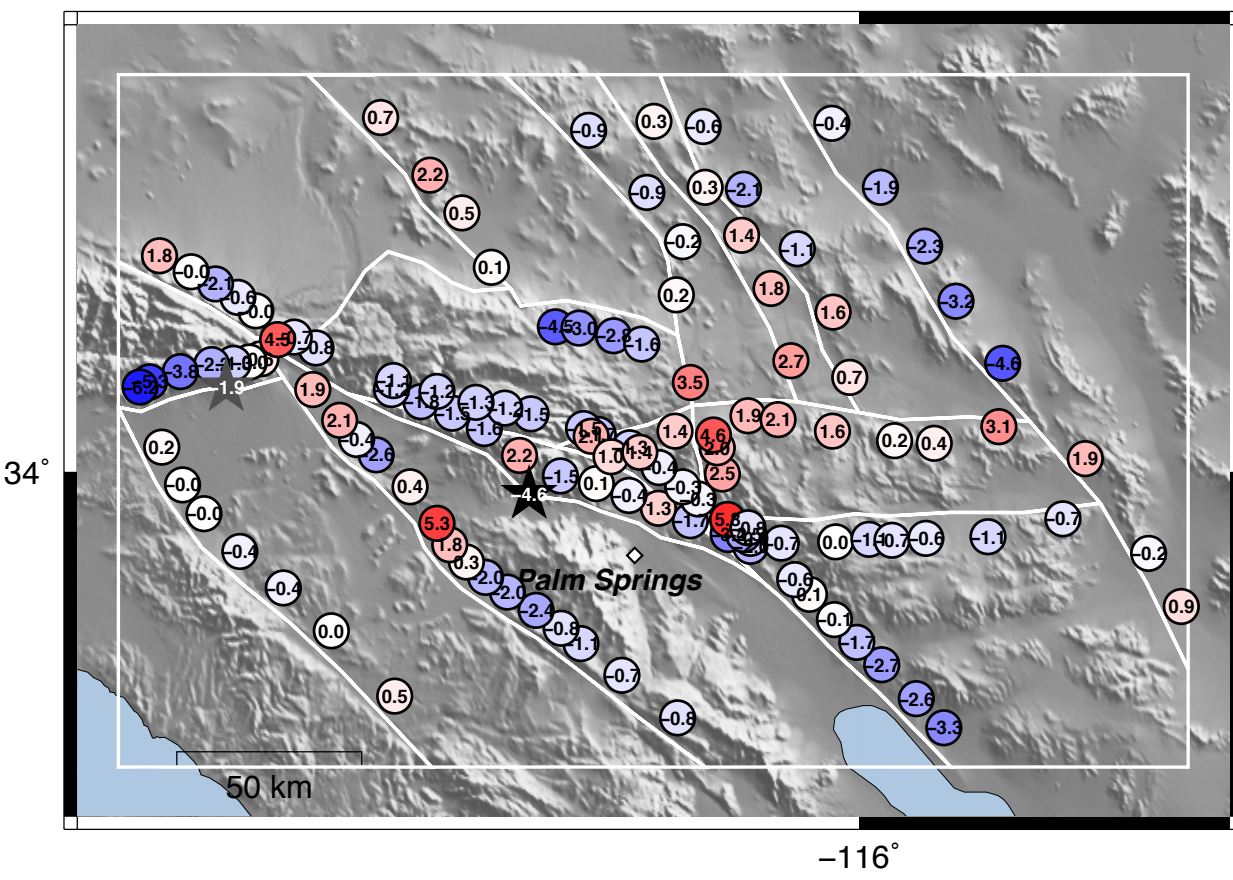

D. SGP4, Observed (unreduced) GPS field

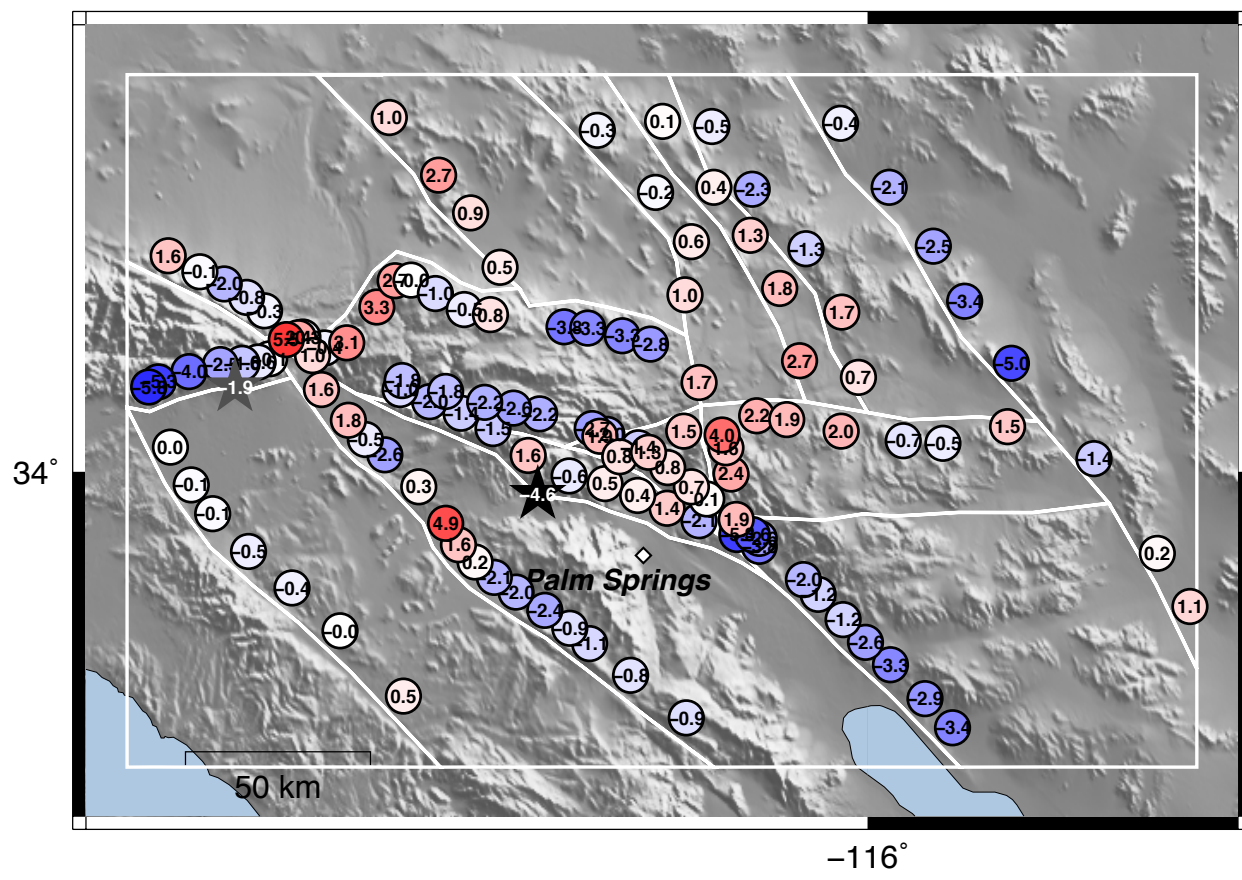

E. SGP5, Observed (unreduced) GPS field

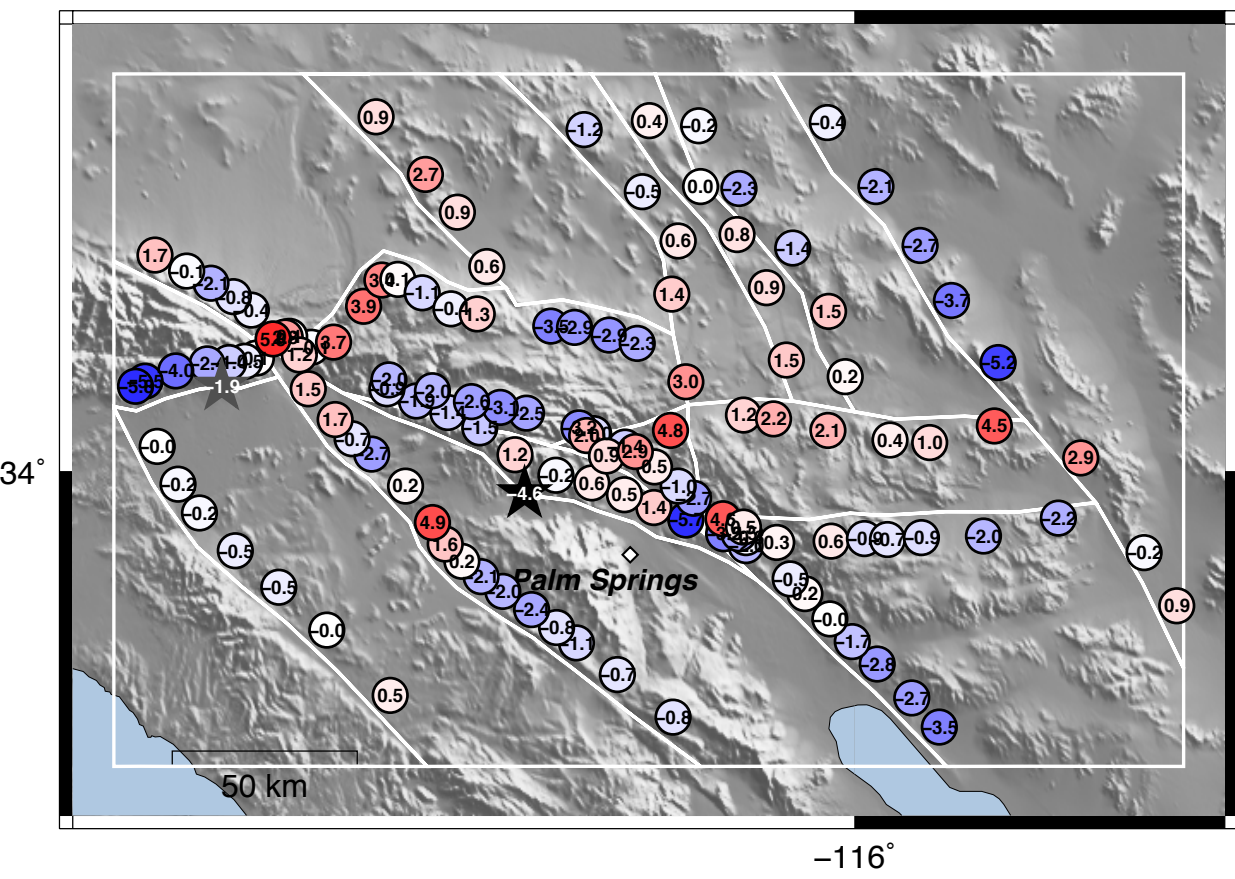

F. SGP6, Observed (unreduced) GPS field

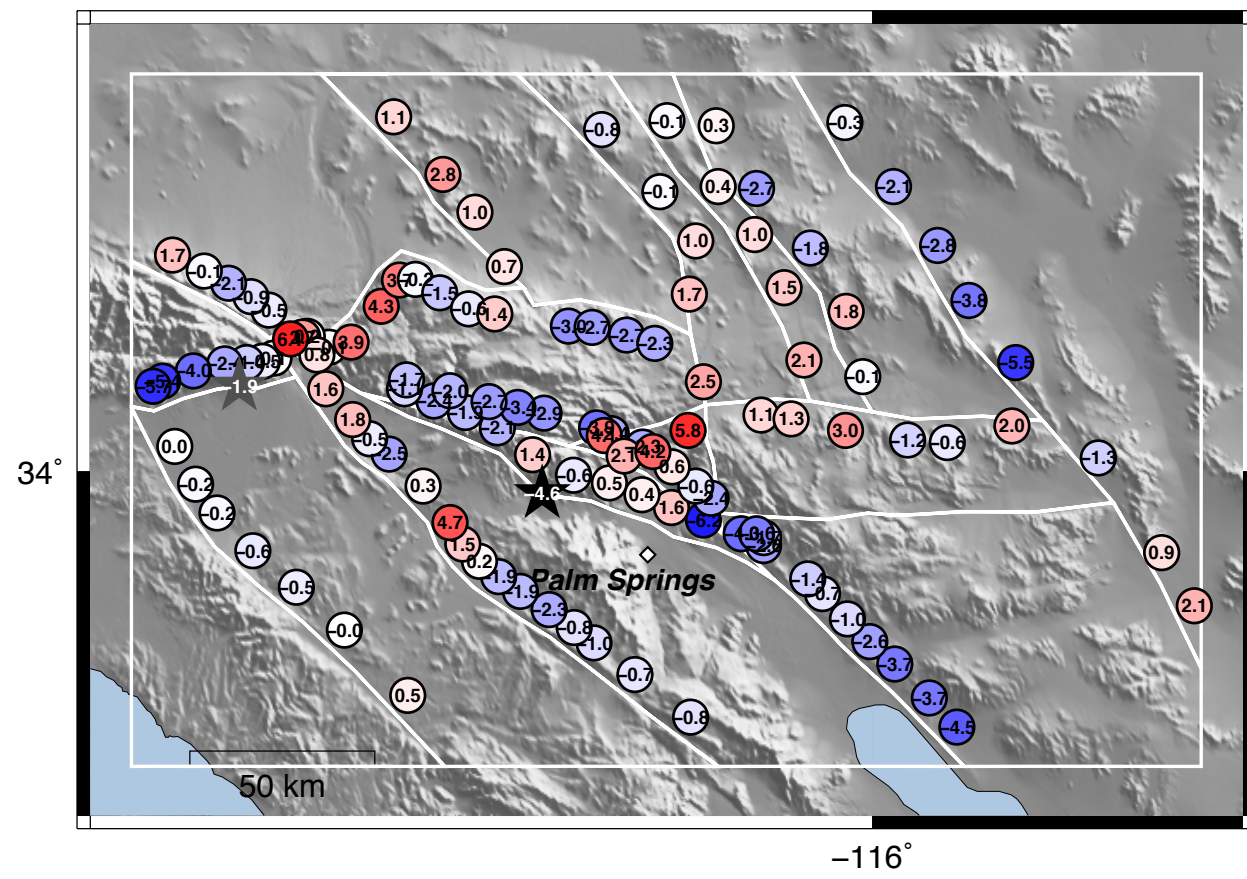

G. SGP7, Observed (unreduced) GPS field

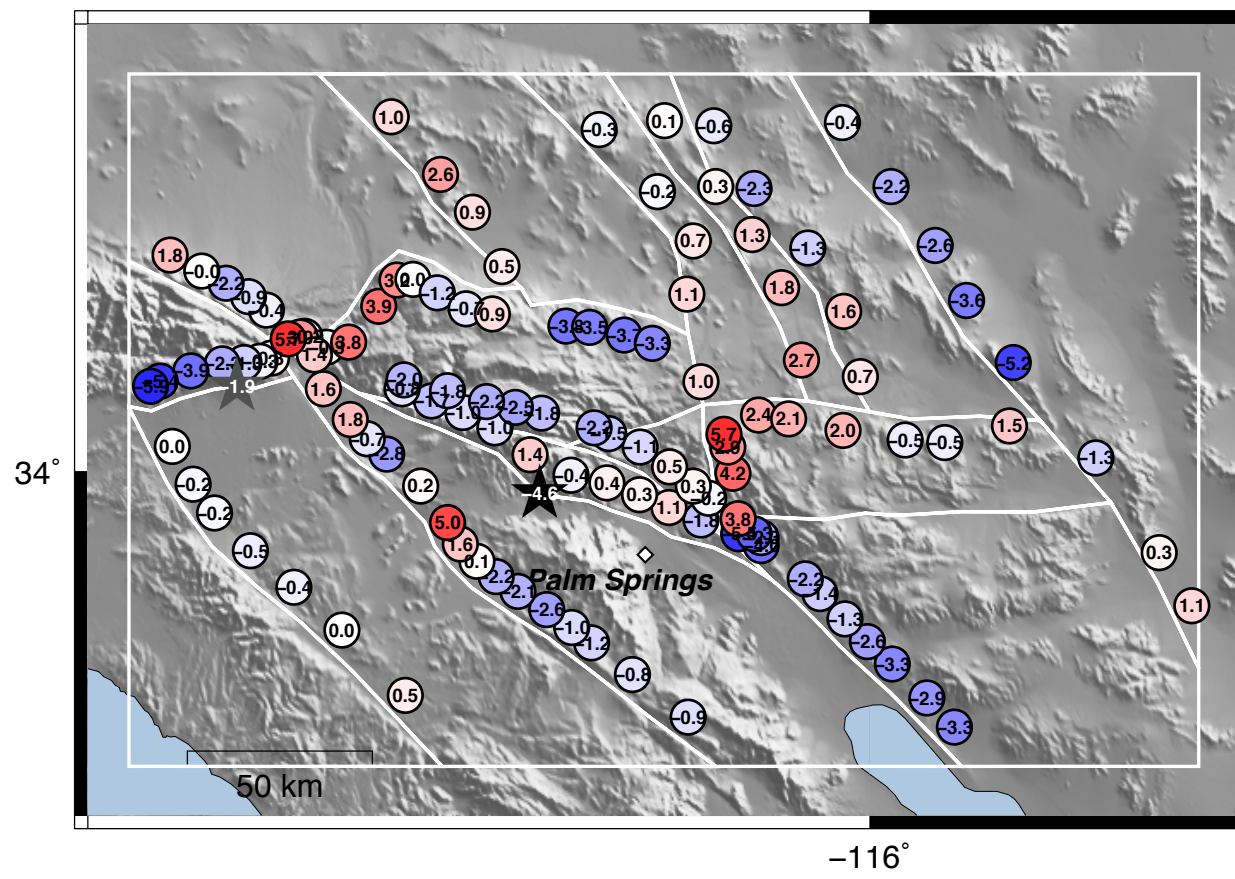

H. SGP8, Observed (unreduced) GPS field

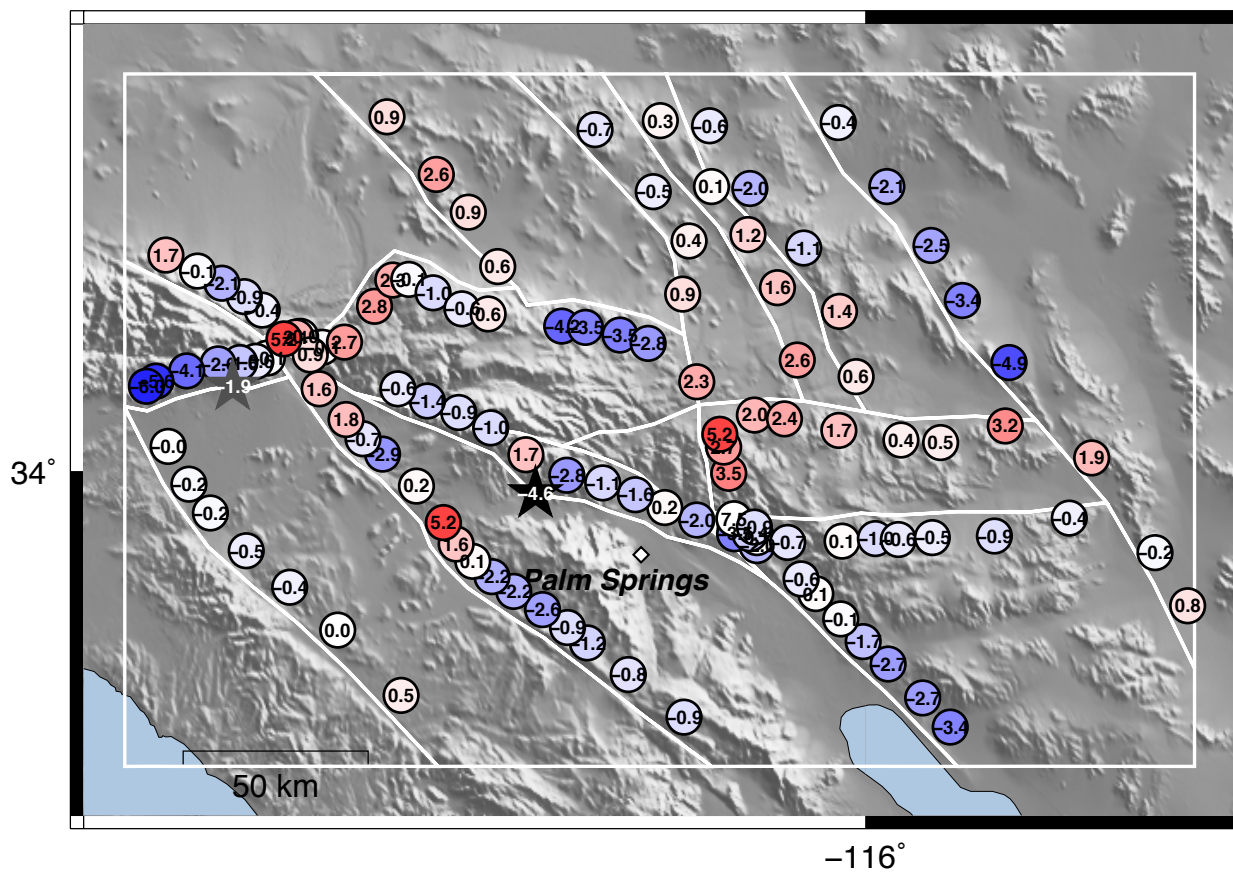

I. SGP9, Observed (unreduced) GPS field

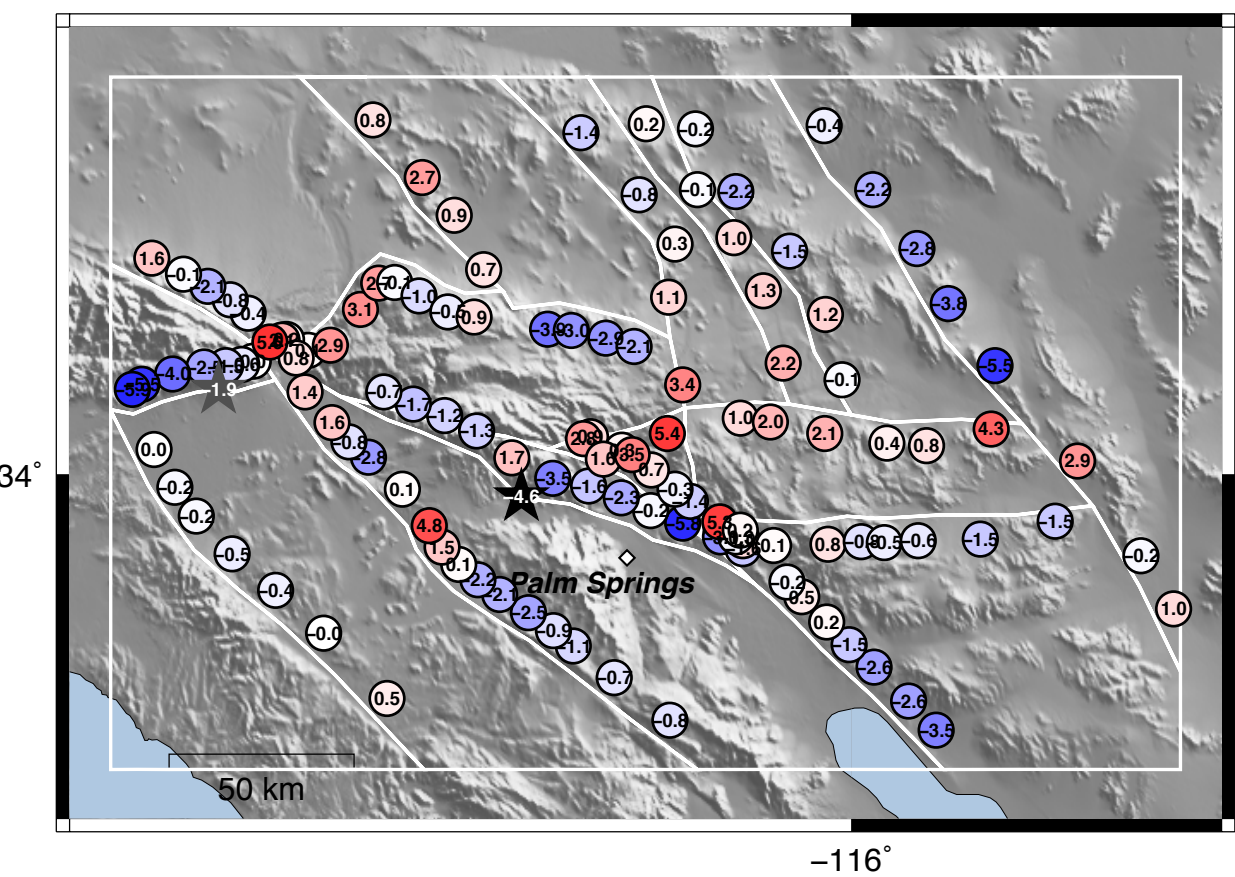

J. SGP10, Observed (unreduced) GPS field

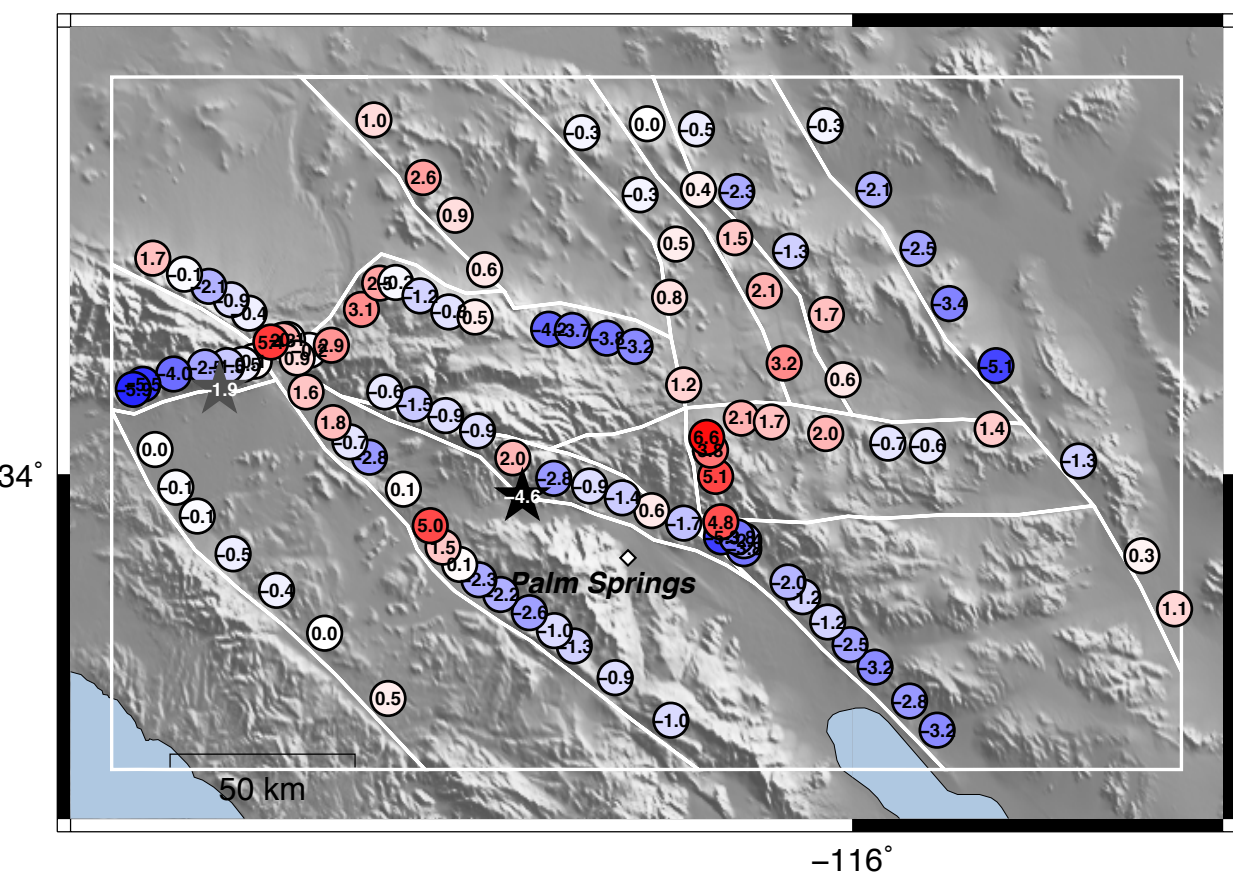

K. SGP11, Observed (unreduced) GPS field

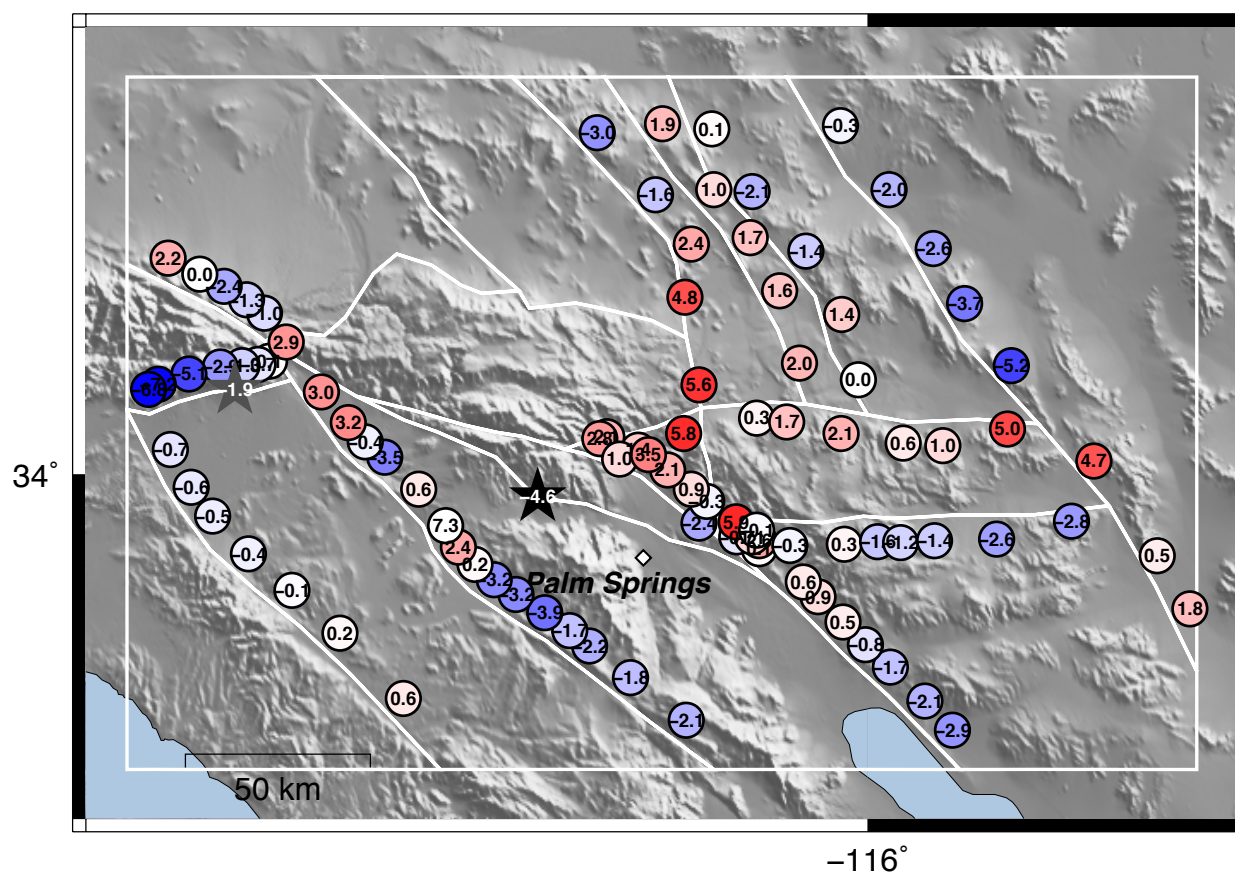

L. SGP12, Observed (unreduced) GPS field

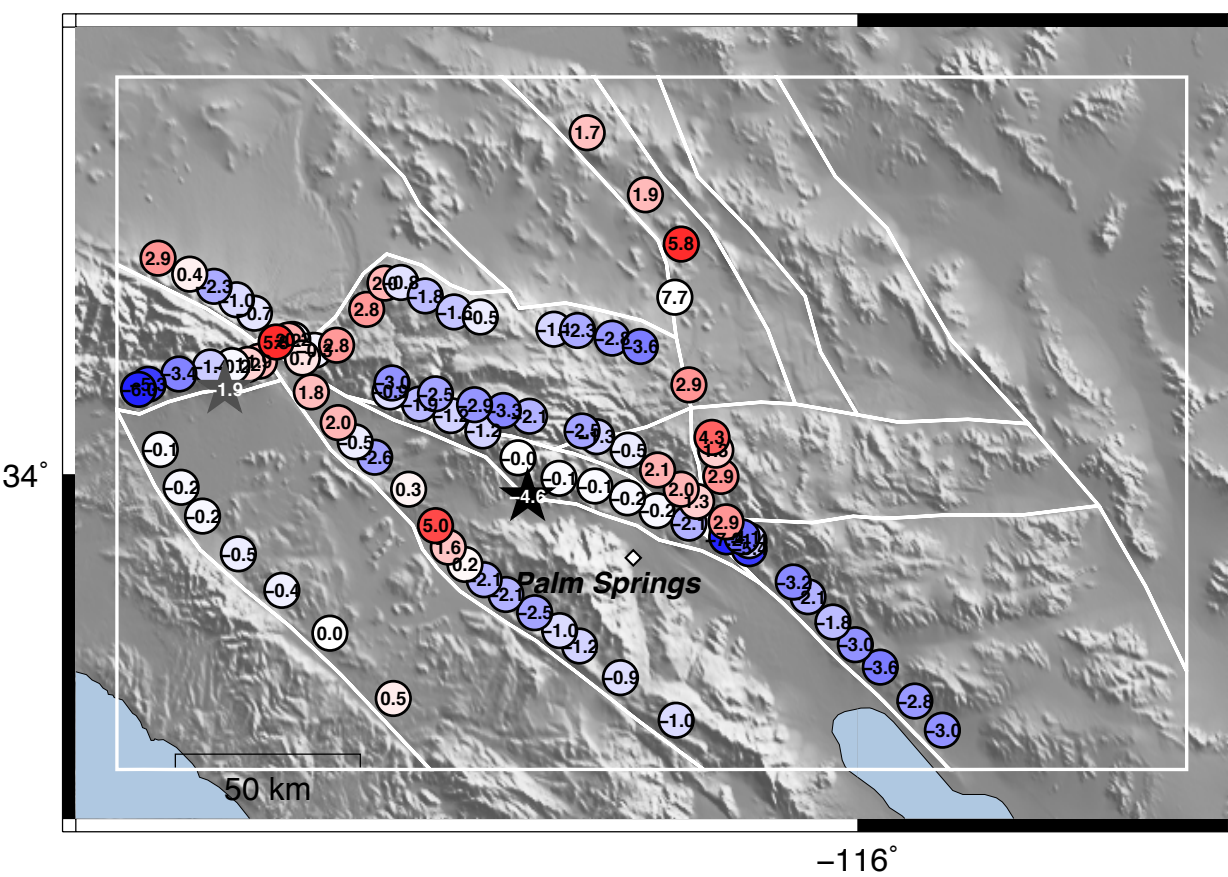

M. SGP13, Observed (unreduced) GPS field

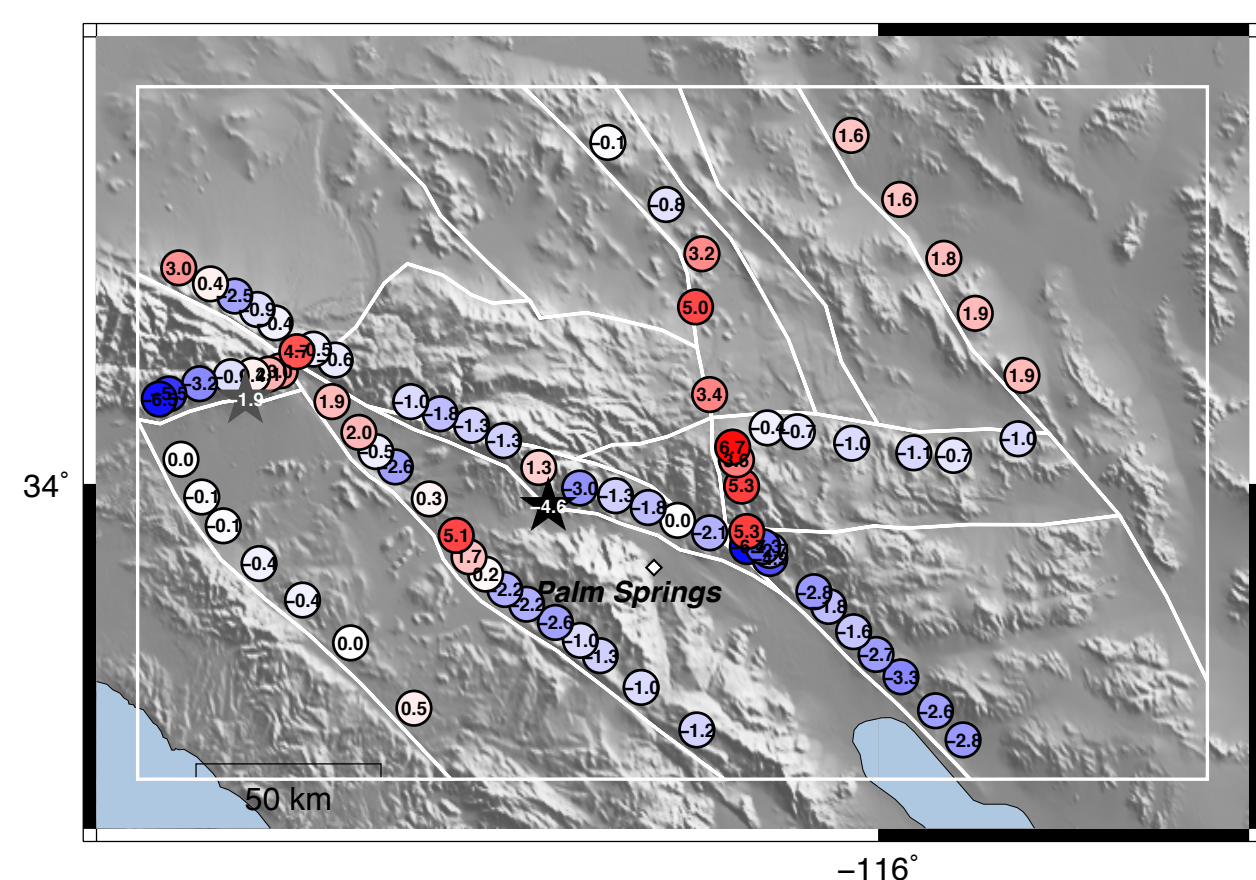

N. SGP14, Observed (unreduced) GPS field

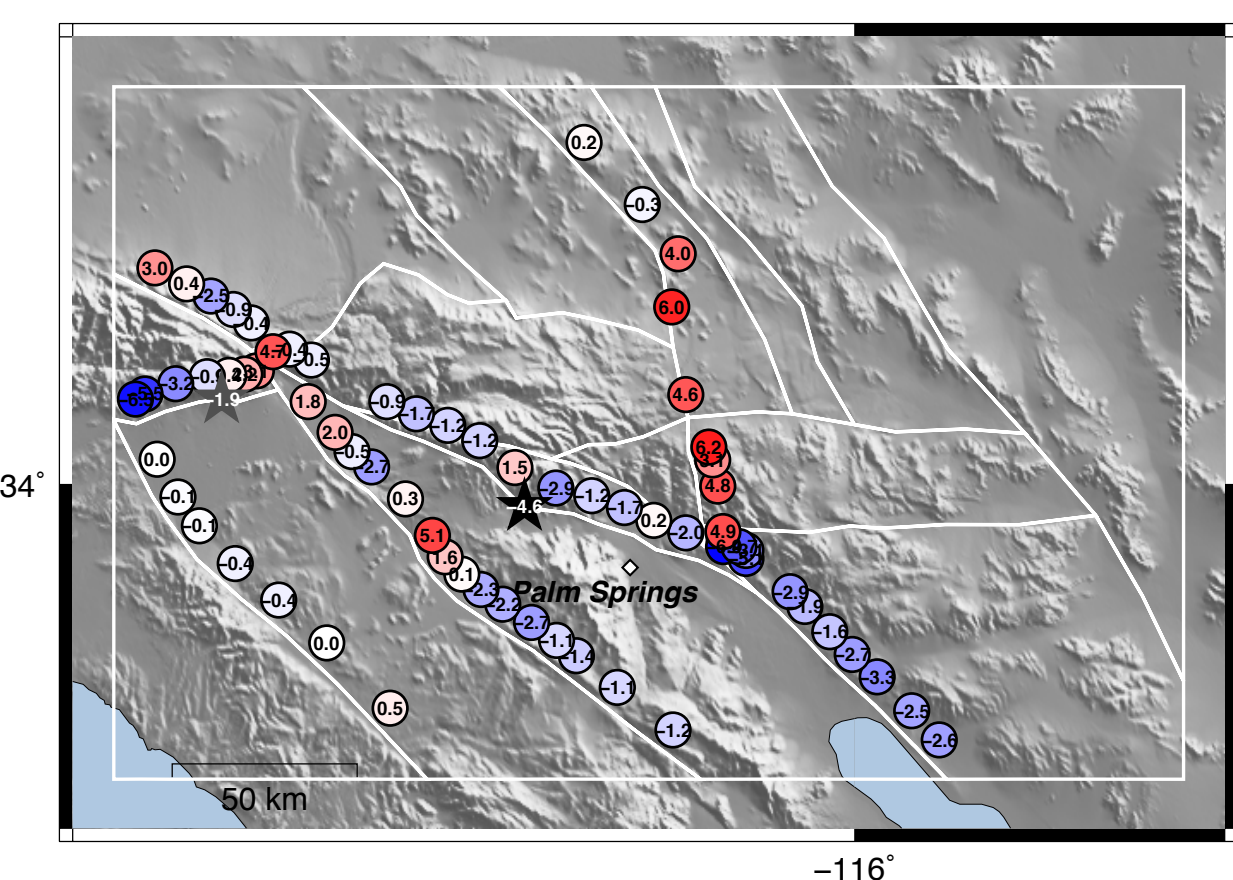

O. SGP15, Observed (unreduced) GPS field

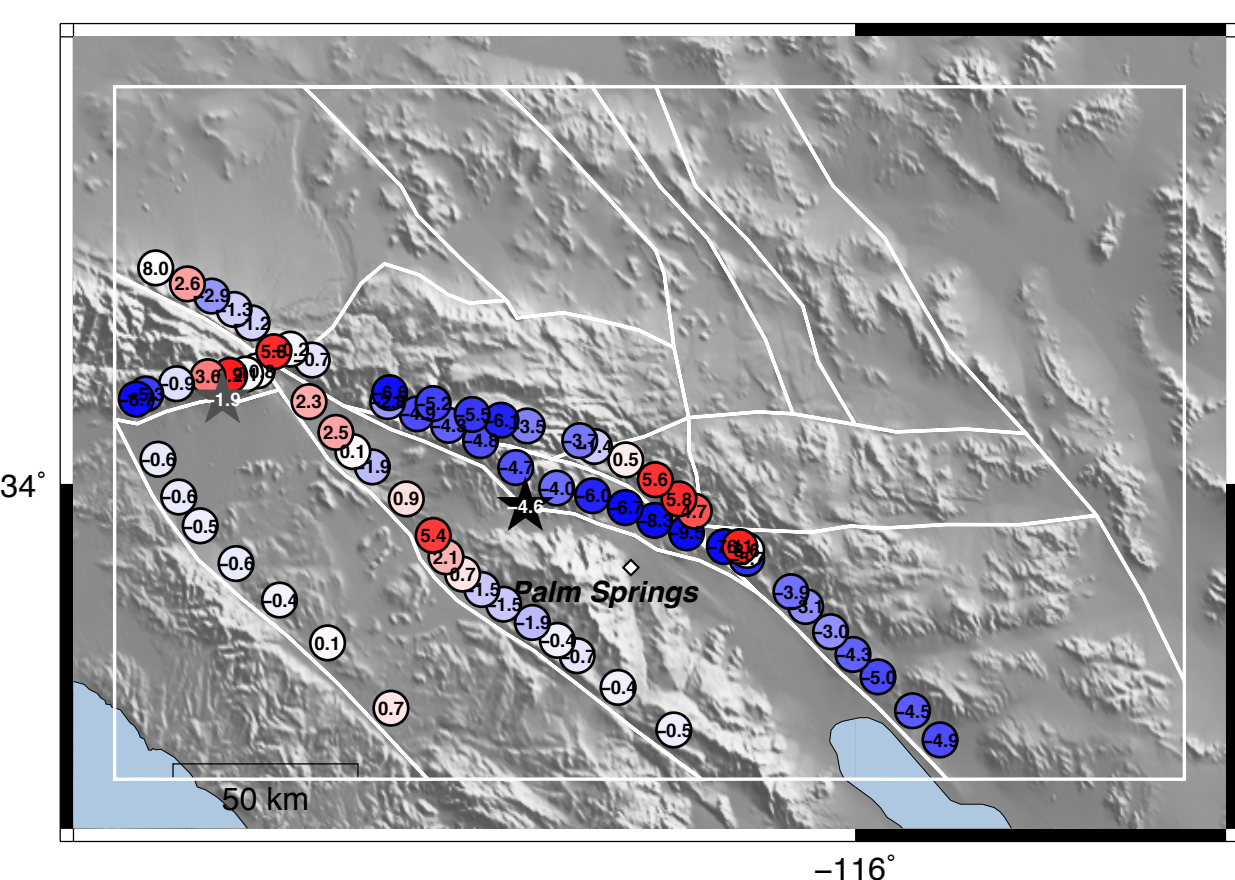

P. SGP16, Observed (unreduced) GPS field

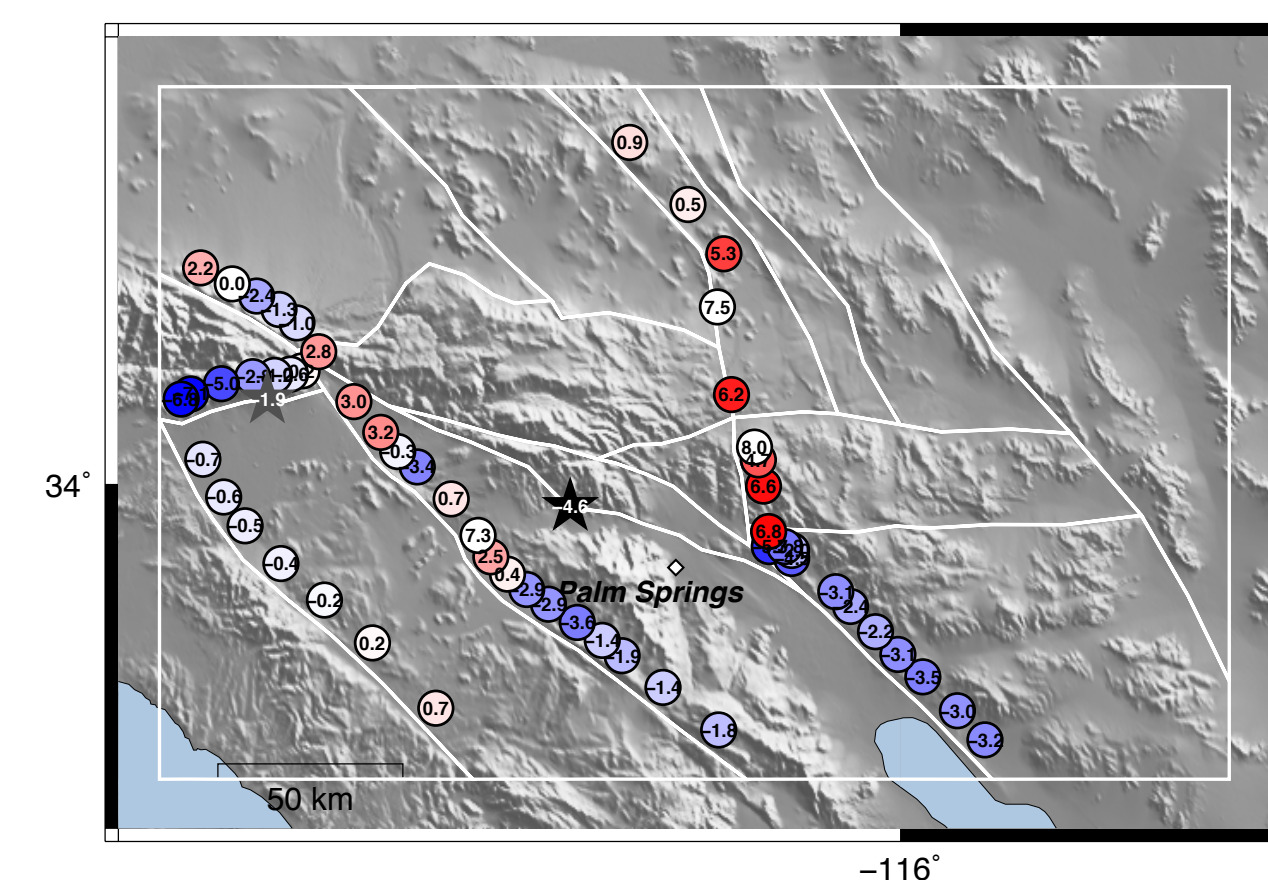

★ Holocene Preferred or Median Geologic Slip Rates  
★ Pleistocene Preferred or Median Geologic Slip Rates

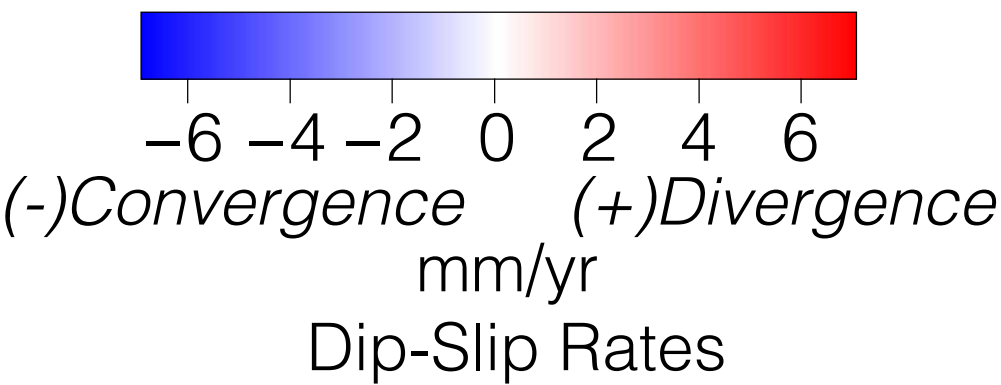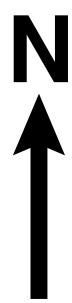

Supplement: Supplementary file 4 [file 2]
