# Supplementary material
Source: publisher figshare collection journal article supplement (https://gsapubs.figshare.com/articles/dataset/_/13123292)

A. SGP1, Observed (unreduced) GPS field

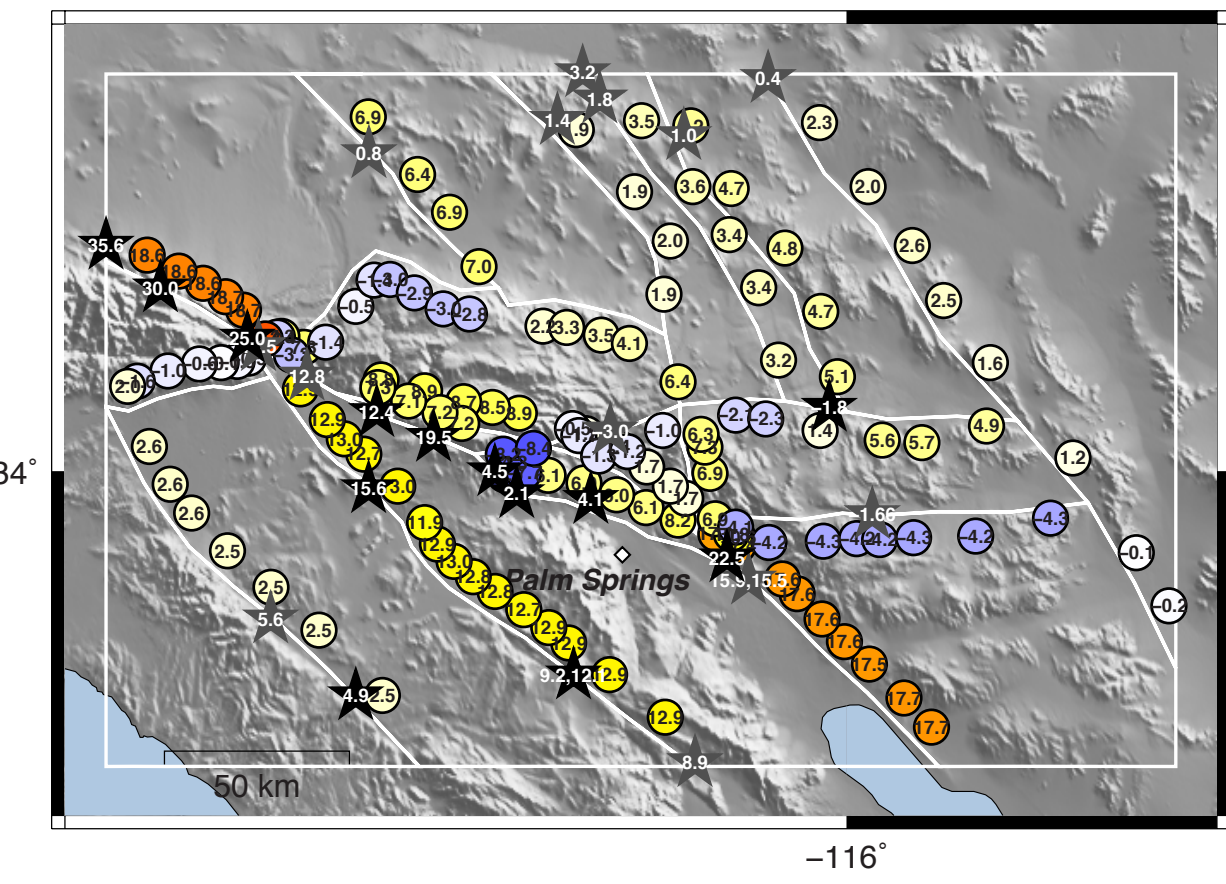

B. SGP2, Observed (unreduced) GPS field

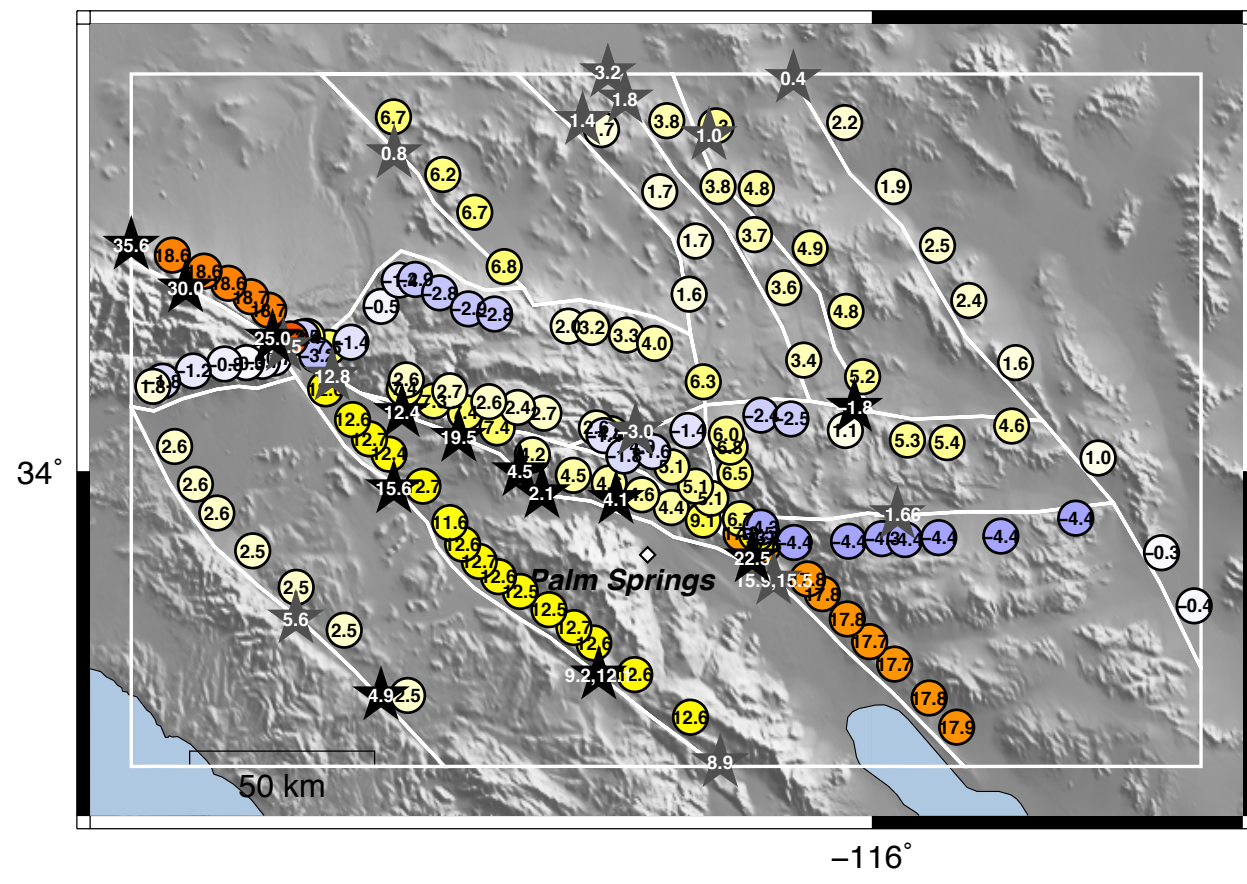

C. SGP3, Observed (unreduced) GPS field

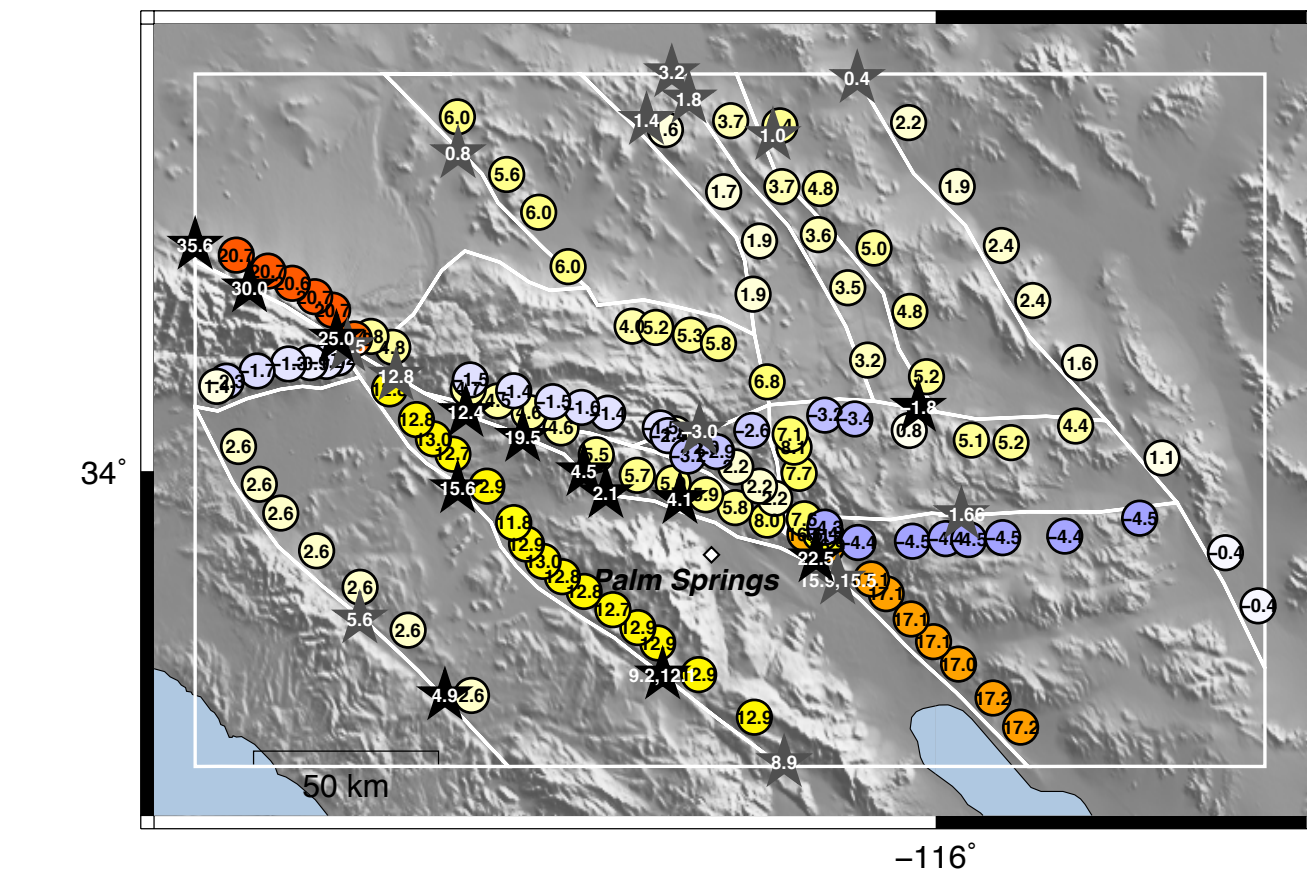

D. SGP4, Observed (unreduced) GPS field

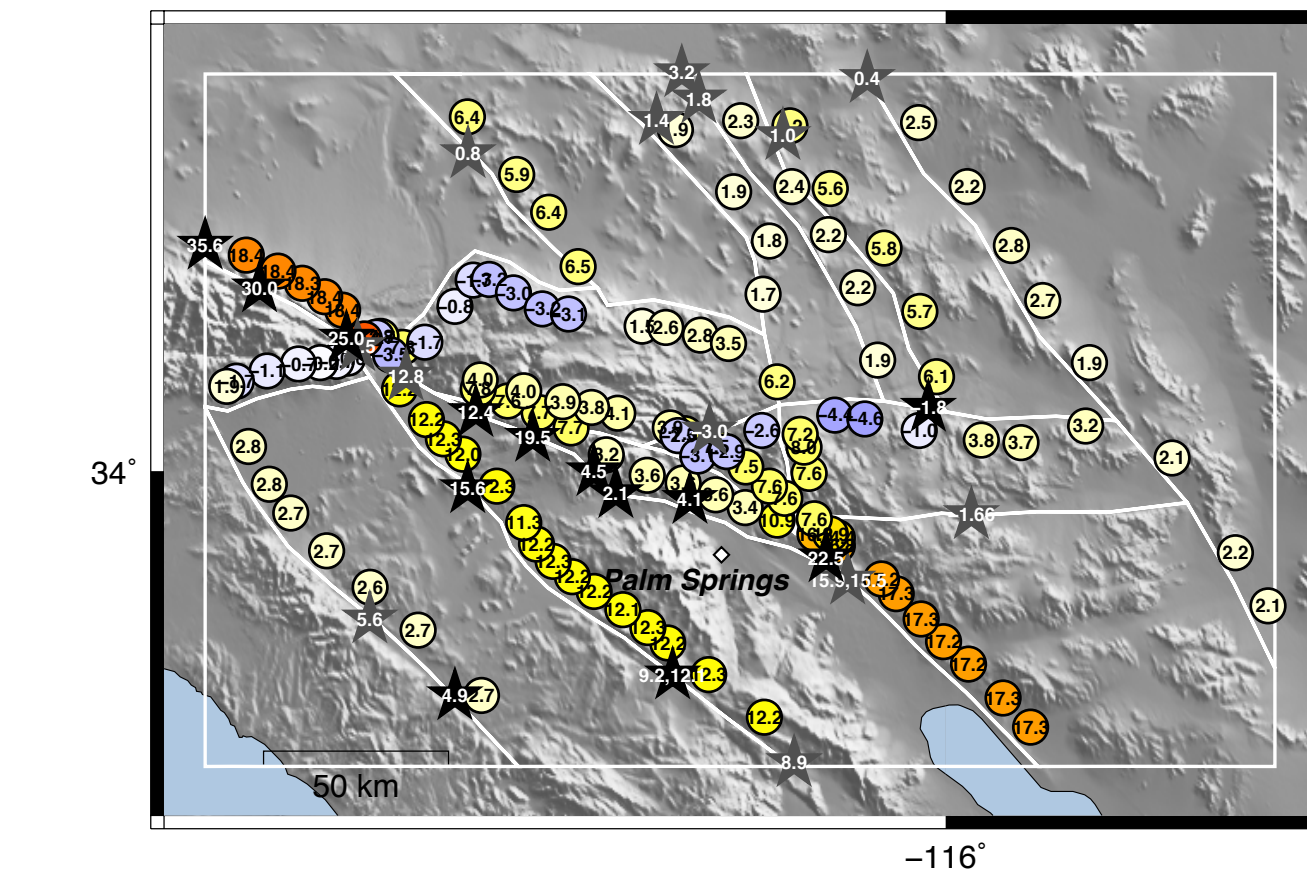

E. SGP5, Observed (unreduced) GPS field

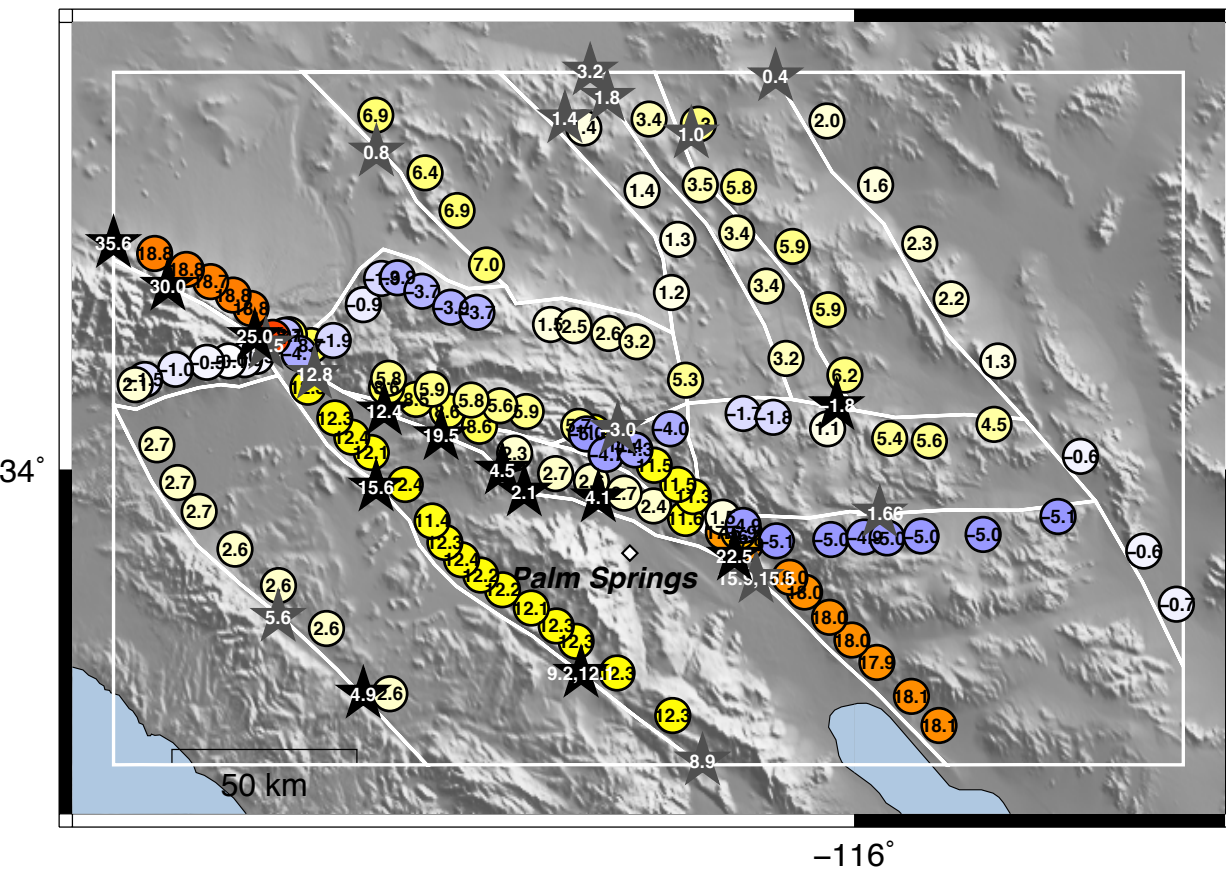

F. SGP6, Observed (unreduced) GPS field

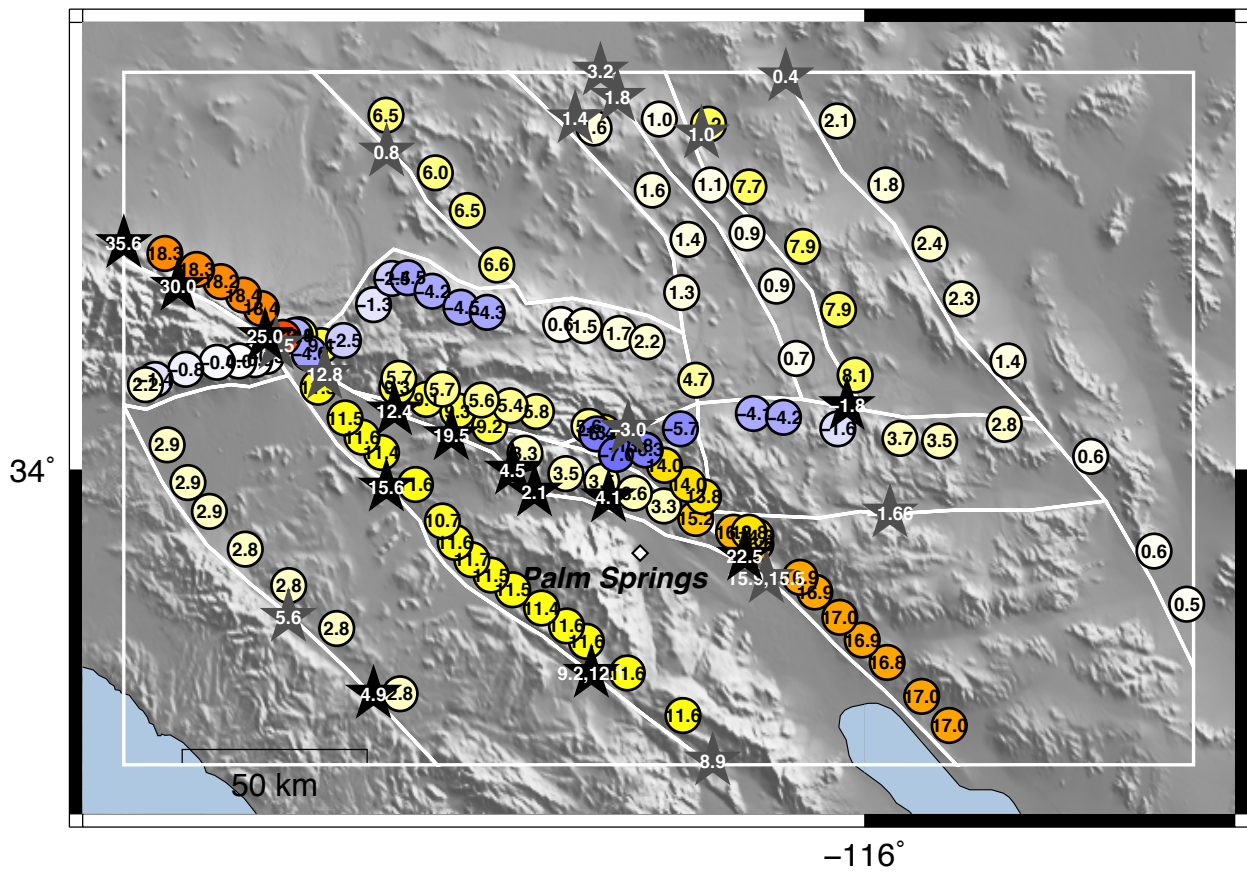

G. SGP7, Observed (unreduced) GPS field

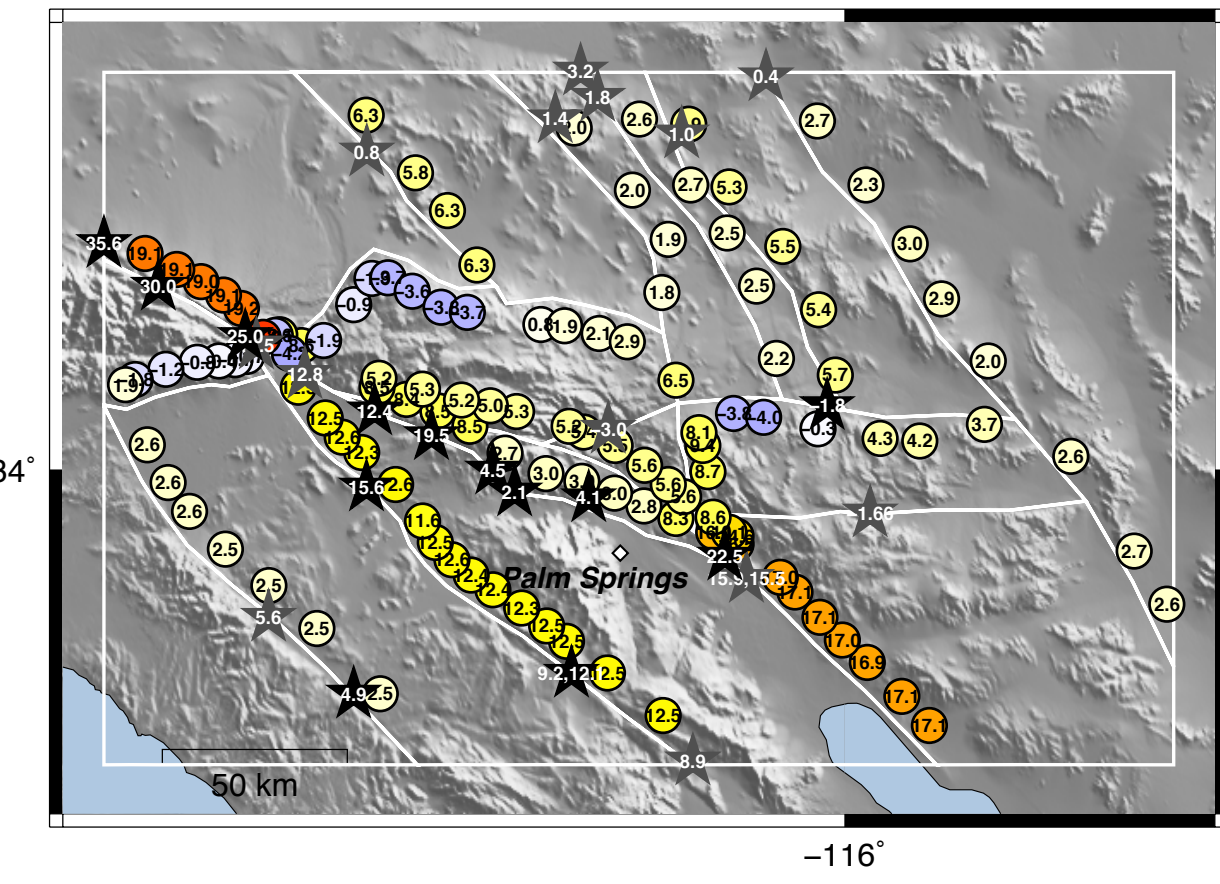

H. SGP8, Observed (unreduced) GPS field

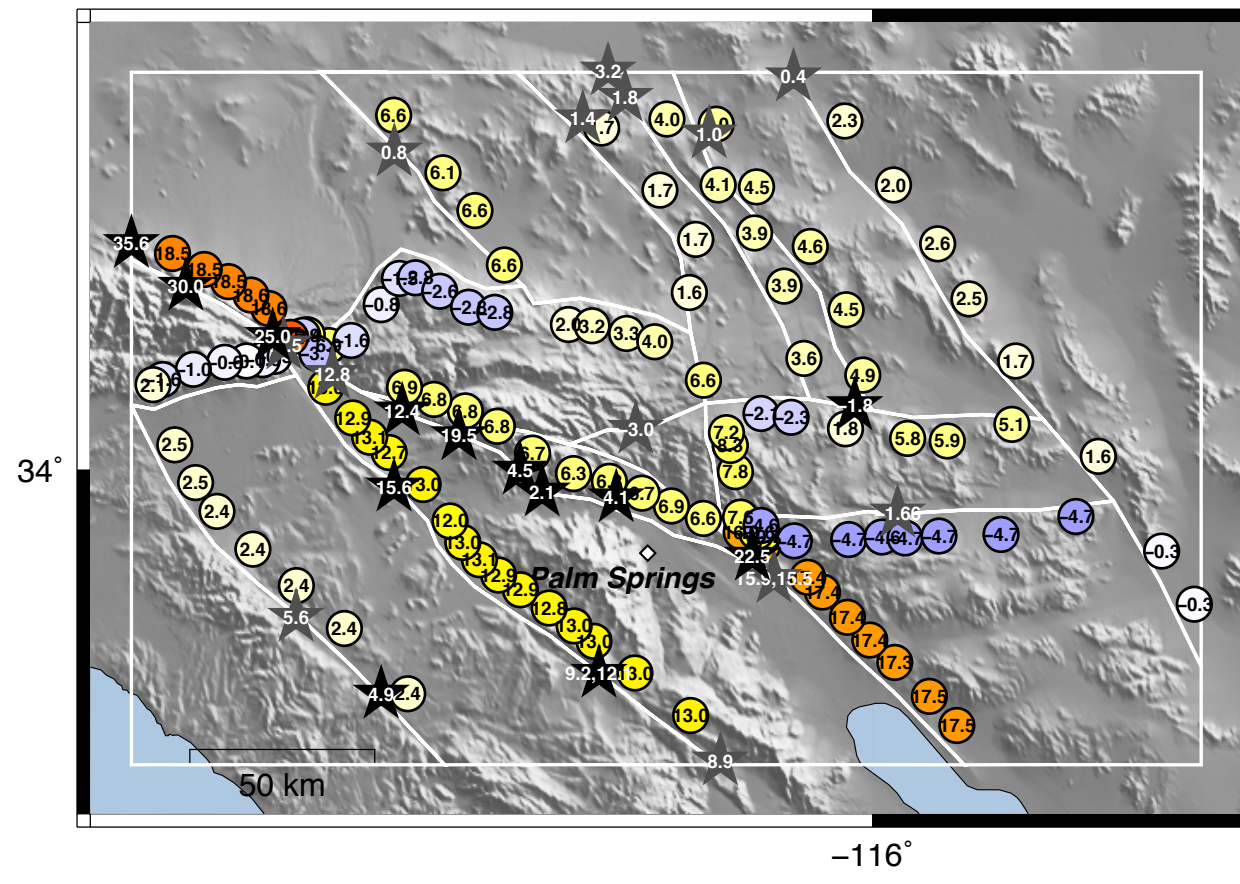

I. SGP9, Observed (unreduced) GPS field

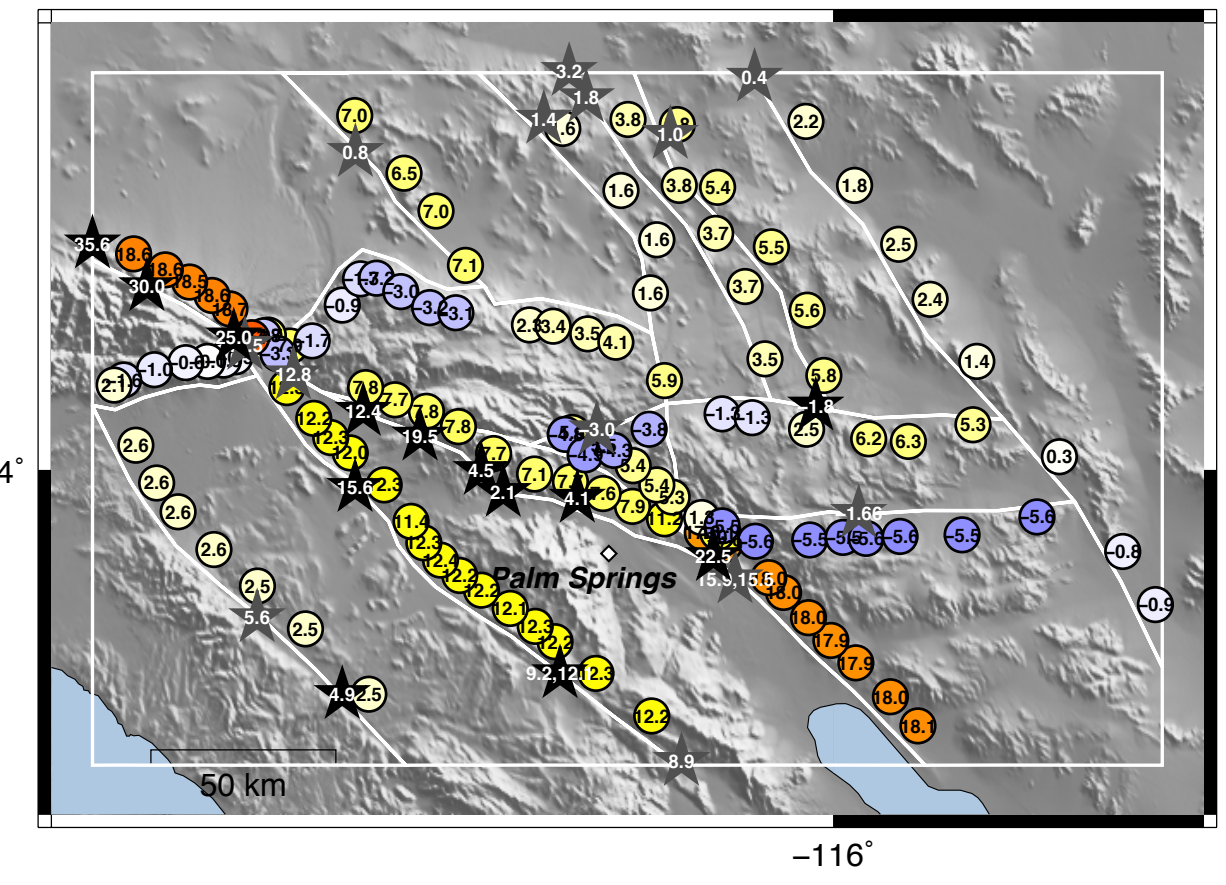

J. SGP10, Observed (unreduced) GPS field

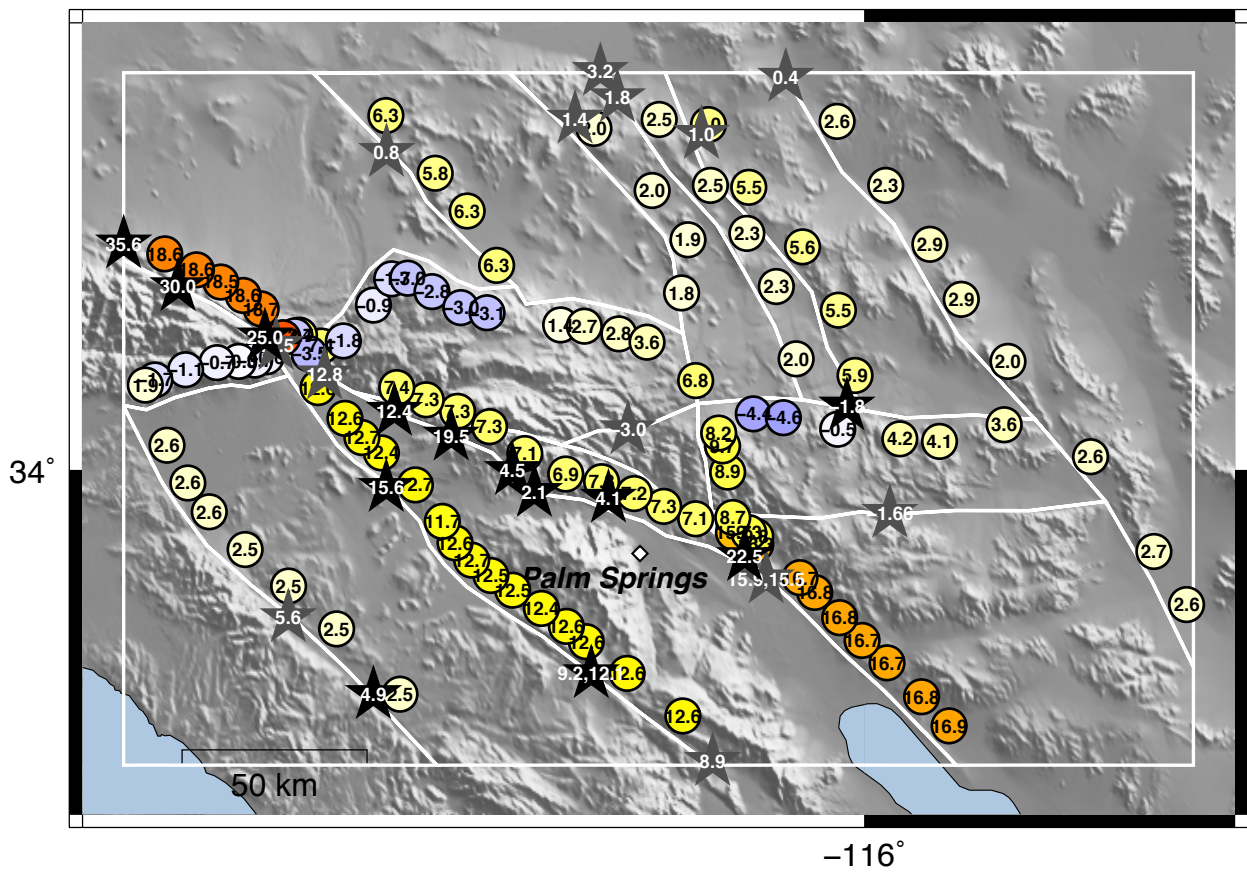

K. SGP11, Observed (unreduced) GPS field

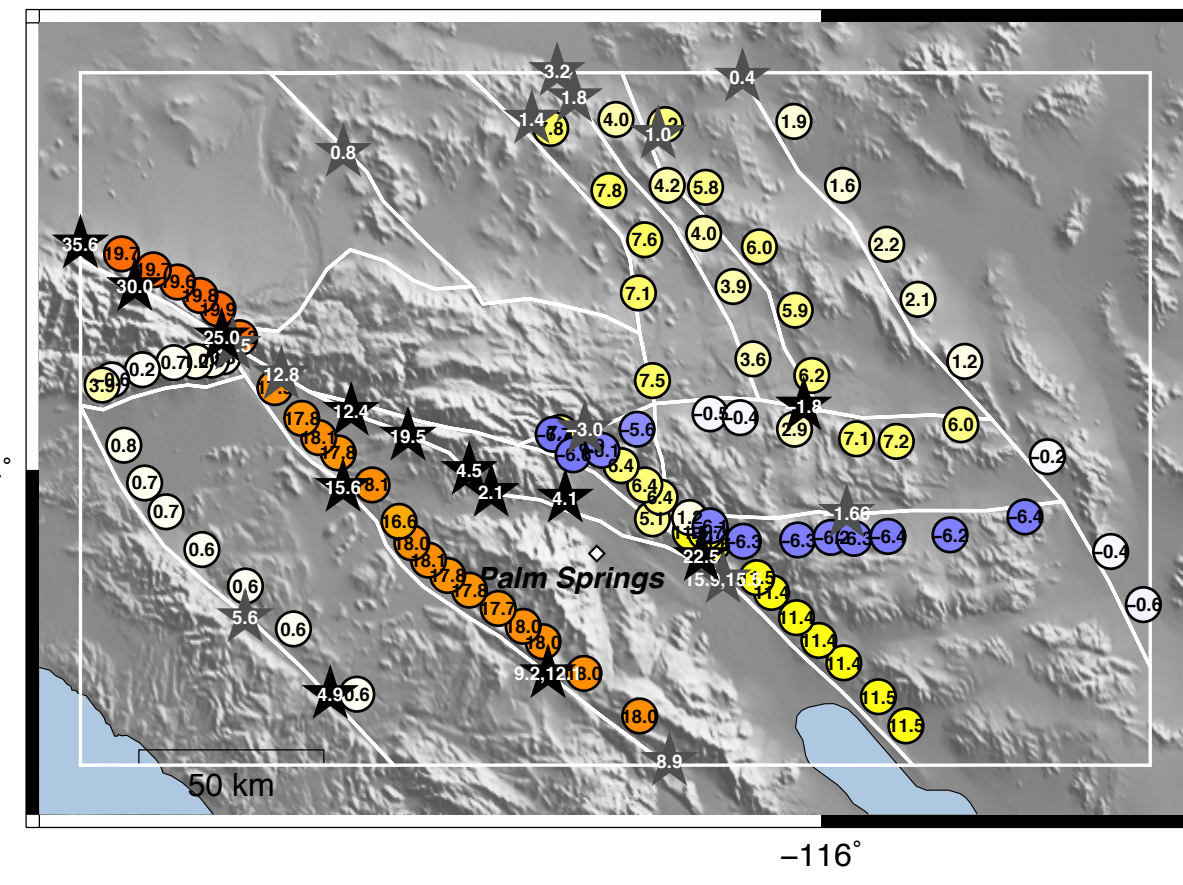

L. SGP12, Observed (unreduced) GPS field

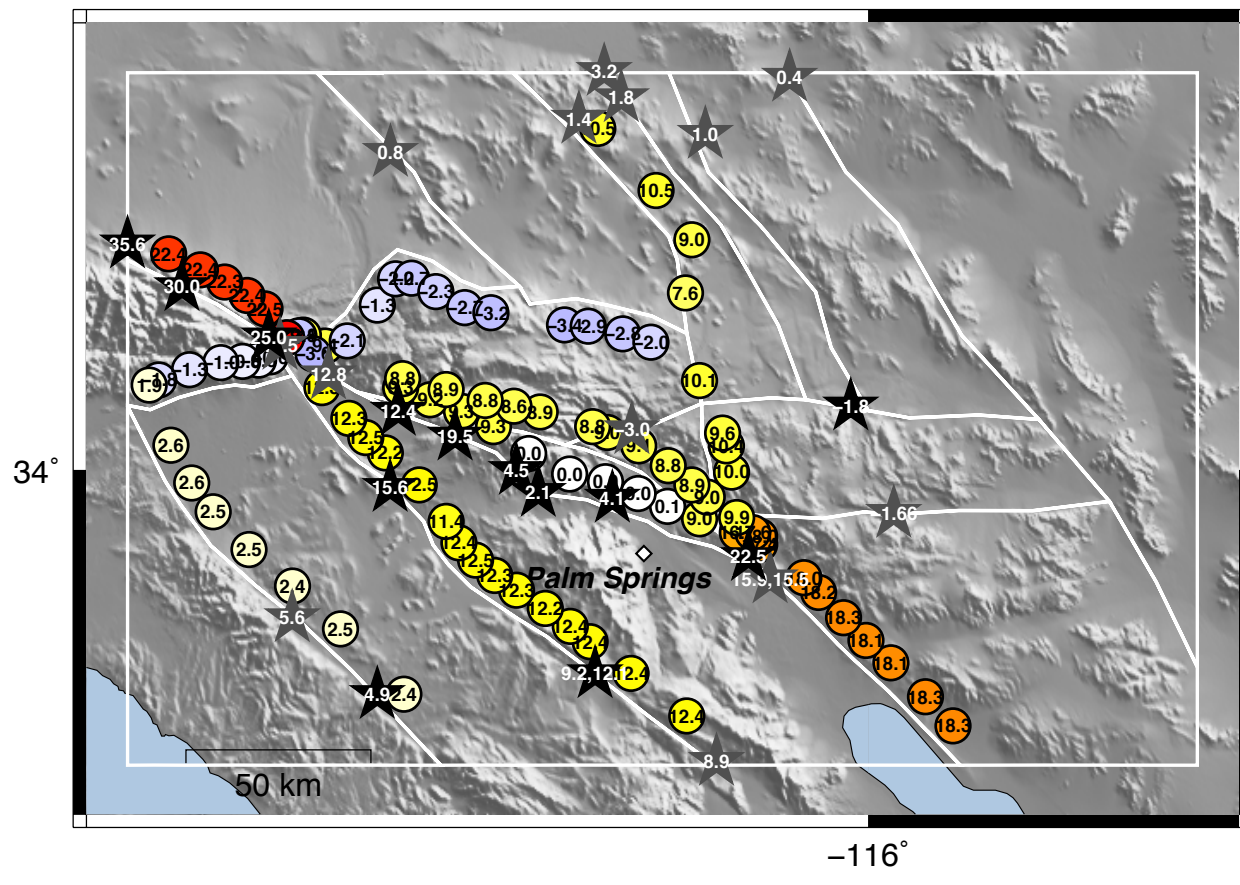

M. SGP13, Observed (unreduced) GPS field

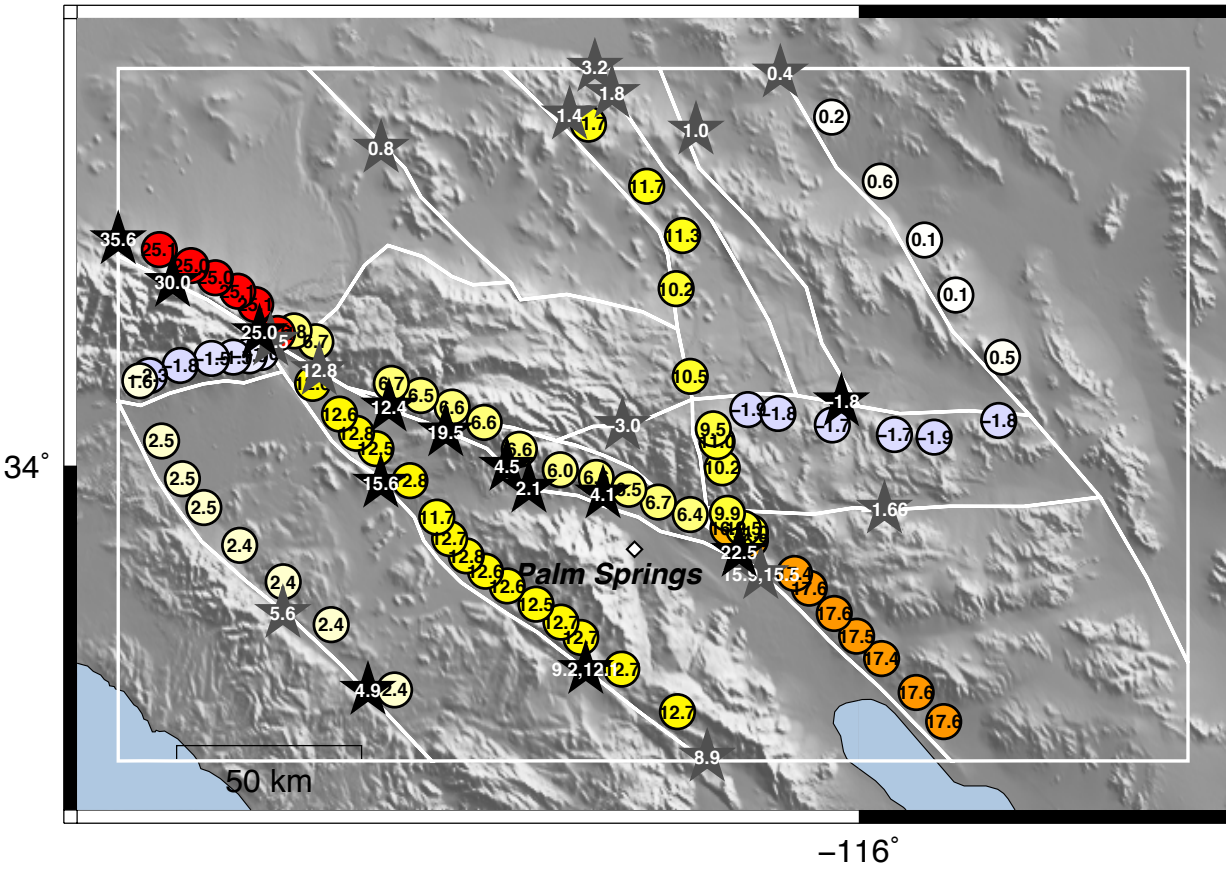

N. SGP14, Observed (unreduced) GPS field

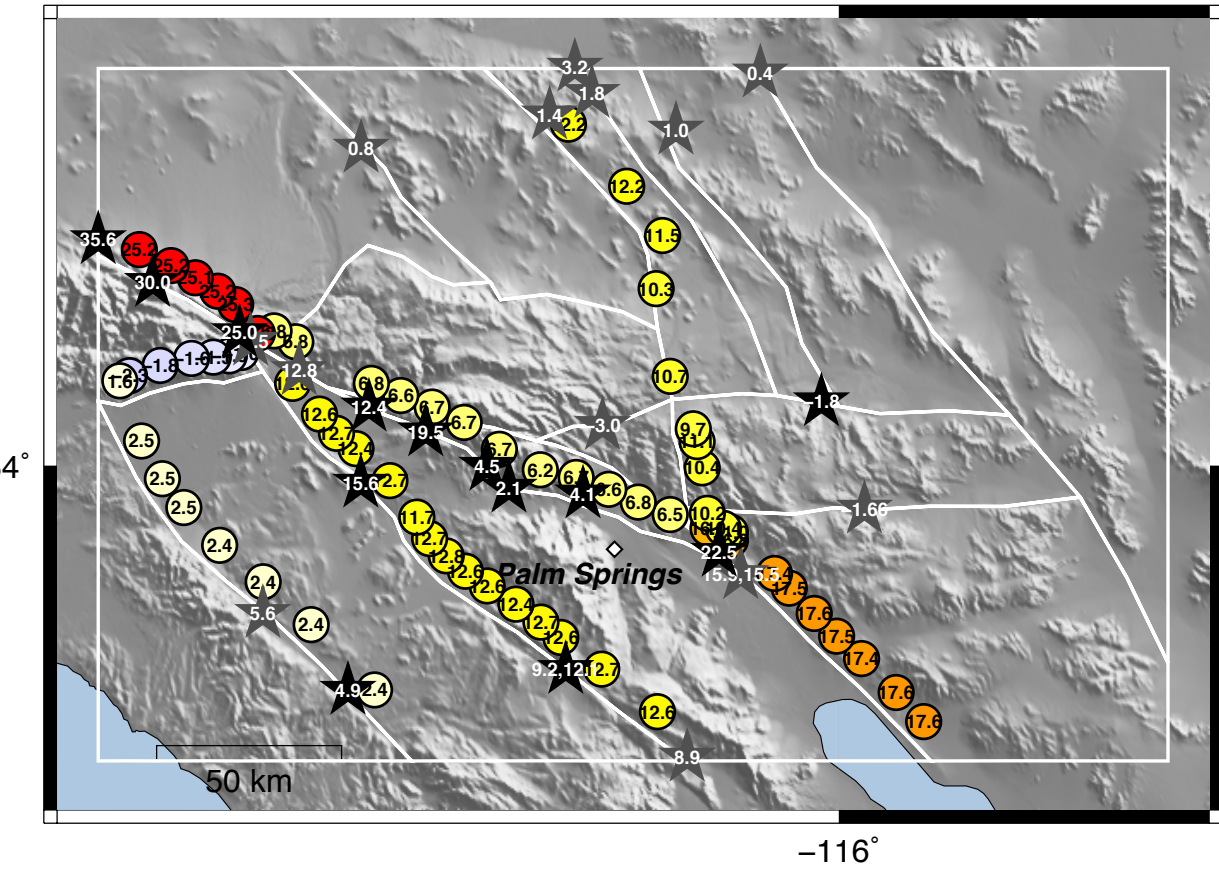

O. SGP15, Observed (unreduced) GPS field

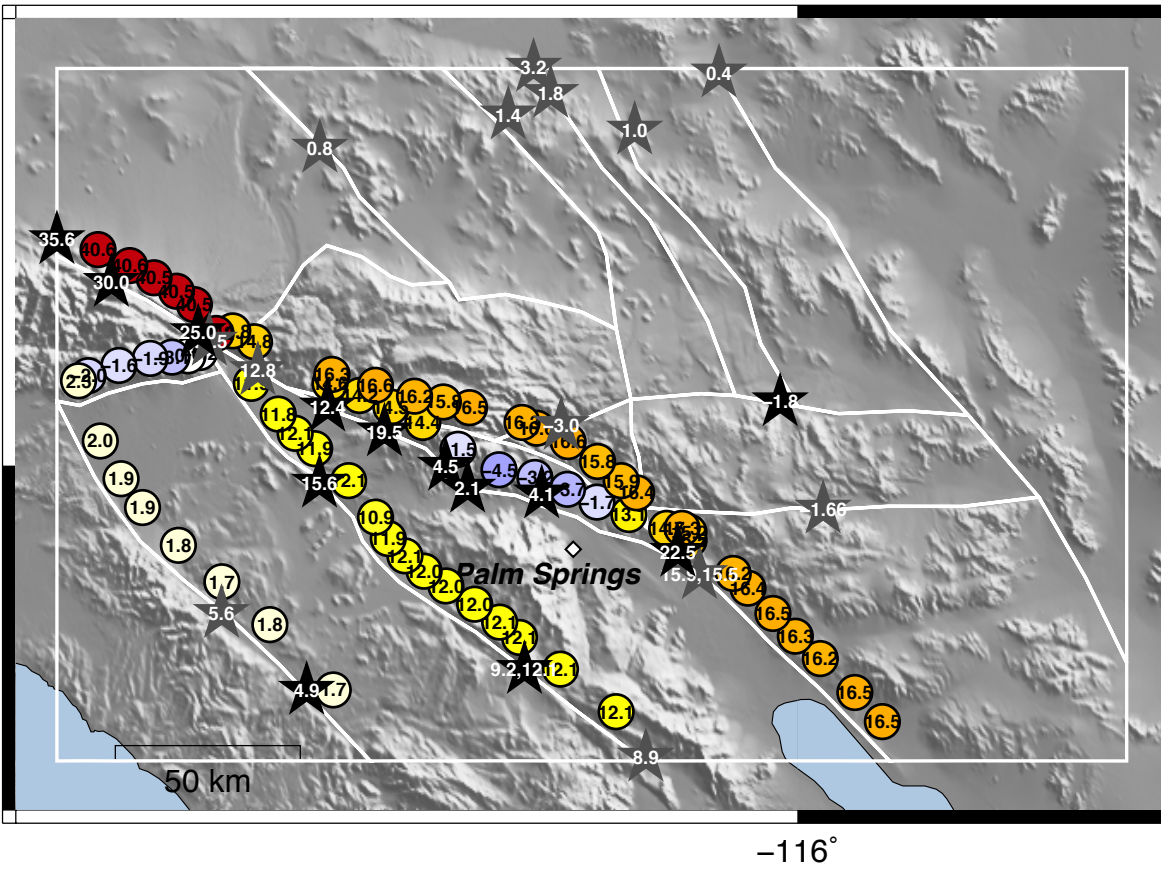

P. SGP16, Observed (unreduced) GPS field

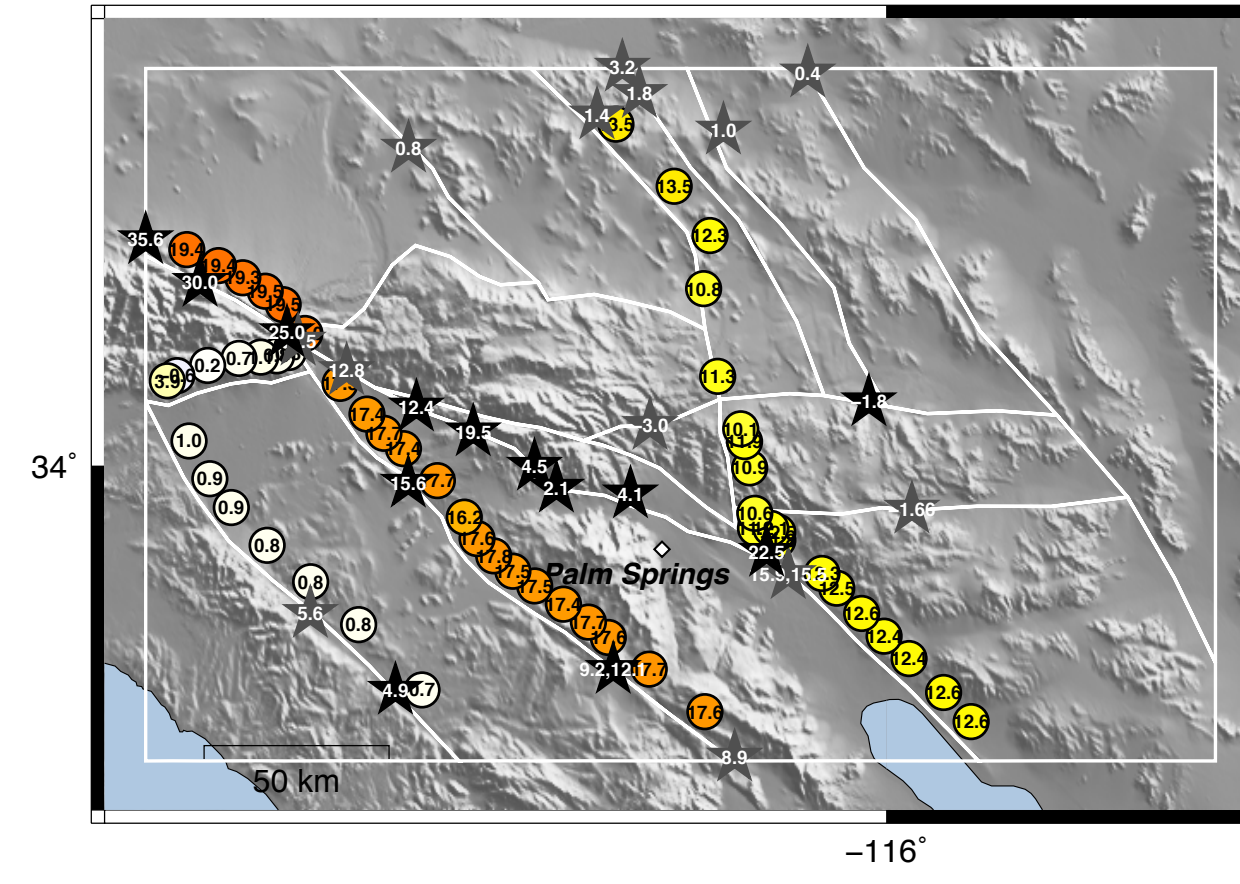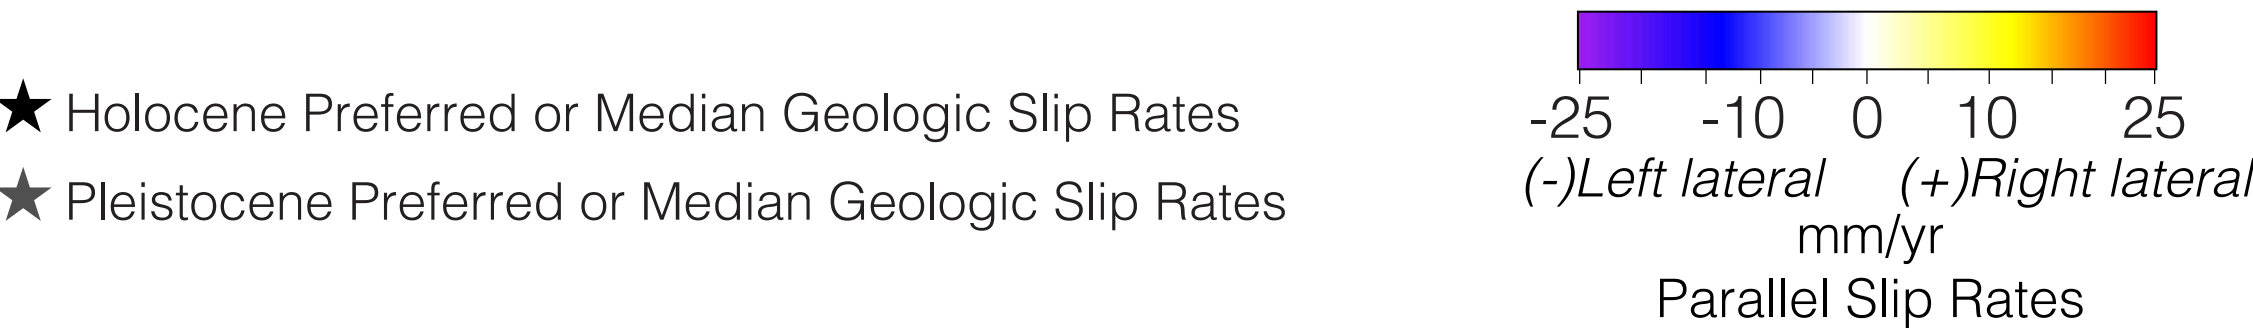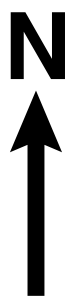

Supplement: Supplementary file 7 [file 2]
