# Supplementary material
Source: publisher figshare collection journal article supplement (https://gsapubs.figshare.com/articles/dataset/_/13123292)

A. SGP1, Partially reduced GPS field

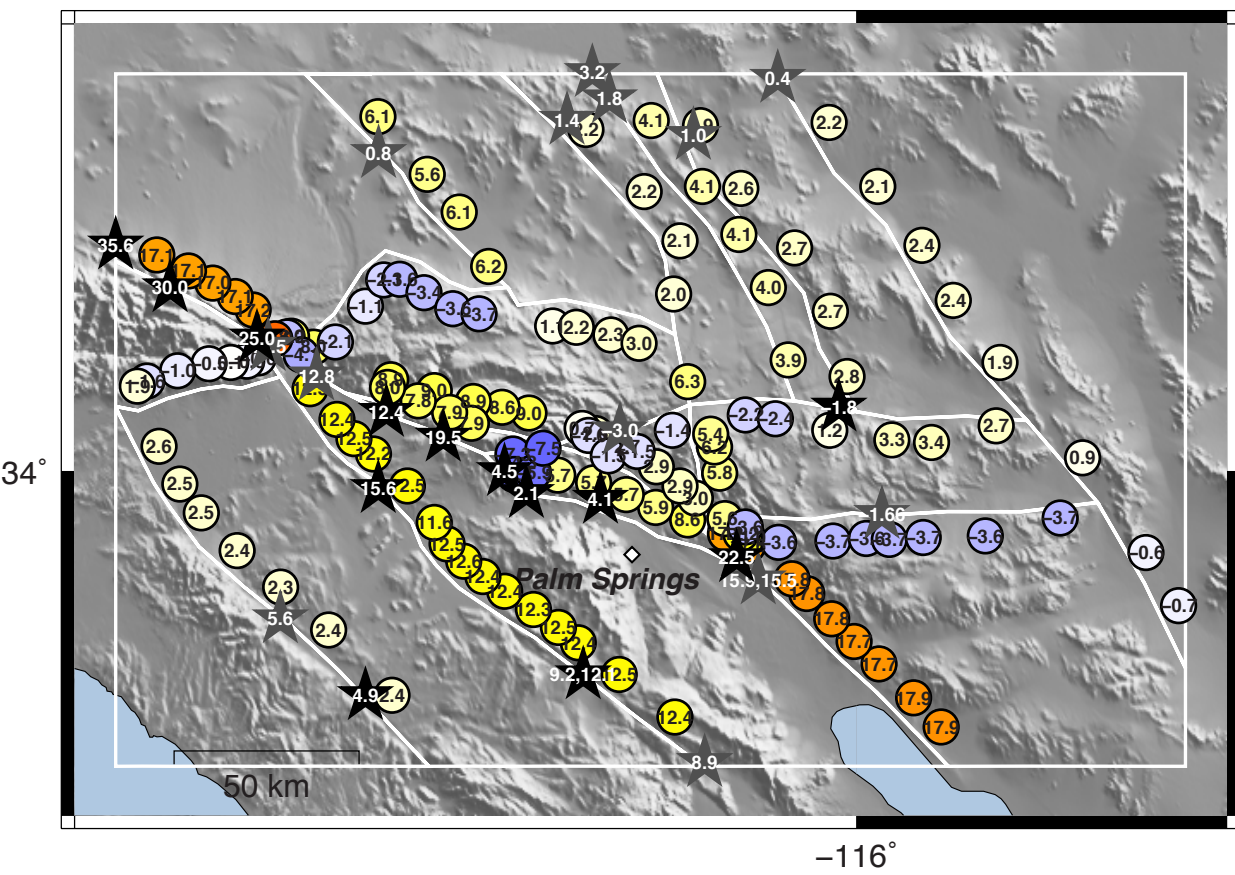

B. SGP2 Partially reduced GPS field

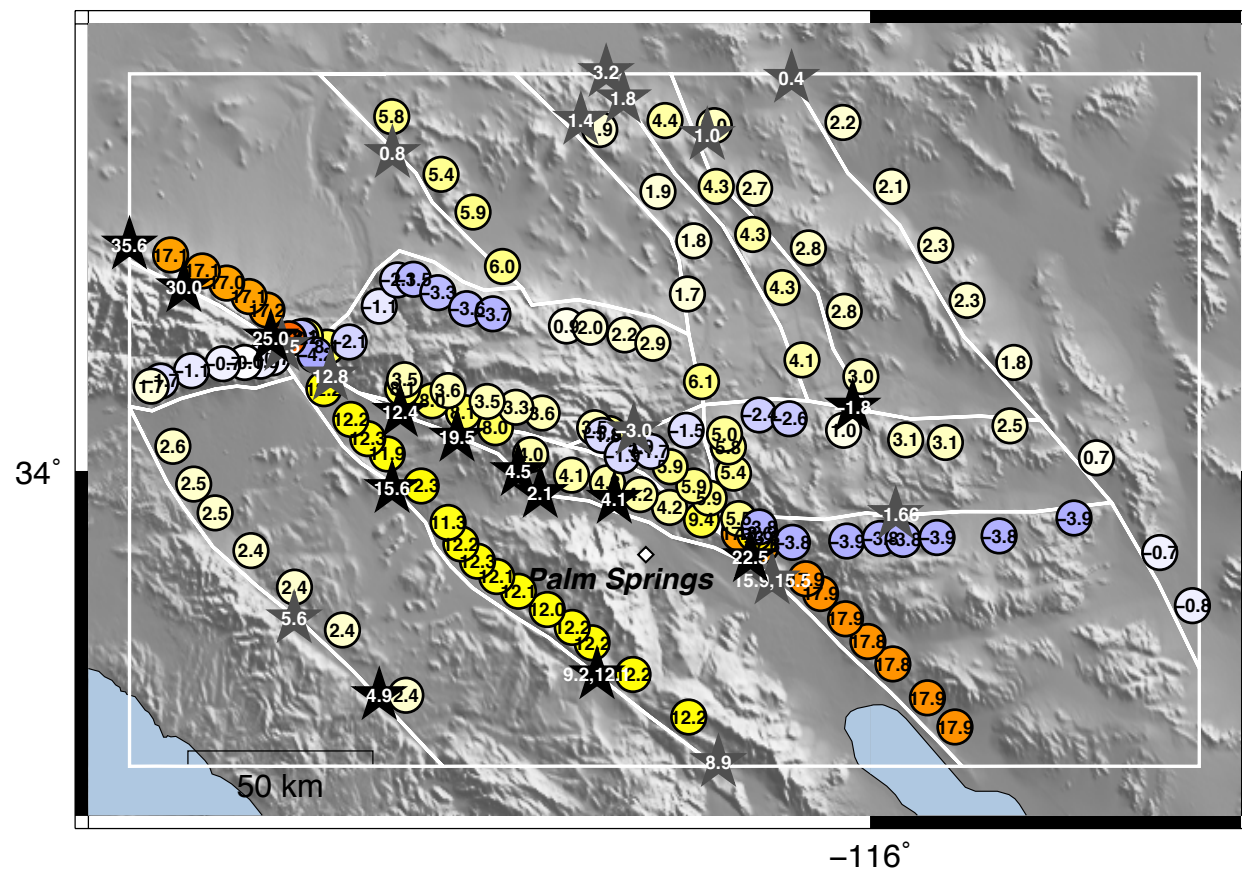

C. SGP3, Partially reduced GPS field

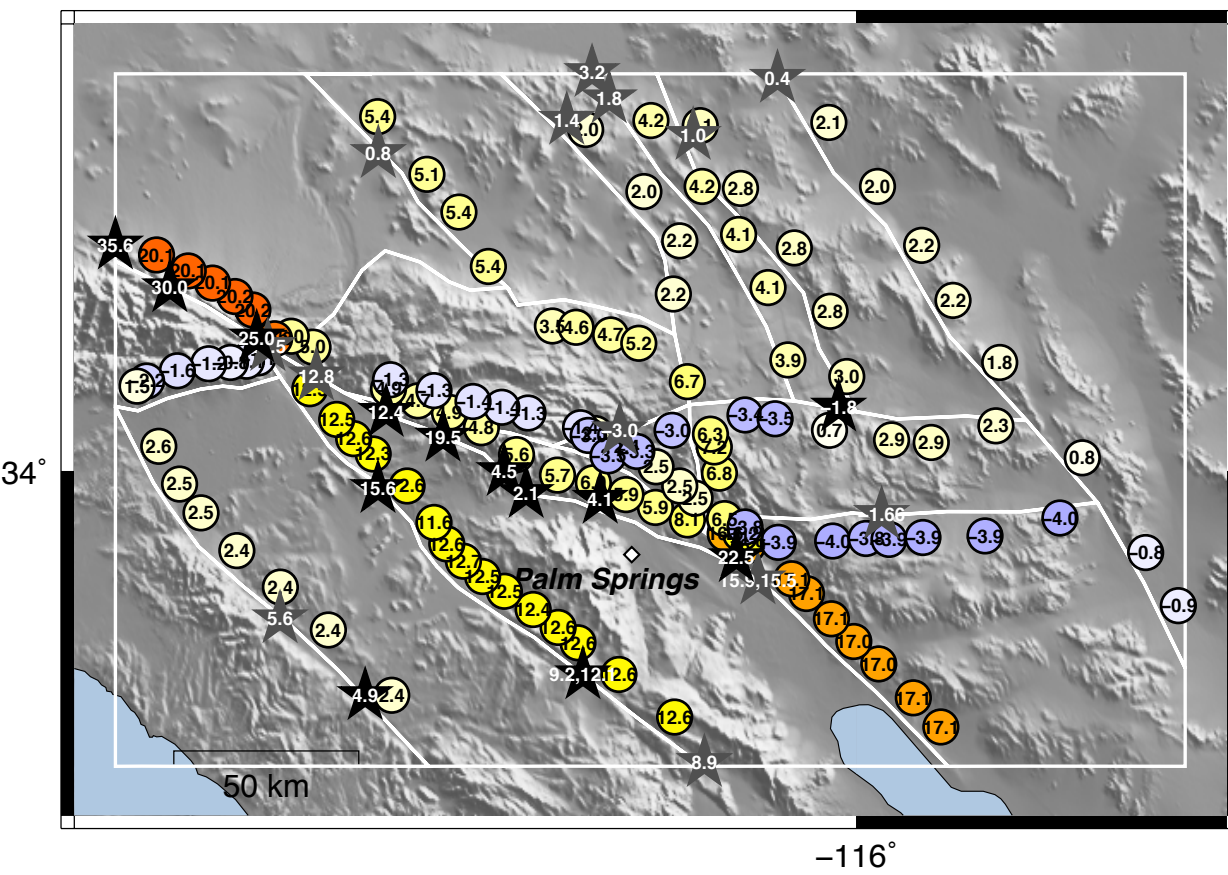

D. SGP4, Partially reduced GPS field

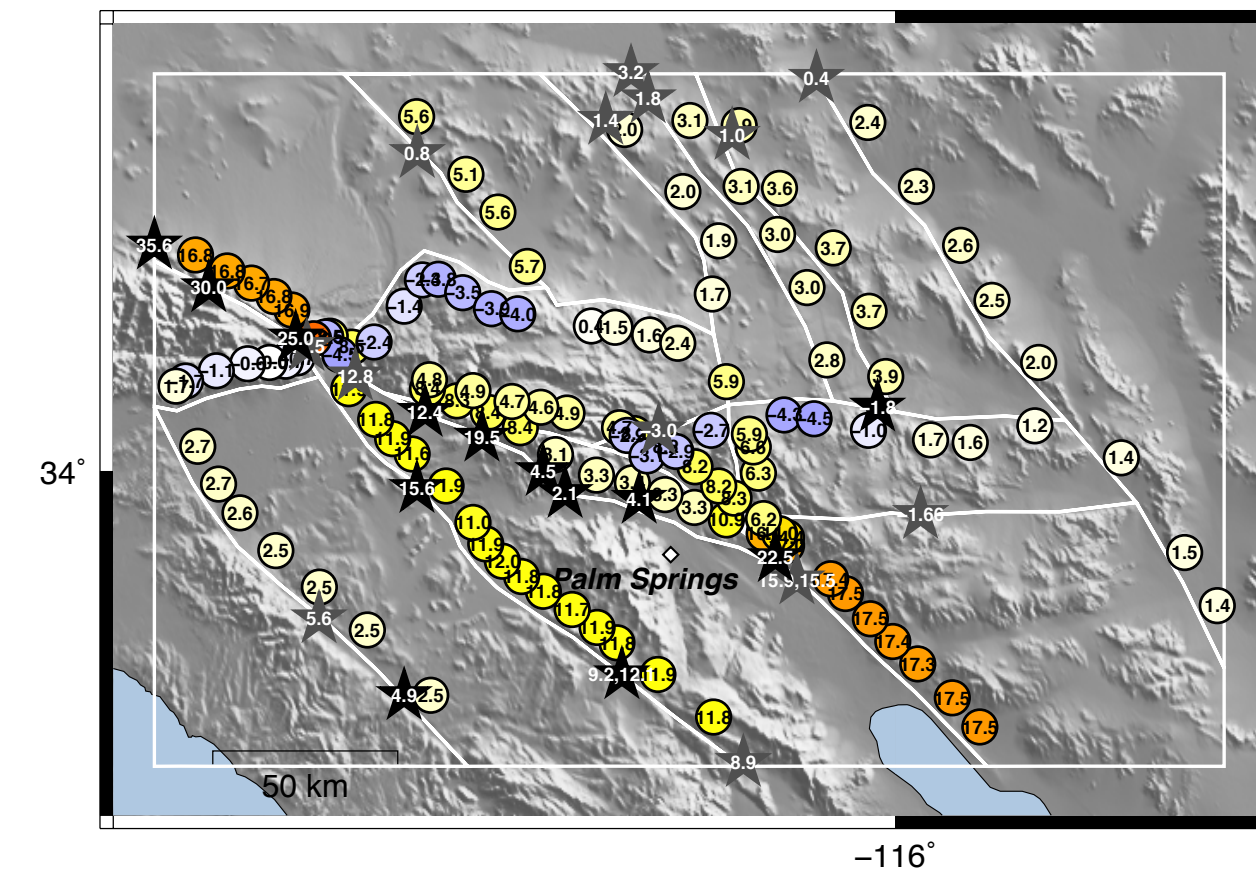

E. SGP5, Partially reduced GPS field

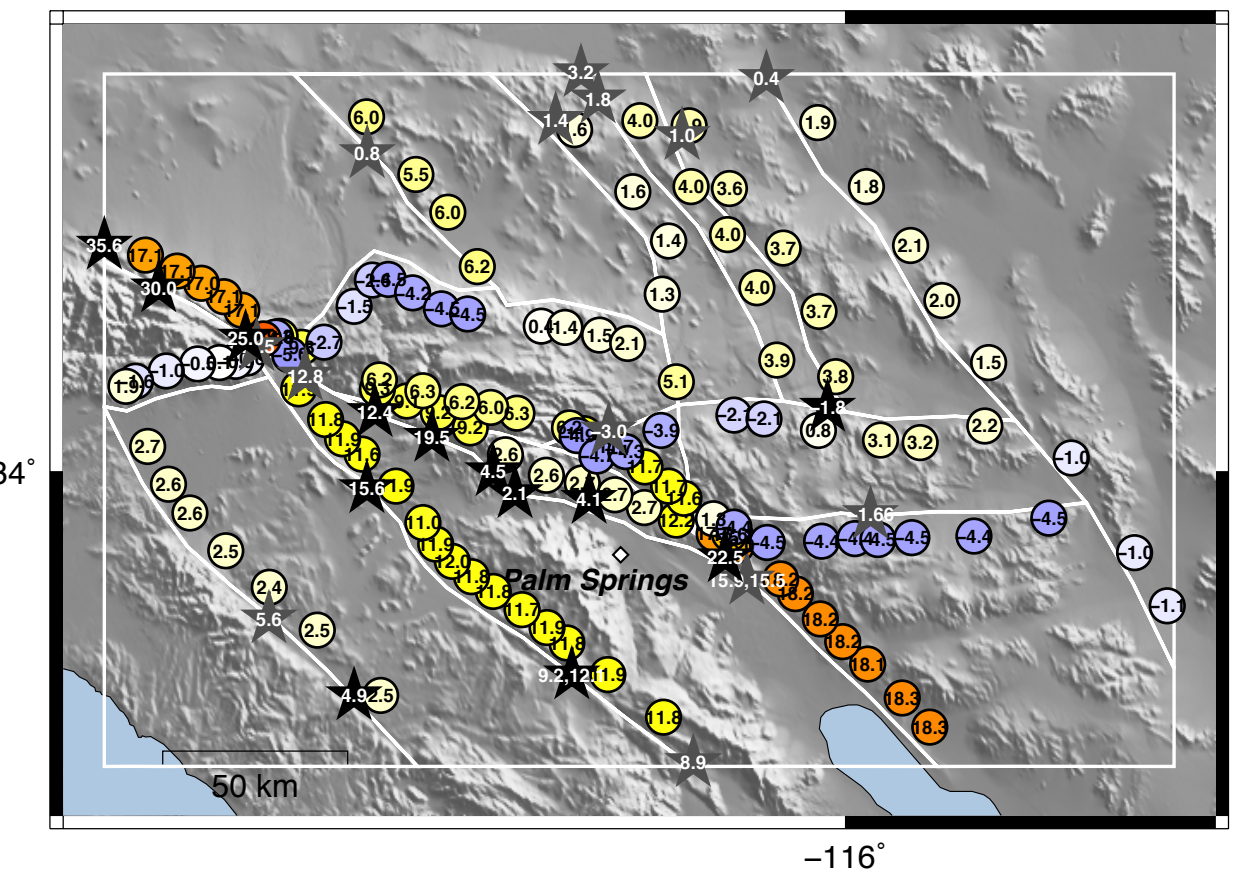

F. SGP6, Partially reduced GPS field

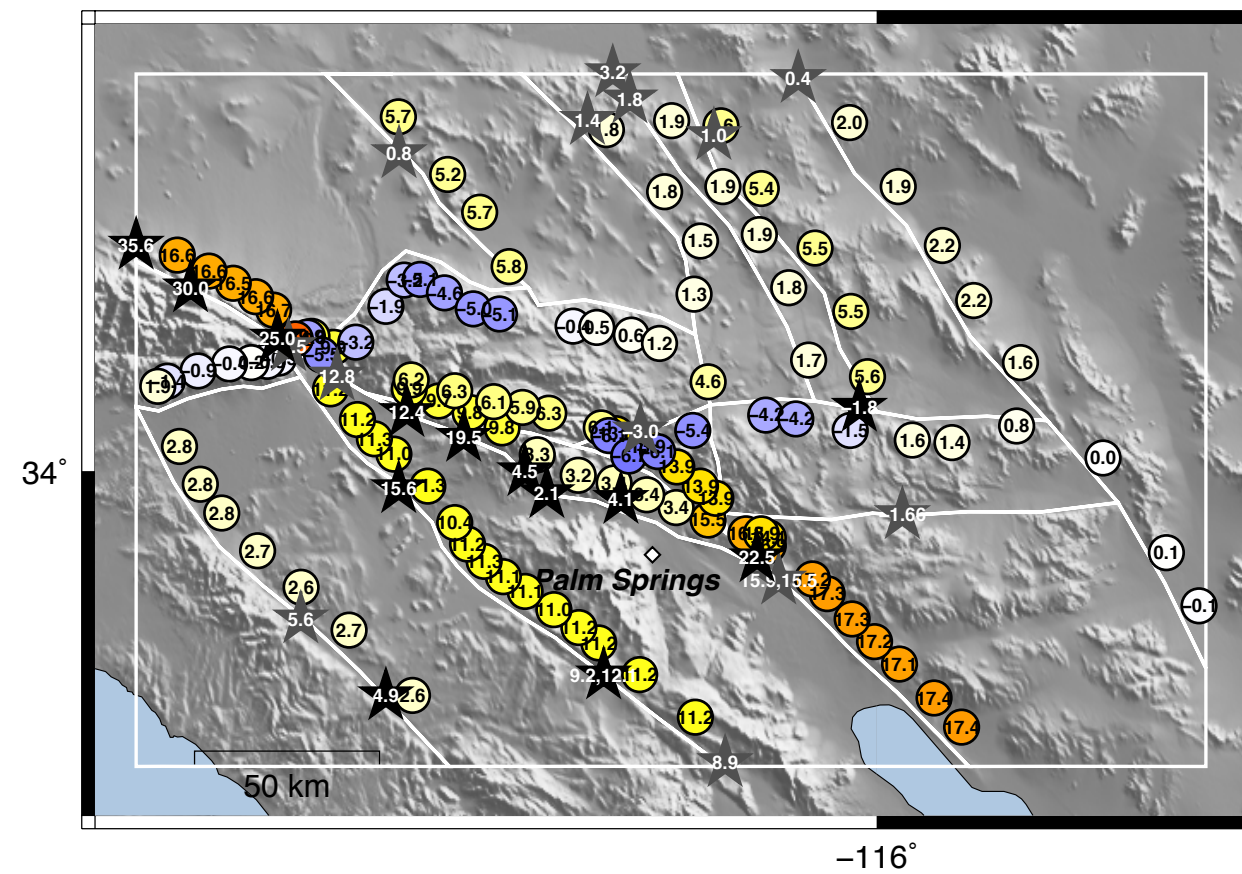

G. SGP7, Partially reduced GPS field

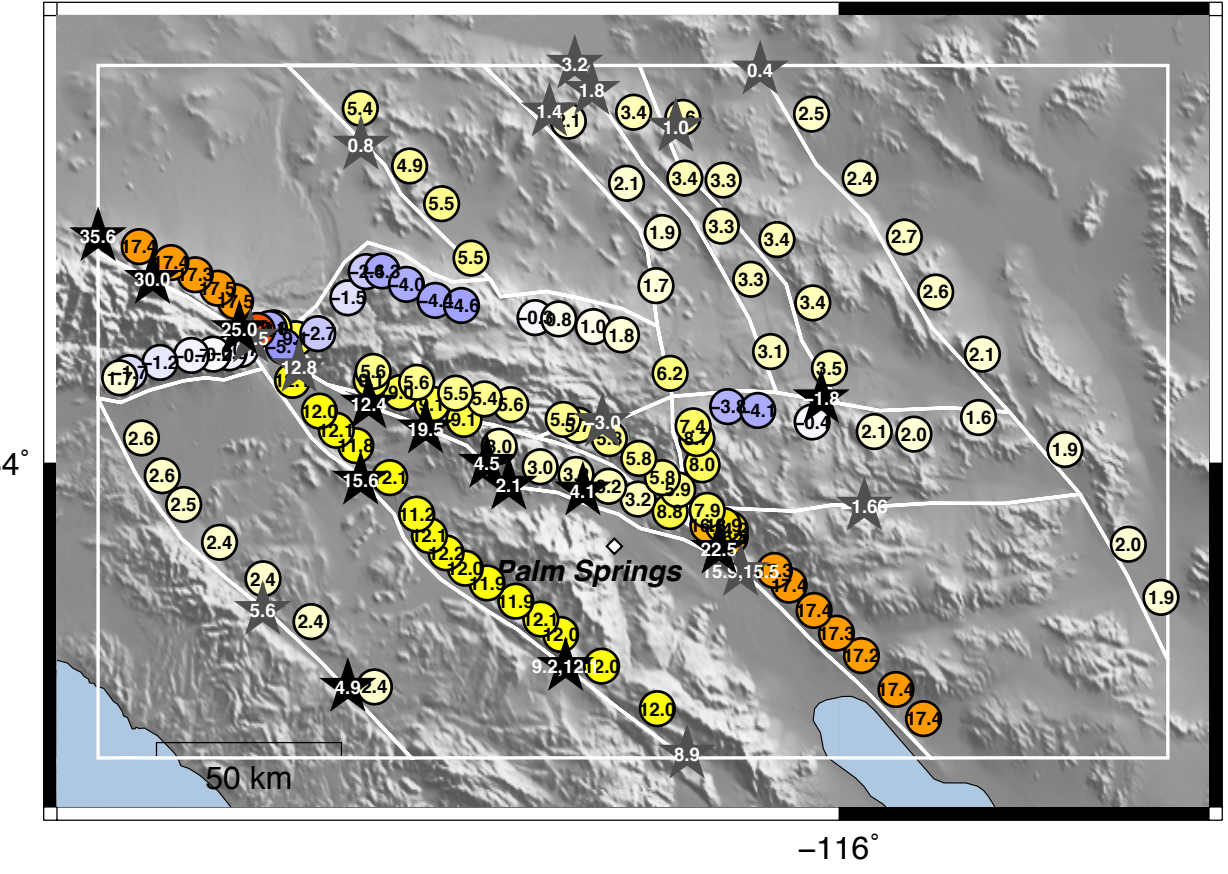

H. SGP8, Partially reduced GPS field

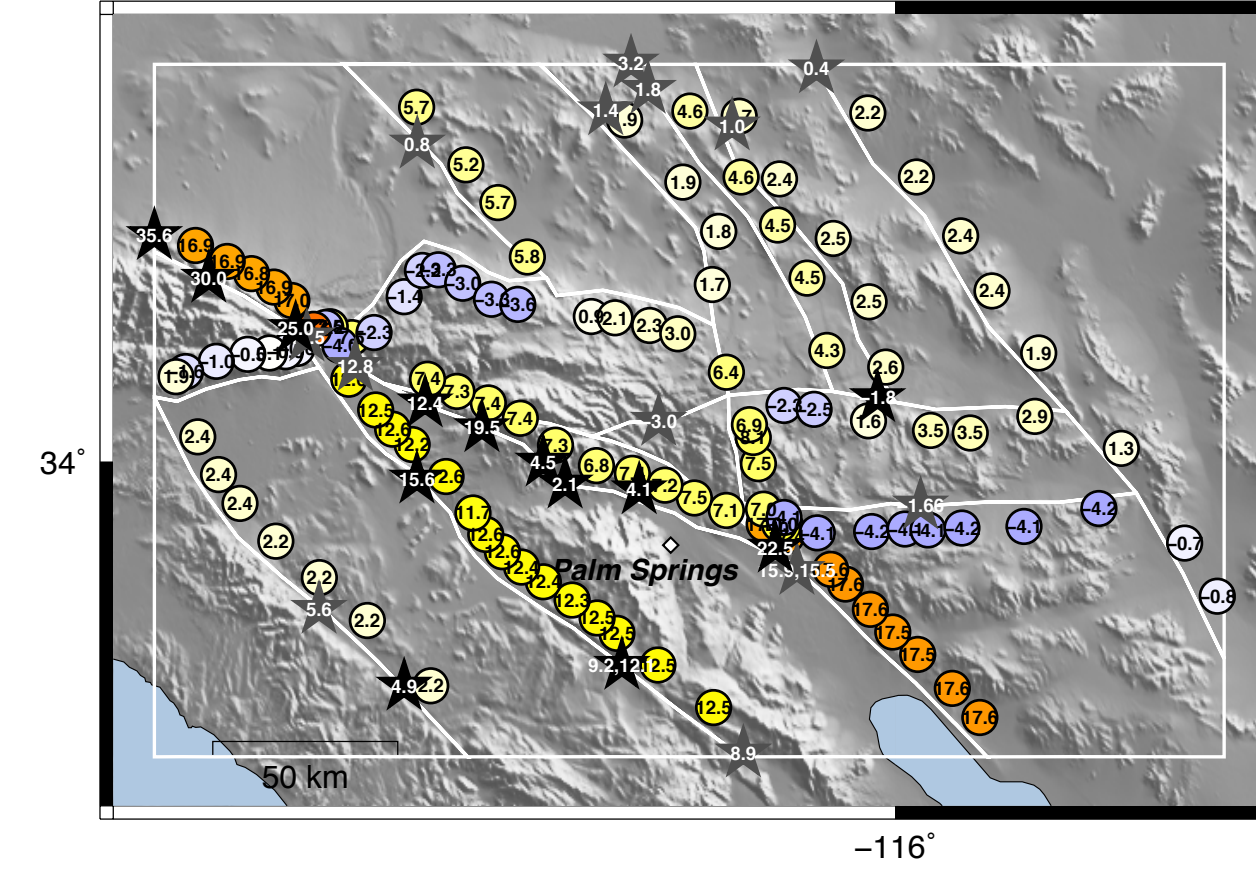

I. SGP9, Partially reduced GPS field

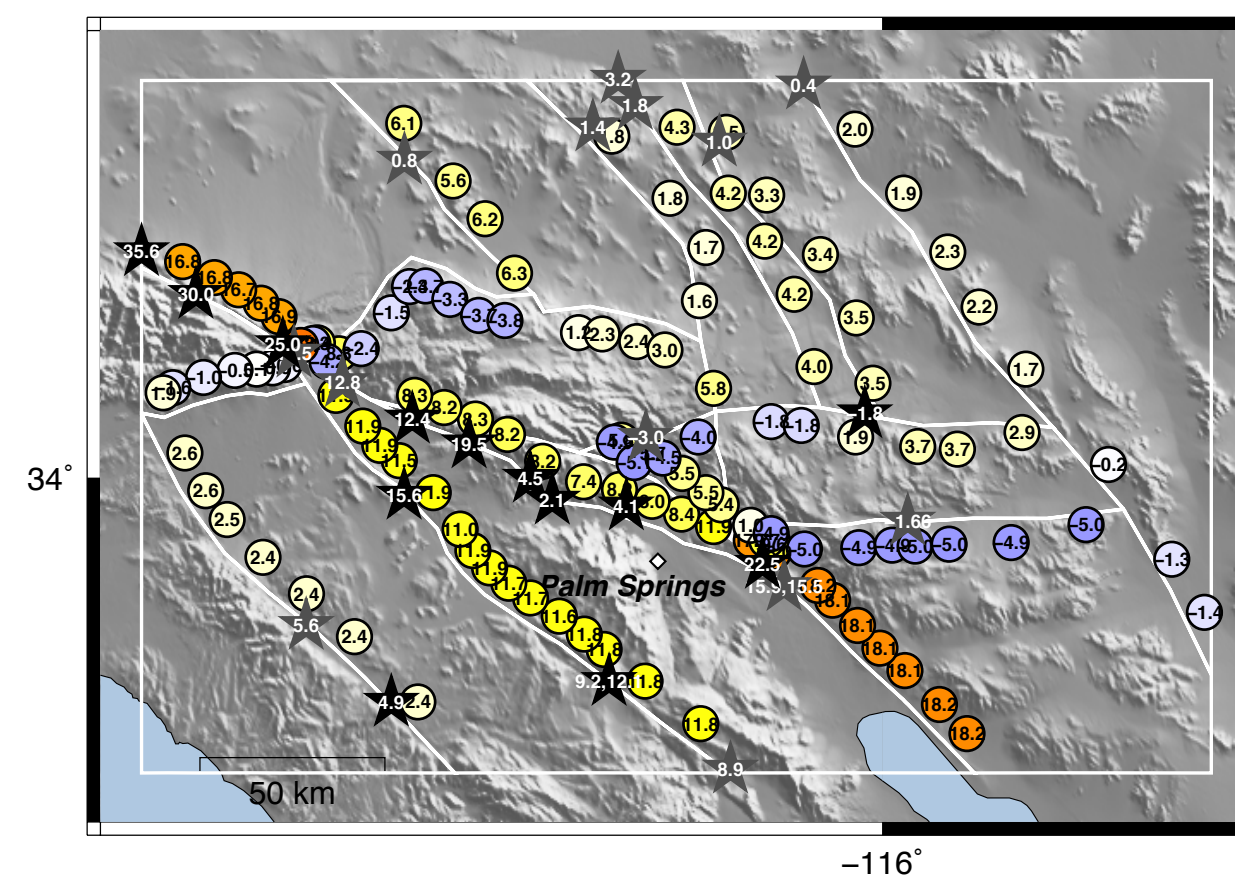

J. SGP10, Partially reduced GPS field

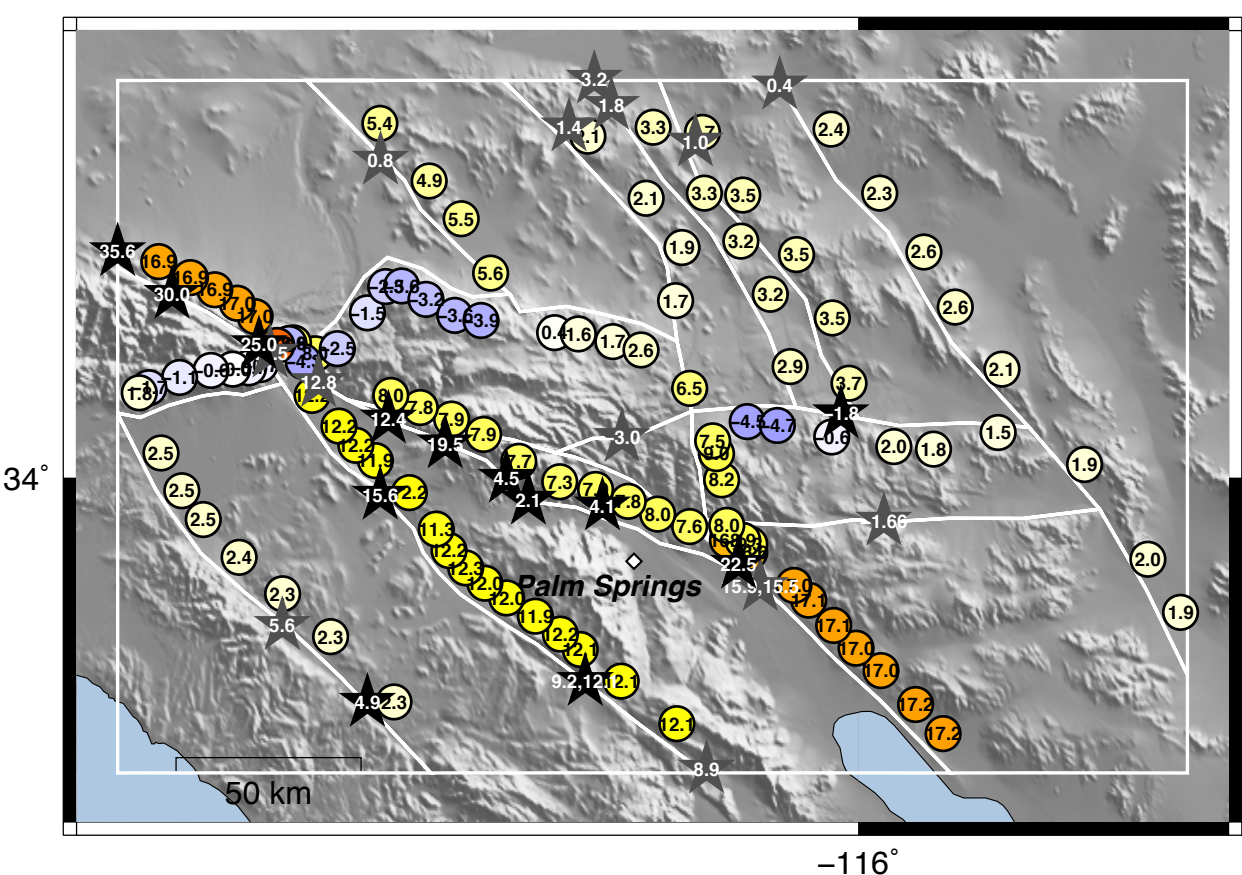

K. SGP11, Partially reduced GPS field

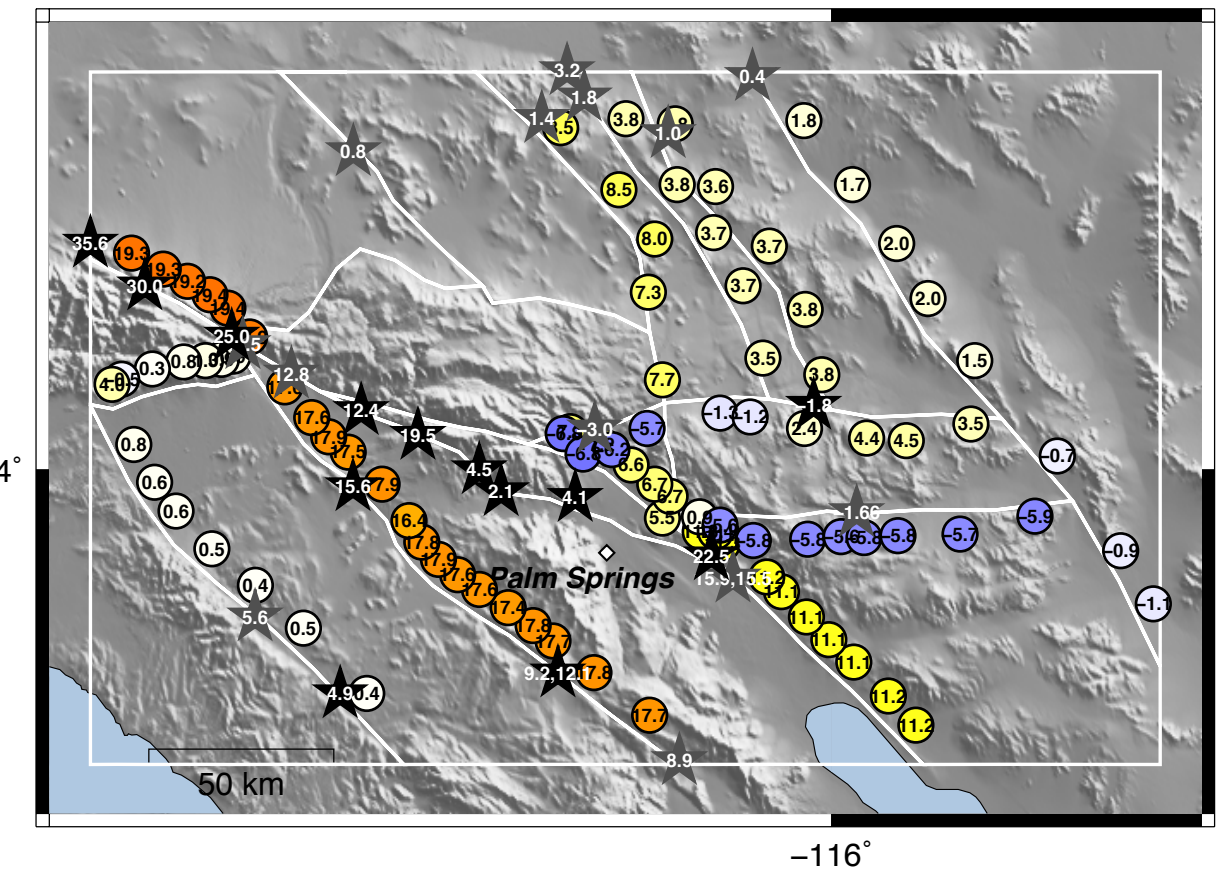

L. SGP12, Partially reduced GPS field

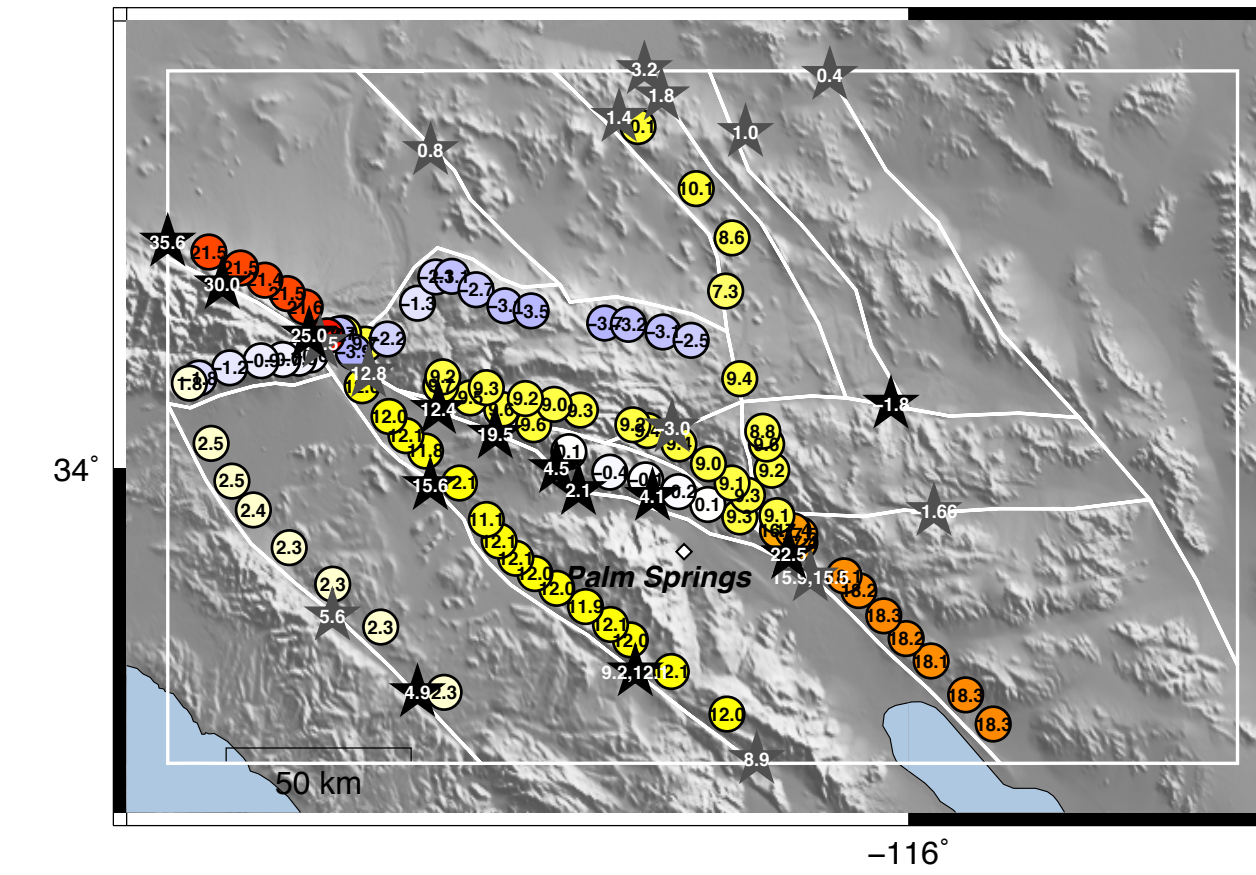

M. SGP13, Partially reduced GPS field

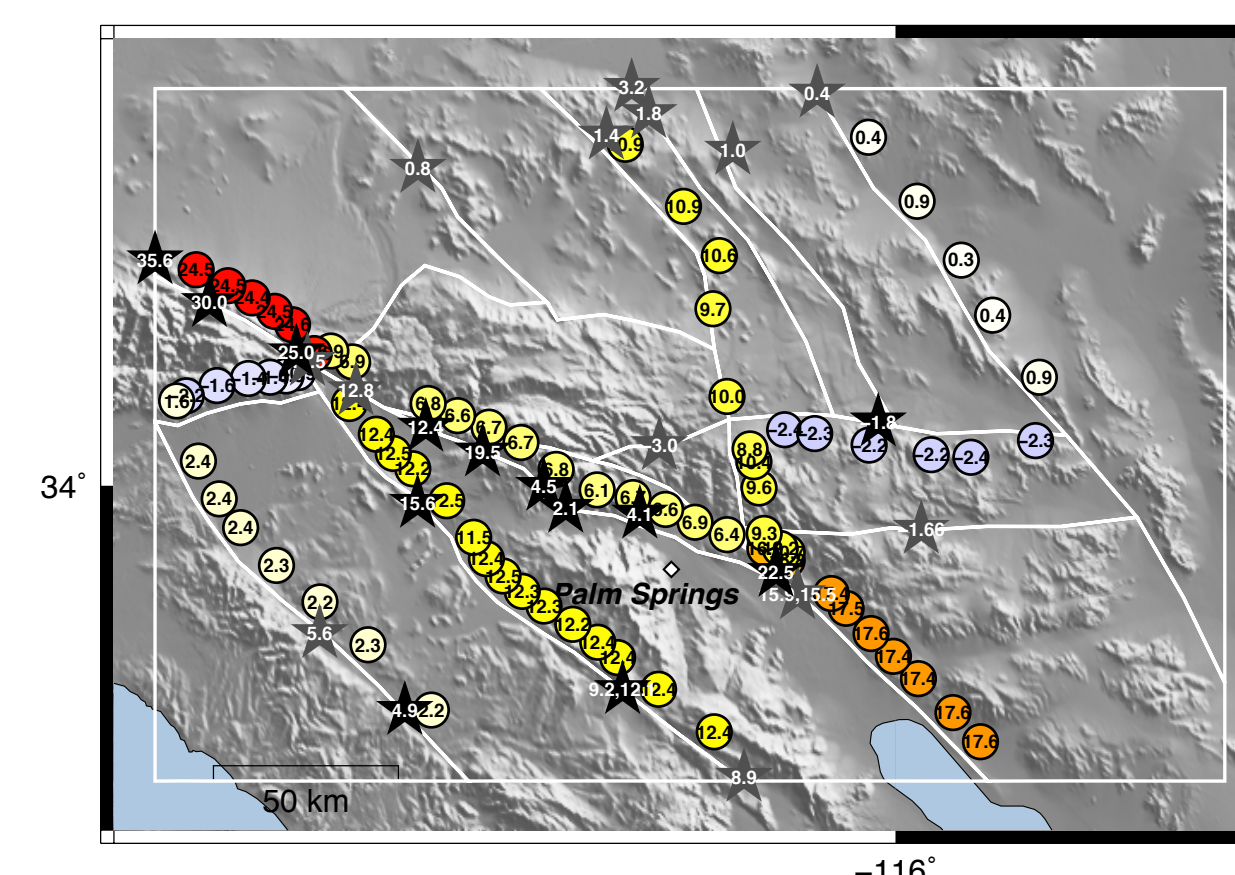

N. SGP14, Partially reduced GPS field

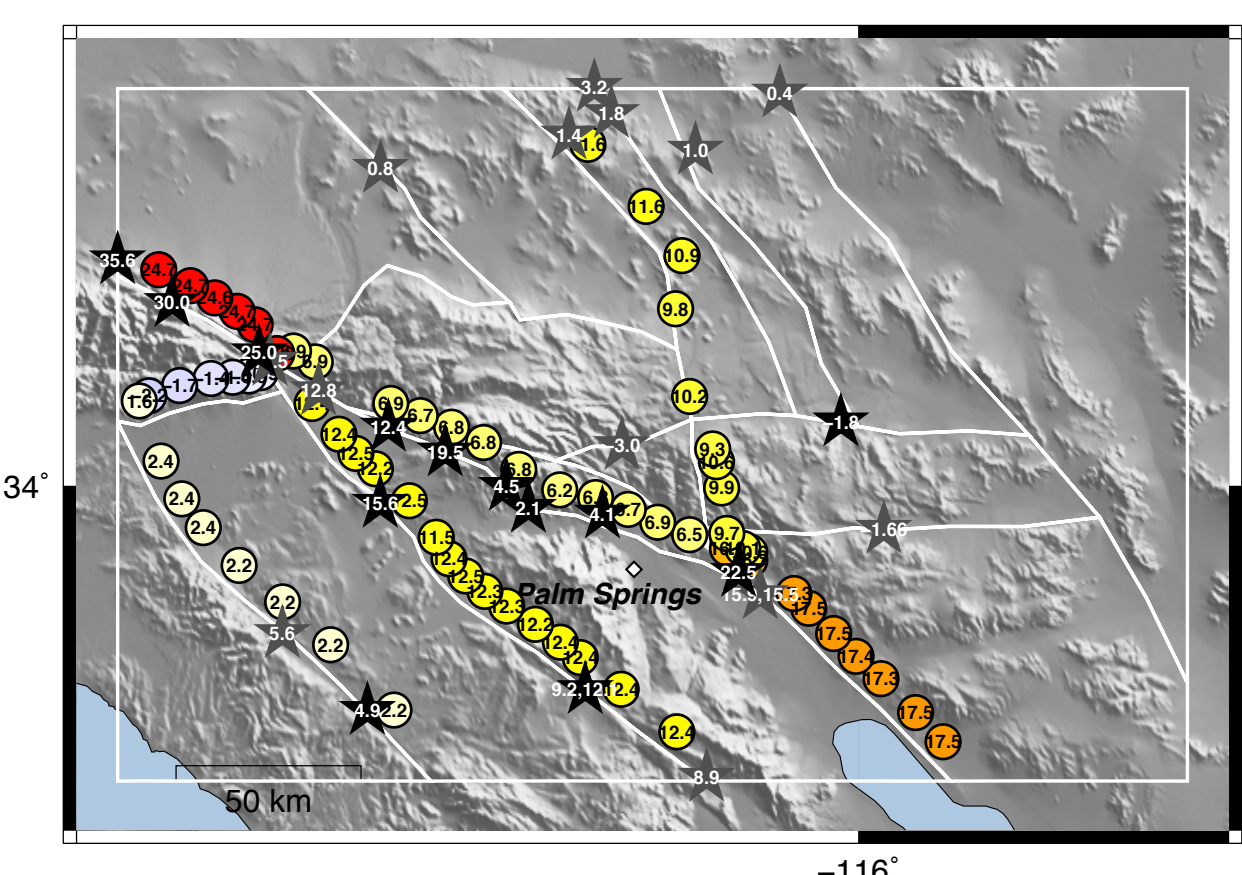

O. SGP15, Partially reduced GPS field

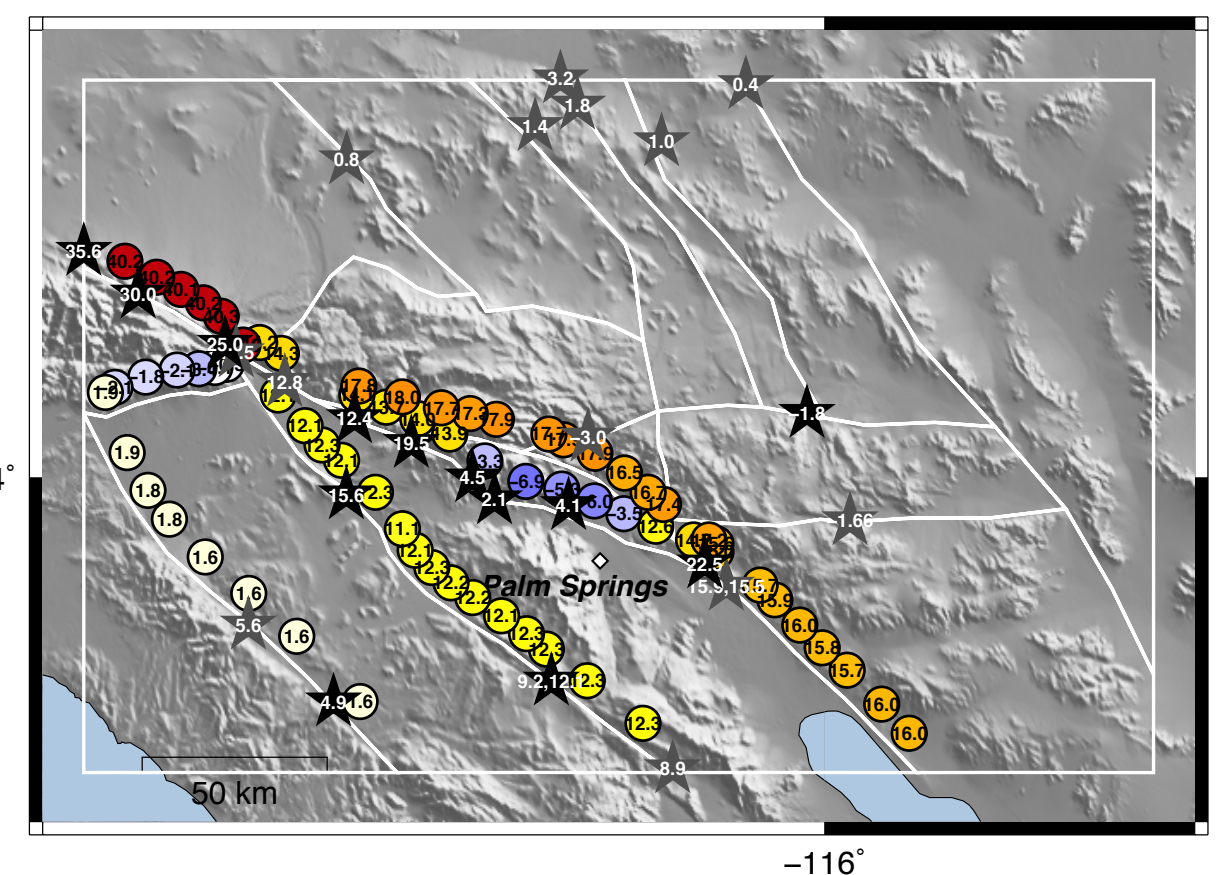

P. SGP16, Partially reduced GPS field

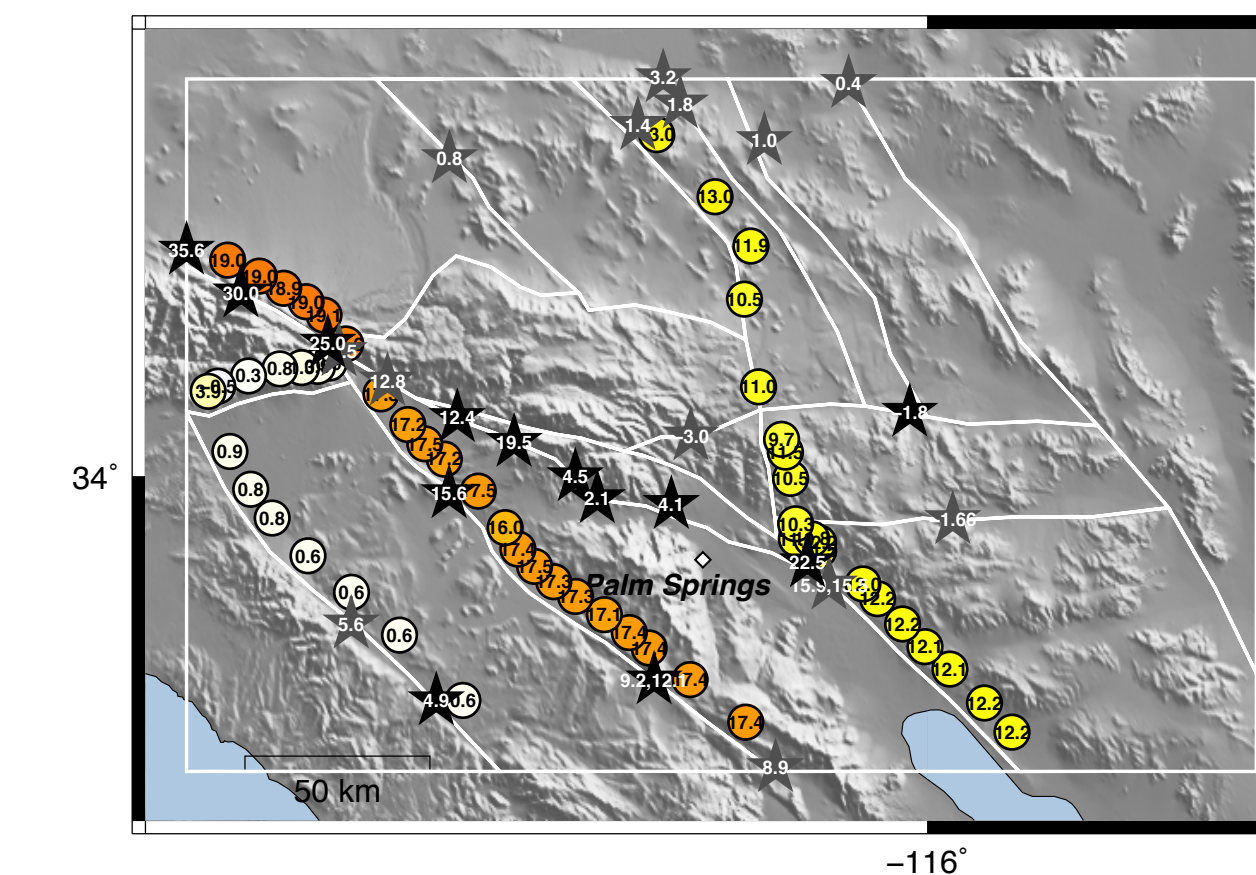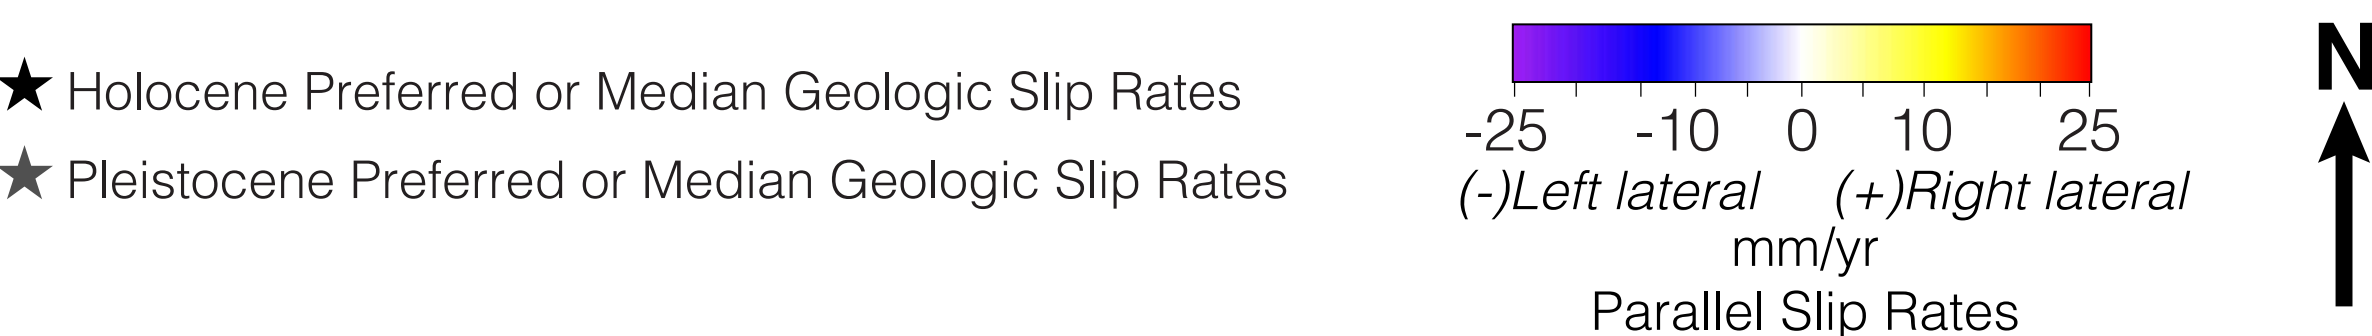

Supplement: Supplementary file 8 [file 2]
