# Supplementary material
Source: publisher figshare collection journal article supplement (https://gsapubs.figshare.com/articles/dataset/_/13123292)

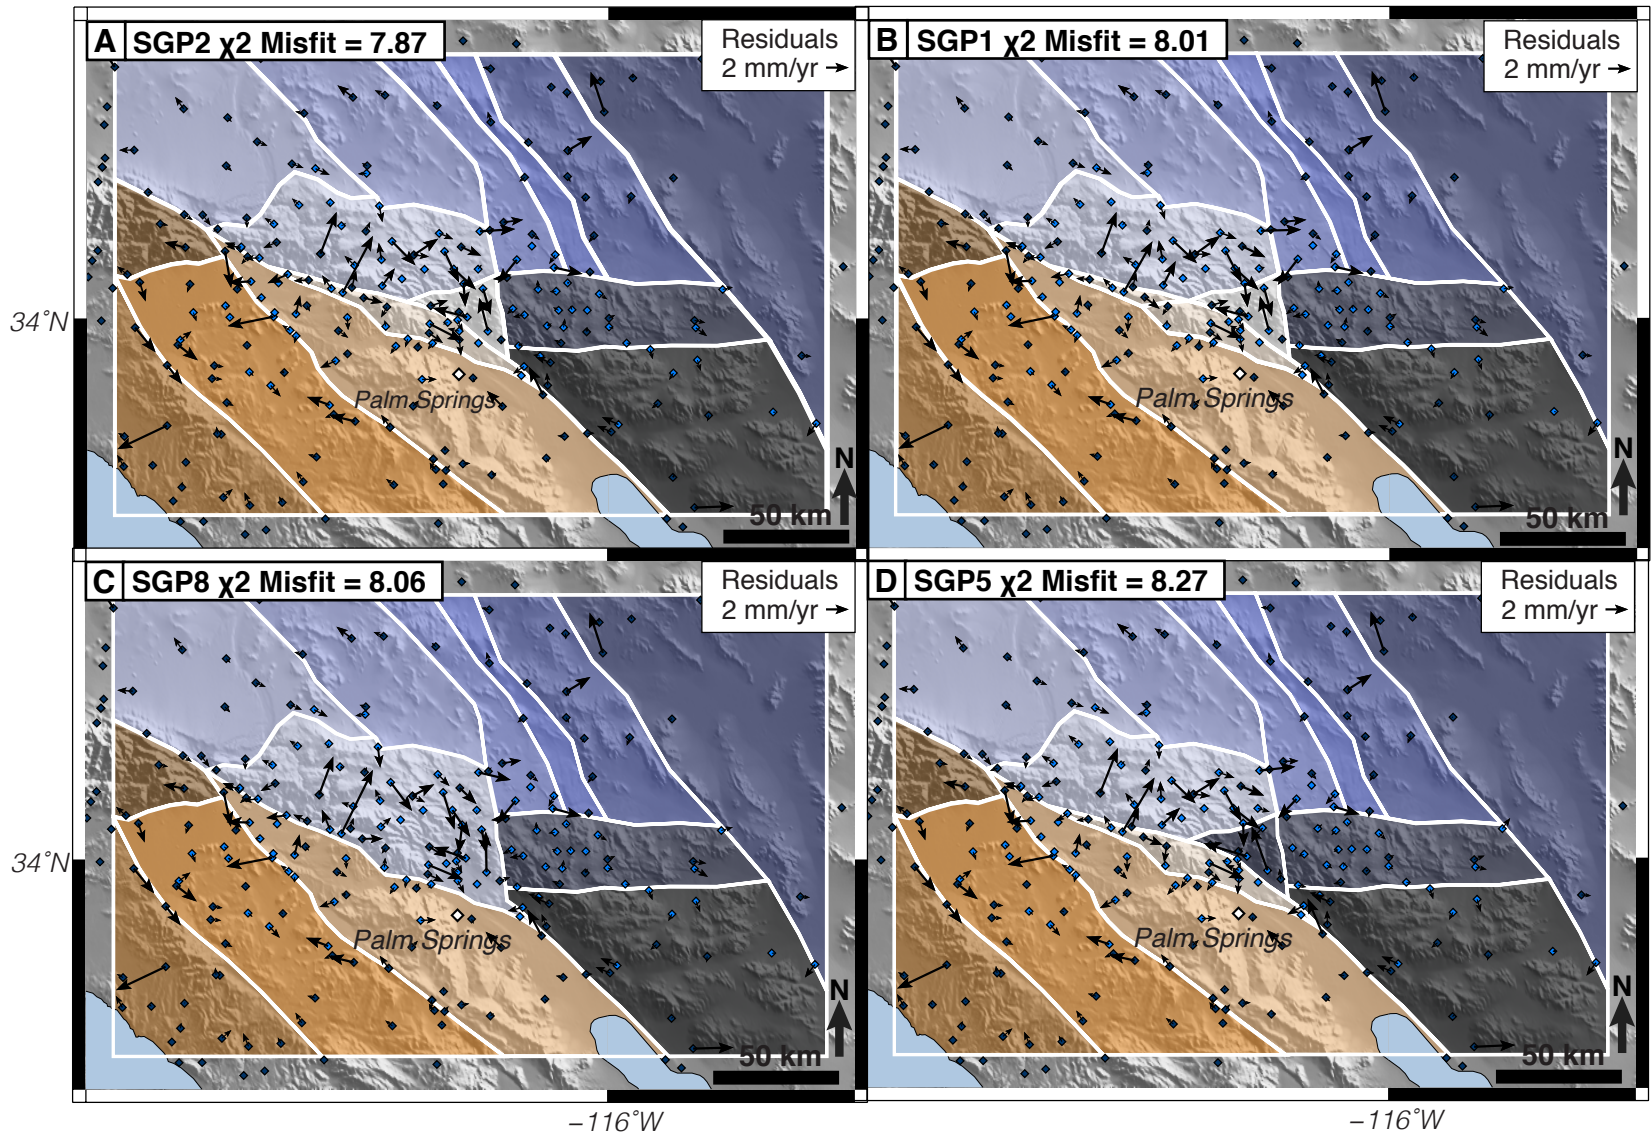

Supplement: Supplementary file 5 [file 2]

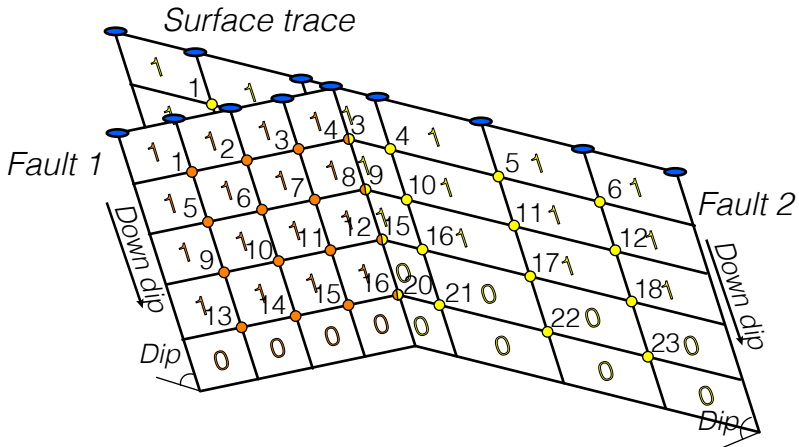

Supplement: Supplementary file 6 [file 2]

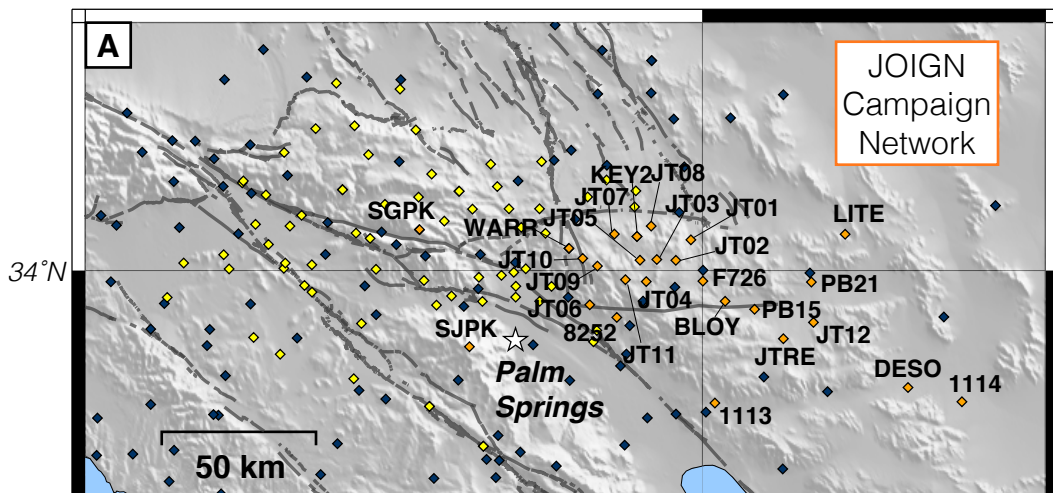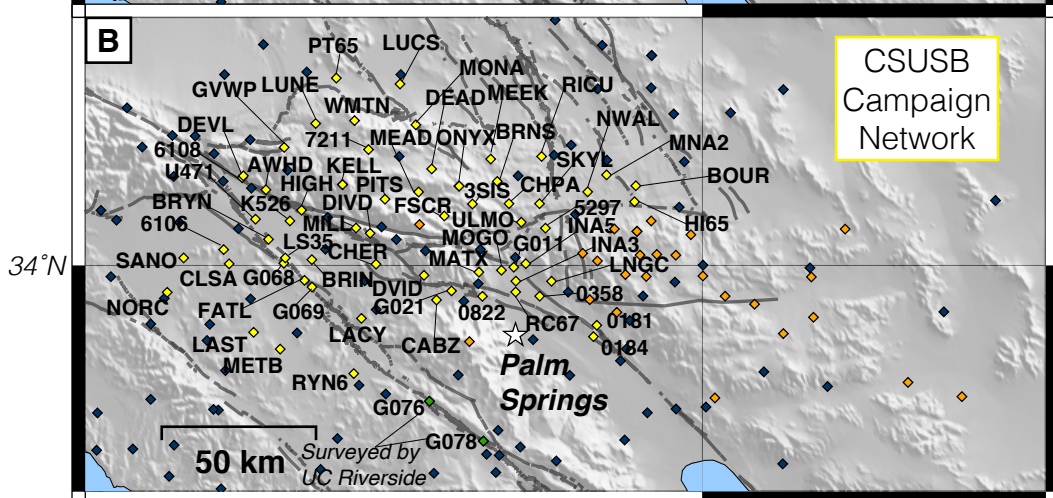

-116°W

Supplement: Supplementary file 9 [file 2]
